# Supplementary material for: Tick and Host Derived Compounds Detected in the Cement Complex Substance
Source: MDPI journal article supplement (doi:10.3390/biom10040555), 2020-04-05

#### **Data S5. Composition of chemical elements in *R. microplus* tick cement and salivary glands.**

The *R. microplus* tick cement and salivary gland samples were dehydrated in an incubator at 37 °C for 24 h in preparation for analysis with a scanning electron microscope (SEM). The samples were placed and mounted on standard aluminum SEM sample holders with conductive carbon adhesive tabs. The samples were observed and analyzed with a field emission scanning electron microscope (Zeiss GeminiSEM 500, Oberkochen, Germany) operating in high vacuum mode at an acceleration voltage of 15 kV and without metal coating. Three area scans per sample were used using an 80 mm<sup>2</sup> dispersive energy spectroscopy (EDS) detector (Oxford Instruments, Abingdon, United Kingdom).

29/11/2019 09:57:44

Project 1

Cemento Mexico T1

CM1 15 Kv

Electron Image 28

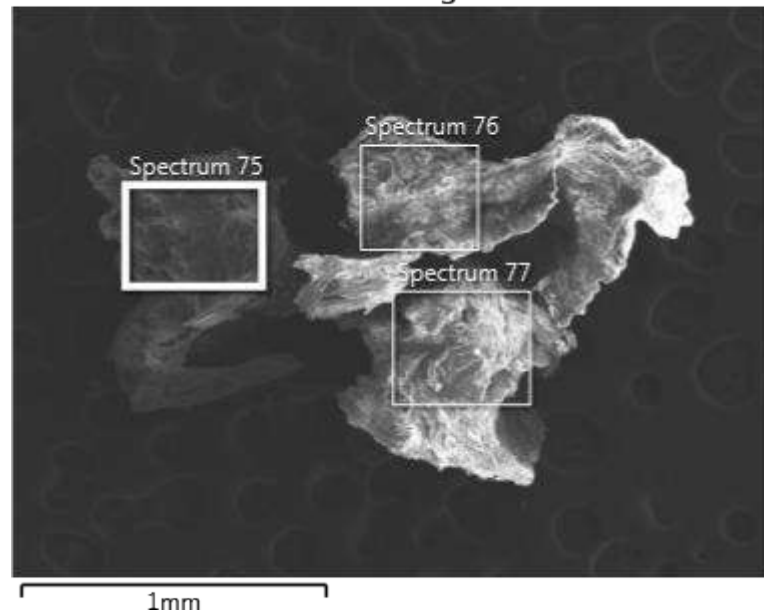

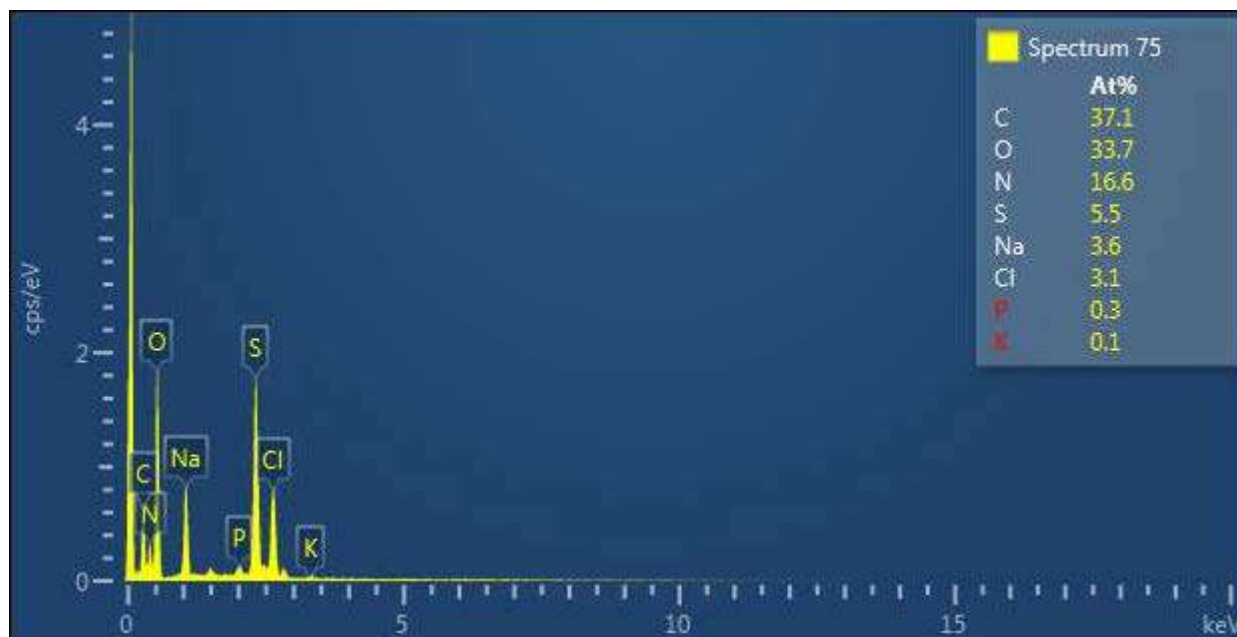

|                                 |                     |
|---------------------------------|---------------------|
| Label:                          | Spectrum 75         |
| Source:                         | Acquired            |
| Created:                        | 29/11/2019 09:57:44 |
| Livetime:                       | 60.4s               |
| Process Time:                   | 4                   |
| Accelerating Voltage:           | 15.00kV             |
| Magnification:                  | 45 x                |
| Working Distance:               | 9.9mm               |
| Specimen Tilt (degrees):        | 0.0                 |
| Elevation (degrees):            | 35.0                |
| Azimuth (degrees):              | 0.0                 |
| Number Of Channels:             | 2048                |
| Energy Range (keV):             | 20 keV              |
| Energy per Channel (eV):        | 10.0eV              |
| Detector Type Id:               | 29                  |
| Detector Type:                  | X-Max               |
| Window Type:                    | SATW                |
| Pulse Pile Up Correction:       | Succeeded           |
| Primary Detector:               | 2617                |
| Primary Detector Serial Number: | 77871-X080          |

| Element | Line Type | Apparent Concentration | k Ratio | Wt%   | Wt% Sigma | Standard Label | Factory Standard | Standard Calibration Date |
|---------|-----------|------------------------|---------|-------|-----------|----------------|------------------|---------------------------|
| C       | K series  | 1.15                   | 0.01148 | 27.82 | 1.31      | C Vit          | Yes              |                           |
| N       | K series  | 3.09                   | 0.00549 | 14.55 | 1.05      | BN             | Yes              |                           |
| O       | K series  | 5.33                   | 0.01794 | 33.70 | 0.84      | SiO2           | Yes              |                           |
| Na      | K         | 1.43                   | 0.00602 | 5.24  | 0.18      | Albite         | Yes              |                           |

|        |          |      |         |        |      |      |     |  |
|--------|----------|------|---------|--------|------|------|-----|--|
|        | series   |      |         |        |      |      |     |  |
| P      | K series | 0.17 | 0.00094 | 0.49   | 0.07 | GaP  | Yes |  |
| S      | K series | 2.62 | 0.02255 | 11.10  | 0.30 | FeS2 | Yes |  |
| Cl     | K series | 1.46 | 0.01276 | 6.88   | 0.22 | NaCl | Yes |  |
| K      | K series | 0.05 | 0.00040 | 0.21   | 0.07 | KBr  | Yes |  |
| Total: |          |      |         | 100.00 |      |      |     |  |

Electron Image 28

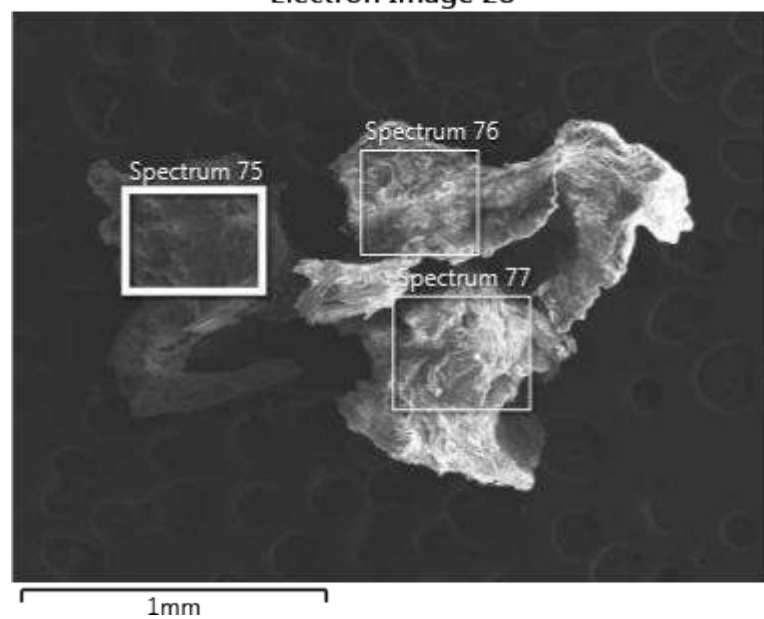



29/11/2019 09:58:53

Project 1

Cemento Mexico T1

CM1 15 Kv

Electron Image 28

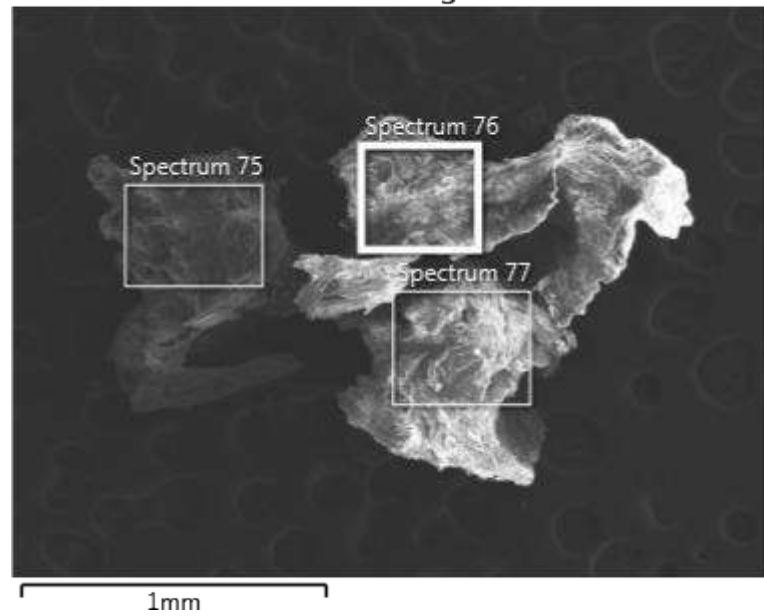

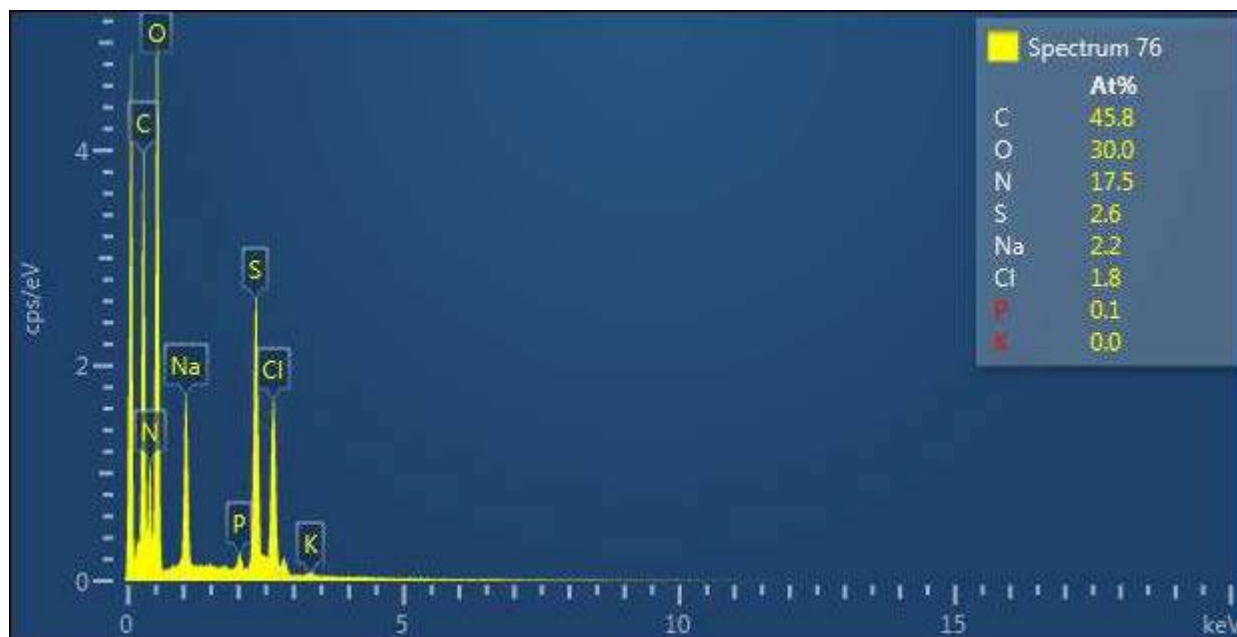

|                                 |                     |
|---------------------------------|---------------------|
| Label:                          | Spectrum 76         |
| Source:                         | Acquired            |
| Created:                        | 29/11/2019 09:58:53 |
| Livetime:                       | 60.5s               |
| Process Time:                   | 4                   |
| Accelerating Voltage:           | 15.00kV             |
| Magnification:                  | 45 x                |
| Working Distance:               | 9.9mm               |
| Specimen Tilt (degrees):        | 0.0                 |
| Elevation (degrees):            | 35.0                |
| Azimuth (degrees):              | 0.0                 |
| Number Of Channels:             | 2048                |
| Energy Range (keV):             | 20 keV              |
| Energy per Channel (eV):        | 10.0eV              |
| Detector Type Id:               | 29                  |
| Detector Type:                  | X-Max               |
| Window Type:                    | SATW                |
| Pulse Pile Up Correction:       | Succeeded           |
| Primary Detector:               | 2617                |
| Primary Detector Serial Number: | 77871-X080          |

| Element | Line Type | Apparent Concentration | k Ratio | Wt%   | Wt% Sigma | Standard Label | Factory Standard | Standard Calibration Date |
|---------|-----------|------------------------|---------|-------|-----------|----------------|------------------|---------------------------|
| C       | K series  | 7.45                   | 0.07455 | 37.22 | 0.61      | C Vit          | Yes              |                           |
| N       | K series  | 10.58                  | 0.01884 | 16.59 | 0.63      | BN             | Yes              |                           |
| O       | K series  | 14.92                  | 0.05020 | 32.45 | 0.44      | SiO2           | Yes              |                           |
| Na      | K         | 2.83                   | 0.01192 | 3.41  | 0.08      | Albite         | Yes              |                           |

|        |          |      |         |        |      |      |     |  |
|--------|----------|------|---------|--------|------|------|-----|--|
|        | series   |      |         |        |      |      |     |  |
| P      | K series | 0.33 | 0.00182 | 0.31   | 0.03 | GaP  | Yes |  |
| S      | K series | 4.03 | 0.03471 | 5.55   | 0.10 | FeS2 | Yes |  |
| Cl     | K series | 2.96 | 0.02584 | 4.39   | 0.09 | NaCl | Yes |  |
| K      | K series | 0.06 | 0.00054 | 0.09   | 0.03 | KBr  | Yes |  |
| Total: |          |      |         | 100.00 |      |      |     |  |

Electron Image 28

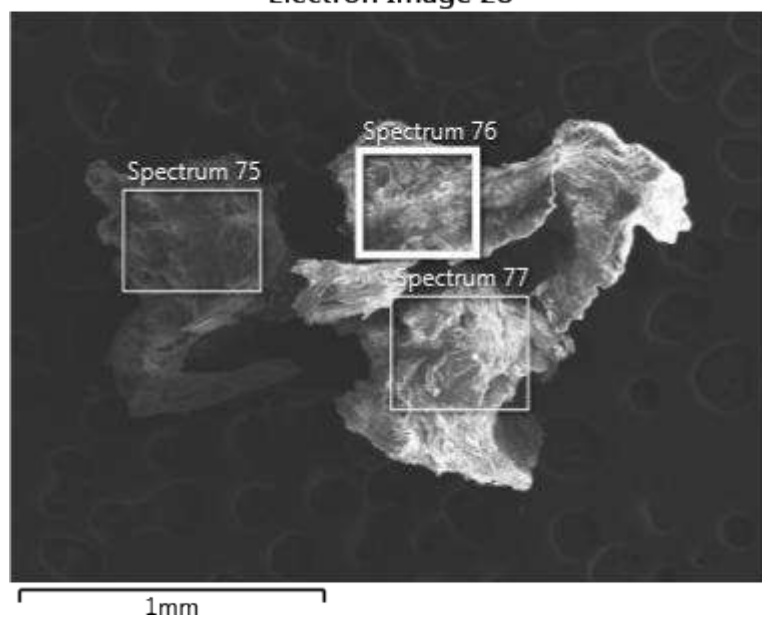

29/11/2019 10:00:04

Project 1

Cemento Mexico T1

CM1 15 Kv

Electron Image 28

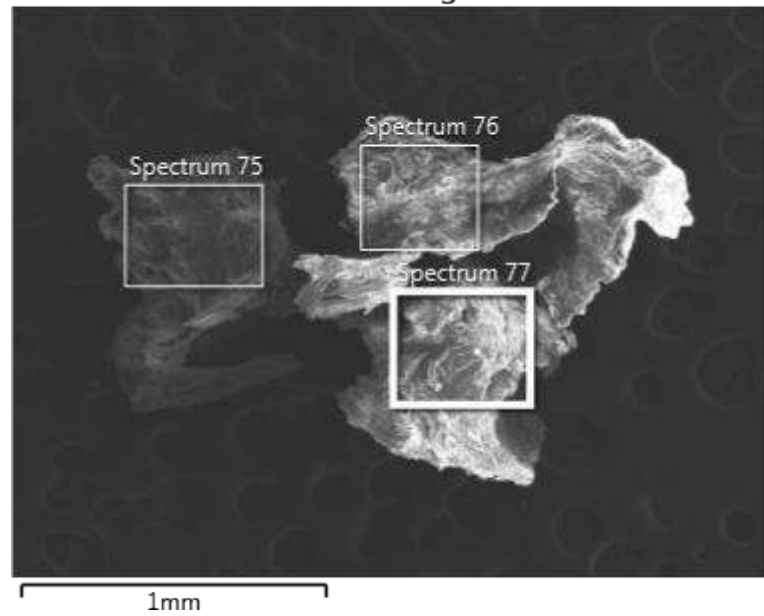

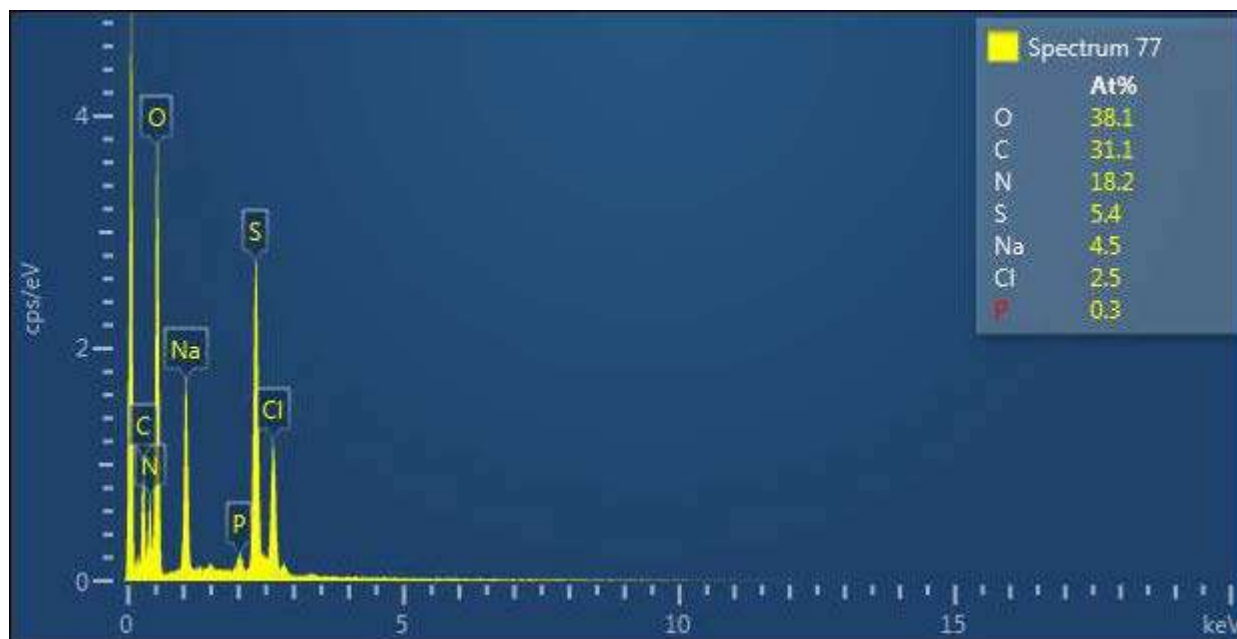

|                                 |                     |
|---------------------------------|---------------------|
| Label:                          | Spectrum 77         |
| Source:                         | Acquired            |
| Created:                        | 29/11/2019 10:00:04 |
| Livetime:                       | 60.5s               |
| Process Time:                   | 4                   |
| Accelerating Voltage:           | 15.00kV             |
| Magnification:                  | 45 x                |
| Working Distance:               | 9.9mm               |
| Specimen Tilt (degrees):        | 0.0                 |
| Elevation (degrees):            | 35.0                |
| Azimuth (degrees):              | 0.0                 |
| Number Of Channels:             | 2048                |
| Energy Range (keV):             | 20 keV              |
| Energy per Channel (eV):        | 10.0eV              |
| Detector Type Id:               | 29                  |
| Detector Type:                  | X-Max               |
| Window Type:                    | SATW                |
| Pulse Pile Up Correction:       | Succeeded           |
| Primary Detector:               | 2617                |
| Primary Detector Serial Number: | 77871-X080          |

| Element | Line Type | Apparent Concentration | k Ratio | Wt%   | Wt% Sigma | Standard Label | Factory Standard | Standard Calibration Date |
|---------|-----------|------------------------|---------|-------|-----------|----------------|------------------|---------------------------|
| C       | K series  | 1.72                   | 0.01716 | 23.21 | 0.71      | C Vit          | Yes              |                           |
| N       | K series  | 6.59                   | 0.01173 | 15.82 | 0.71      | BN             | Yes              |                           |
| O       | K series  | 10.92                  | 0.03675 | 37.83 | 0.56      | SiO2           | Yes              |                           |
| Na      | K         | 2.89                   | 0.01222 | 6.36  | 0.15      | Albite         | Yes              |                           |

|        |          |      |         |        |      |      |     |  |
|--------|----------|------|---------|--------|------|------|-----|--|
|        | series   |      |         |        |      |      |     |  |
| P      | K series | 0.30 | 0.00167 | 0.51   | 0.05 | GaP  | Yes |  |
| S      | K series | 4.26 | 0.03668 | 10.67  | 0.19 | FeS2 | Yes |  |
| Cl     | K series | 2.02 | 0.01768 | 5.60   | 0.14 | NaCl | Yes |  |
| Total: |          |      |         | 100.00 |      |      |     |  |

Electron Image 28

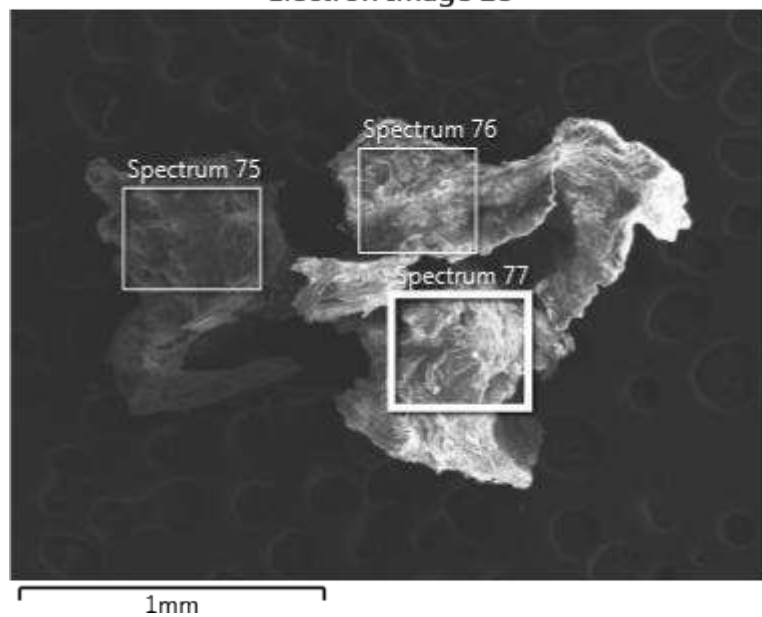

29/11/2019 10:03:41

Project 1

Cemento Mexico T1

CM2 15 Kv

Electron Image 29

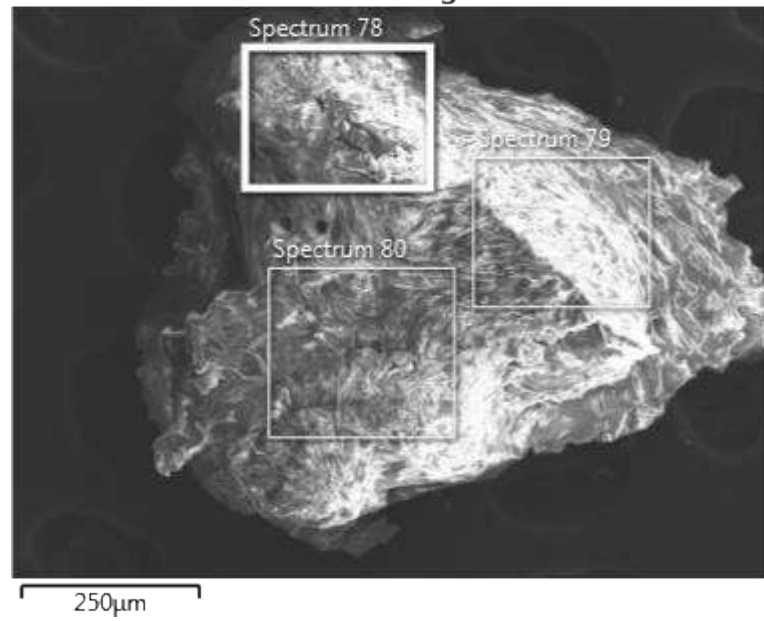

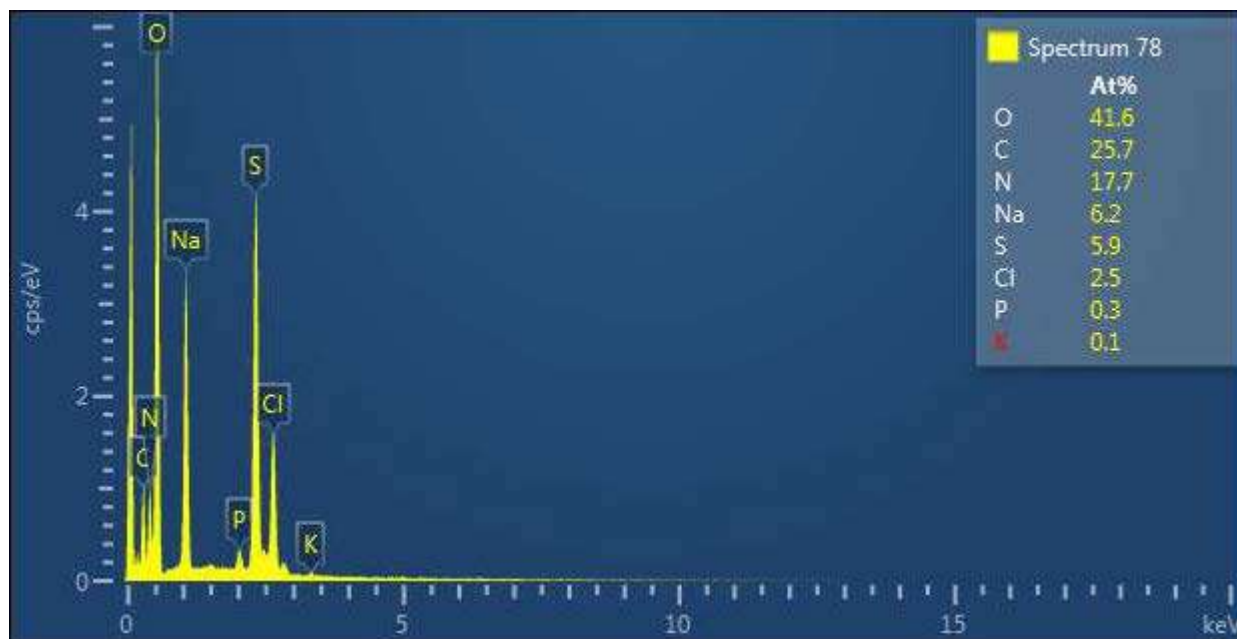

|                                 |                     |
|---------------------------------|---------------------|
| Label:                          | Spectrum 78         |
| Source:                         | Acquired            |
| Created:                        | 29/11/2019 10:03:41 |
| Livetime:                       | 60.4s               |
| Process Time:                   | 4                   |
| Accelerating Voltage:           | 15.00kV             |
| Magnification:                  | 105 x               |
| Working Distance:               | 9.9mm               |
| Specimen Tilt (degrees):        | 0.0                 |
| Elevation (degrees):            | 35.0                |
| Azimuth (degrees):              | 0.0                 |
| Number Of Channels:             | 2048                |
| Energy Range (keV):             | 20 keV              |
| Energy per Channel (eV):        | 10.0eV              |
| Detector Type Id:               | 29                  |
| Detector Type:                  | X-Max               |
| Window Type:                    | SATW                |
| Pulse Pile Up Correction:       | Succeeded           |
| Primary Detector:               | 2617                |
| Primary Detector Serial Number: | 77871-X080          |

| Element | Line Type | Apparent Concentration | k Ratio | Wt%   | Wt% Sigma | Standard Label | Factory Standard | Standard Calibration Date |
|---------|-----------|------------------------|---------|-------|-----------|----------------|------------------|---------------------------|
| C       | K series  | 1.84                   | 0.01839 | 18.61 | 0.80      | C Vit          | Yes              |                           |
| N       | K series  | 9.56                   | 0.01702 | 15.00 | 0.57      | BN             | Yes              |                           |
| O       | K series  | 17.52                  | 0.05895 | 40.14 | 0.54      | SiO2           | Yes              |                           |
| Na      | K         | 5.55                   | 0.02341 | 8.62  | 0.16      | Albite         | Yes              |                           |



|        |          |      |         |        |      |      |     |  |
|--------|----------|------|---------|--------|------|------|-----|--|
|        | series   |      |         |        |      |      |     |  |
| P      | K series | 0.47 | 0.00264 | 0.58   | 0.05 | GaP  | Yes |  |
| S      | K series | 6.42 | 0.05535 | 11.47  | 0.18 | FeS2 | Yes |  |
| Cl     | K series | 2.75 | 0.02405 | 5.43   | 0.12 | NaCl | Yes |  |
| K      | K series | 0.08 | 0.00067 | 0.15   | 0.04 | KBr  | Yes |  |
| Total: |          |      |         | 100.00 |      |      |     |  |

Electron Image 29

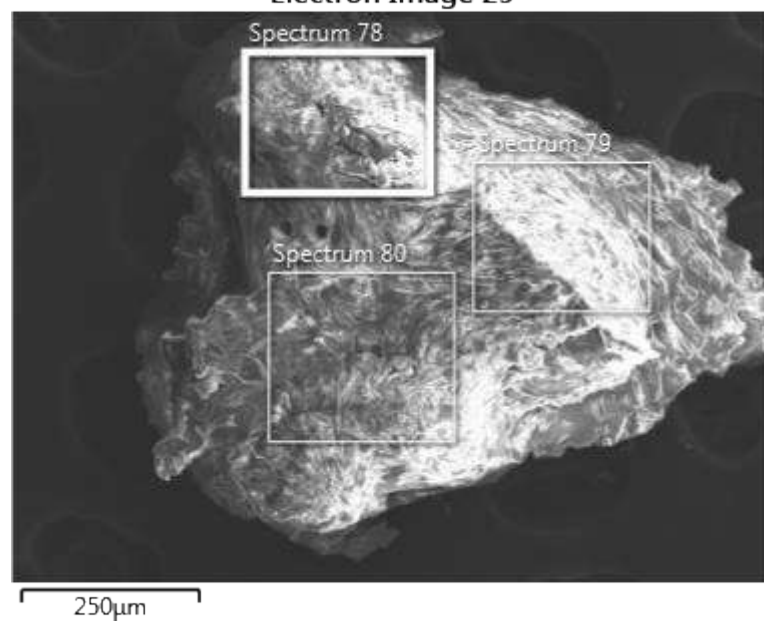

29/11/2019 10:04:49

Project 1

Cemento Mexico T1

CM2 15 Kv

Electron Image 29

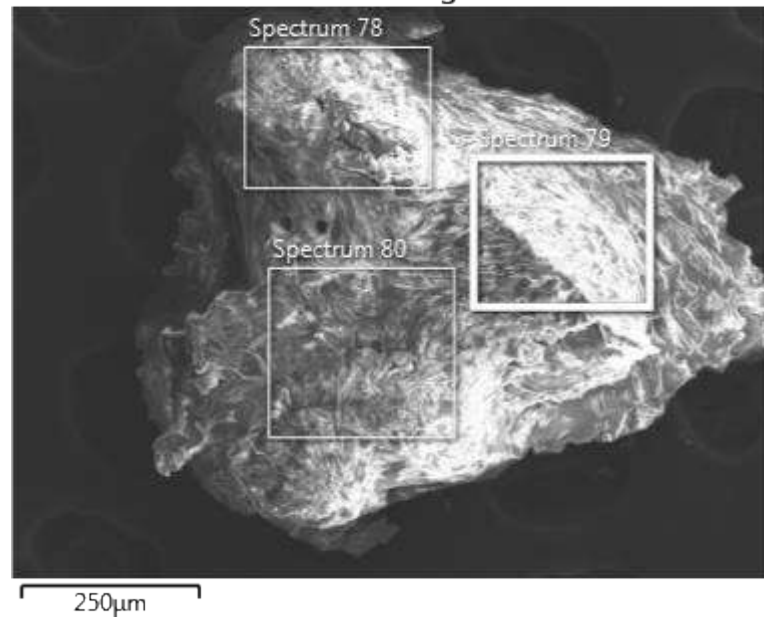

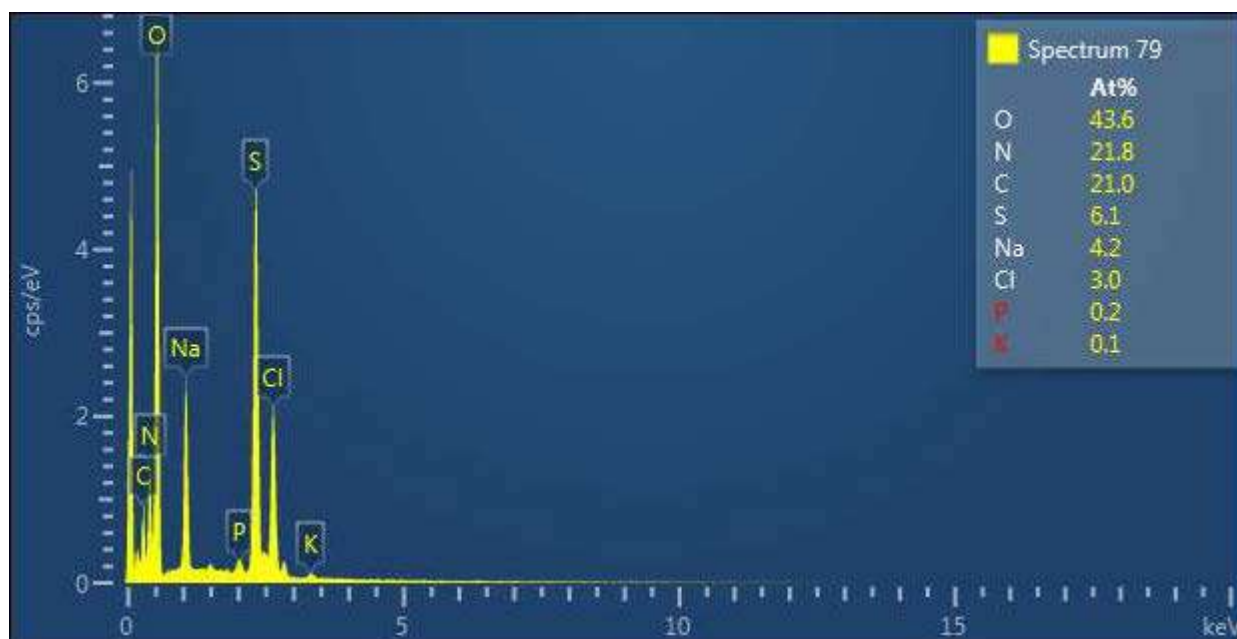

|                                 |                     |
|---------------------------------|---------------------|
| Label:                          | Spectrum 79         |
| Source:                         | Acquired            |
| Created:                        | 29/11/2019 10:04:49 |
| Livetime:                       | 60.3s               |
| Process Time:                   | 4                   |
| Accelerating Voltage:           | 15.00kV             |
| Magnification:                  | 105 x               |
| Working Distance:               | 9.9mm               |
| Specimen Tilt (degrees):        | 0.0                 |
| Elevation (degrees):            | 35.0                |
| Azimuth (degrees):              | 0.0                 |
| Number Of Channels:             | 2048                |
| Energy Range (keV):             | 20 keV              |
| Energy per Channel (eV):        | 10.0eV              |
| Detector Type Id:               | 29                  |
| Detector Type:                  | X-Max               |
| Window Type:                    | SATW                |
| Pulse Pile Up Correction:       | Succeeded           |
| Primary Detector:               | 2617                |
| Primary Detector Serial Number: | 77871-X080          |

| Element | Line Type | Apparent Concentration | k Ratio | Wt%   | Wt% Sigma | Standard Label | Factory Standard | Standard Calibration Date |
|---------|-----------|------------------------|---------|-------|-----------|----------------|------------------|---------------------------|
| C       | K series  | 1.60                   | 0.01598 | 15.17 | 0.78      | C Vit          | Yes              |                           |
| N       | K series  | 13.74                  | 0.02446 | 18.31 | 0.55      | BN             | Yes              |                           |
| O       | K series  | 19.44                  | 0.06541 | 41.89 | 0.53      | SiO2           | Yes              |                           |
| Na      | K         | 3.96                   | 0.01672 | 5.75  | 0.12      | Albite         | Yes              |                           |

|        |          |      |         |        |      |      |     |  |
|--------|----------|------|---------|--------|------|------|-----|--|
|        | series   |      |         |        |      |      |     |  |
| P      | K series | 0.33 | 0.00184 | 0.36   | 0.04 | GaP  | Yes |  |
| S      | K series | 7.34 | 0.06321 | 11.82  | 0.18 | FeS2 | Yes |  |
| Cl     | K series | 3.62 | 0.03167 | 6.48   | 0.12 | NaCl | Yes |  |
| K      | K series | 0.13 | 0.00114 | 0.23   | 0.04 | KBr  | Yes |  |
| Total: |          |      |         | 100.00 |      |      |     |  |

Electron Image 29

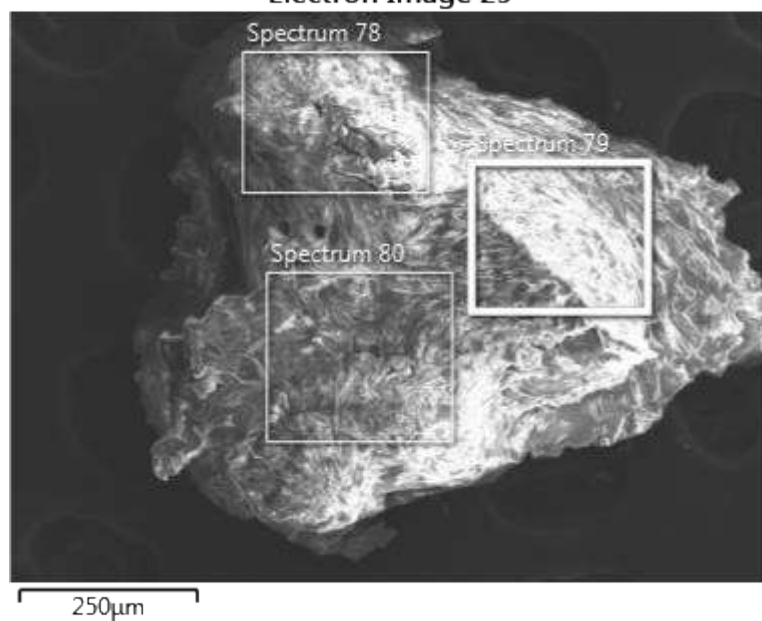

29/11/2019 10:05:58

Project 1

Cemento Mexico T1

CM2 15 Kv

Electron Image 29

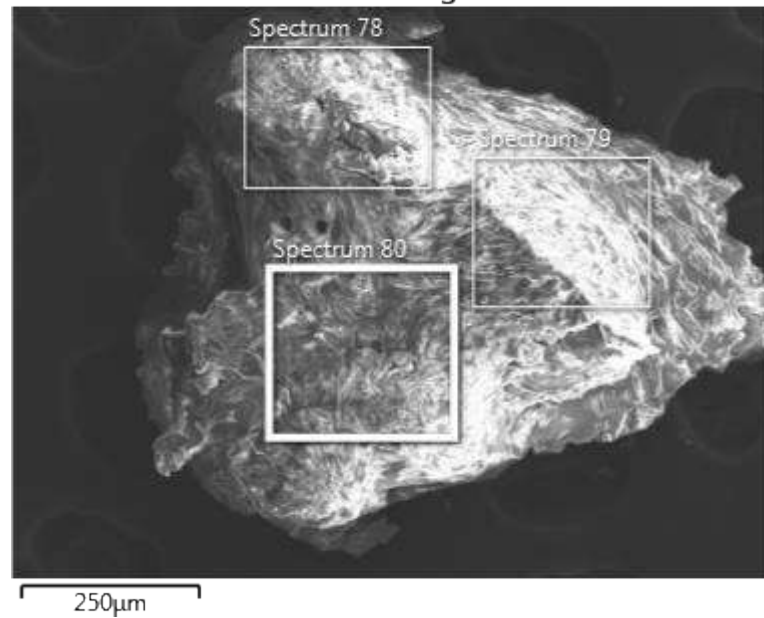

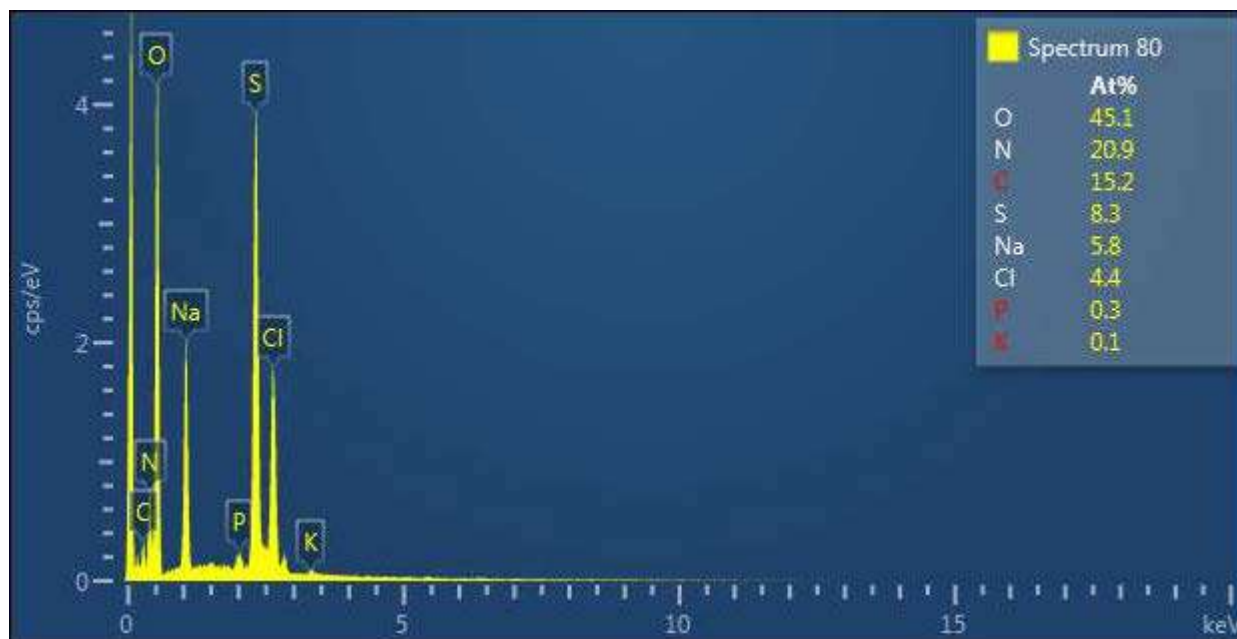

|                                 |                     |
|---------------------------------|---------------------|
| Label:                          | Spectrum 80         |
| Source:                         | Acquired            |
| Created:                        | 29/11/2019 10:05:58 |
| Livetime:                       | 60.5s               |
| Process Time:                   | 4                   |
| Accelerating Voltage:           | 15.00kV             |
| Magnification:                  | 105 x               |
| Working Distance:               | 9.9mm               |
| Specimen Tilt (degrees):        | 0.0                 |
| Elevation (degrees):            | 35.0                |
| Azimuth (degrees):              | 0.0                 |
| Number Of Channels:             | 2048                |
| Energy Range (keV):             | 20 keV              |
| Energy per Channel (eV):        | 10.0eV              |
| Detector Type Id:               | 29                  |
| Detector Type:                  | X-Max               |
| Window Type:                    | SATW                |
| Pulse Pile Up Correction:       | Succeeded           |
| Primary Detector:               | 2617                |
| Primary Detector Serial Number: | 77871-X080          |

| Element | Line Type | Apparent Concentration | k Ratio | Wt%   | Wt% Sigma | Standard Label | Factory Standard | Standard Calibration Date |
|---------|-----------|------------------------|---------|-------|-----------|----------------|------------------|---------------------------|
| C       | K series  | 0.55                   | 0.00553 | 10.38 | 1.07      | C Vit          | Yes              |                           |
| N       | K series  | 7.71                   | 0.01372 | 16.60 | 0.67      | BN             | Yes              |                           |
| O       | K series  | 12.38                  | 0.04165 | 40.90 | 0.66      | SiO2           | Yes              |                           |
| Na      | K         | 3.37                   | 0.01421 | 7.51  | 0.17      | Albite         | Yes              |                           |

|        |          |      |         |        |      |      |     |  |
|--------|----------|------|---------|--------|------|------|-----|--|
|        | series   |      |         |        |      |      |     |  |
| P      | K series | 0.28 | 0.00154 | 0.48   | 0.06 | GaP  | Yes |  |
| S      | K series | 5.99 | 0.05163 | 15.09  | 0.27 | FeS2 | Yes |  |
| Cl     | K series | 3.10 | 0.02705 | 8.81   | 0.19 | NaCl | Yes |  |
| K      | K series | 0.09 | 0.00075 | 0.24   | 0.06 | KBr  | Yes |  |
| Total: |          |      |         | 100.00 |      |      |     |  |

Electron Image 29

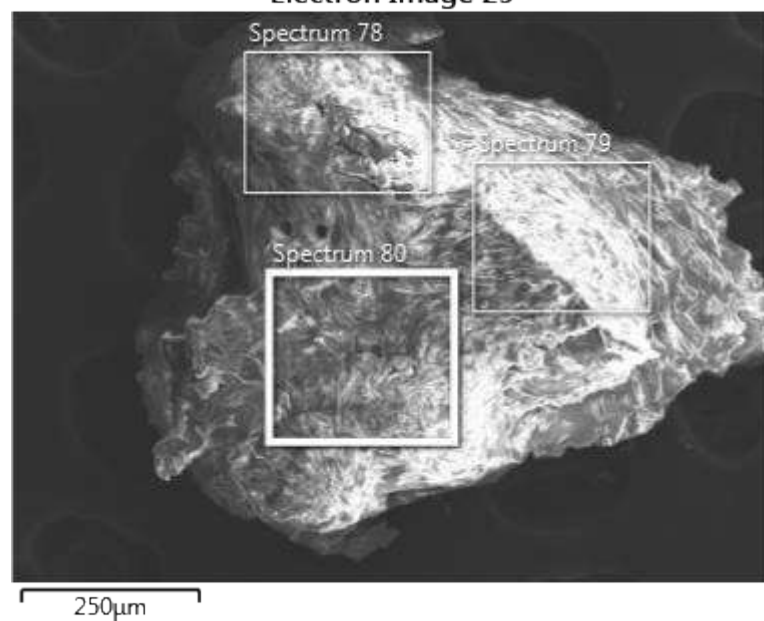

29/11/2019 10:08:40

Project 1

Cemento Mexico T1

CM3 15 Kv

Electron Image 30

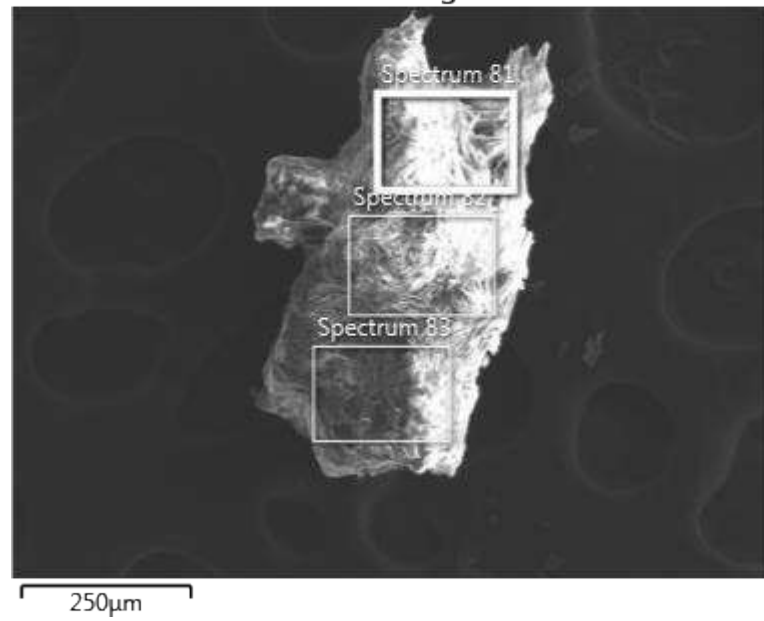



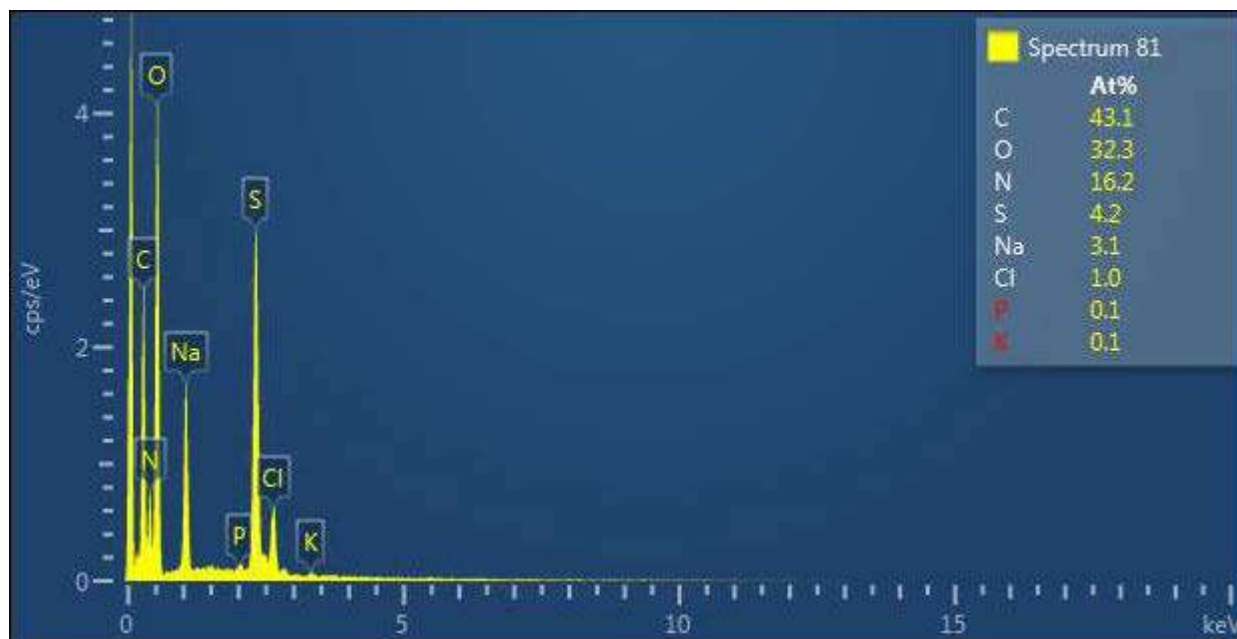

|                                 |                     |
|---------------------------------|---------------------|
| Label:                          | Spectrum 81         |
| Source:                         | Acquired            |
| Created:                        | 29/11/2019 10:08:40 |
| Livetime:                       | 60.1s               |
| Process Time:                   | 4                   |
| Accelerating Voltage:           | 15.00kV             |
| Magnification:                  | 100 x               |
| Working Distance:               | 9.9mm               |
| Specimen Tilt (degrees):        | 0.0                 |
| Elevation (degrees):            | 35.0                |
| Azimuth (degrees):              | 0.0                 |
| Number Of Channels:             | 2048                |
| Energy Range (keV):             | 20 keV              |
| Energy per Channel (eV):        | 10.0eV              |
| Detector Type Id:               | 29                  |
| Detector Type:                  | X-Max               |
| Window Type:                    | SATW                |
| Pulse Pile Up Correction:       | Succeeded           |
| Primary Detector:               | 2617                |
| Primary Detector Serial Number: | 77871-X080          |

| Element | Line Type | Apparent Concentration | k Ratio | Wt%   | Wt% Sigma | Standard Label | Factory Standard | Standard Calibration Date |
|---------|-----------|------------------------|---------|-------|-----------|----------------|------------------|---------------------------|
| C       | K series  | 4.59                   | 0.04589 | 34.39 | 0.73      | C Vit          | Yes              |                           |
| N       | K series  | 7.15                   | 0.01273 | 15.06 | 0.73      | BN             | Yes              |                           |
| O       | K series  | 11.98                  | 0.04031 | 34.29 | 0.54      | SiO2           | Yes              |                           |
| Na      | K         | 2.82                   | 0.01189 | 4.72  | 0.11      | Albite         | Yes              |                           |

|        |          |      |         |        |      |      |     |  |
|--------|----------|------|---------|--------|------|------|-----|--|
|        | series   |      |         |        |      |      |     |  |
| P      | K series | 0.12 | 0.00070 | 0.16   | 0.04 | GaP  | Yes |  |
| S      | K series | 4.64 | 0.03994 | 8.93   | 0.16 | FeS2 | Yes |  |
| Cl     | K series | 1.06 | 0.00928 | 2.24   | 0.08 | NaCl | Yes |  |
| K      | K series | 0.10 | 0.00086 | 0.20   | 0.04 | KBr  | Yes |  |
| Total: |          |      |         | 100.00 |      |      |     |  |

Electron Image 30

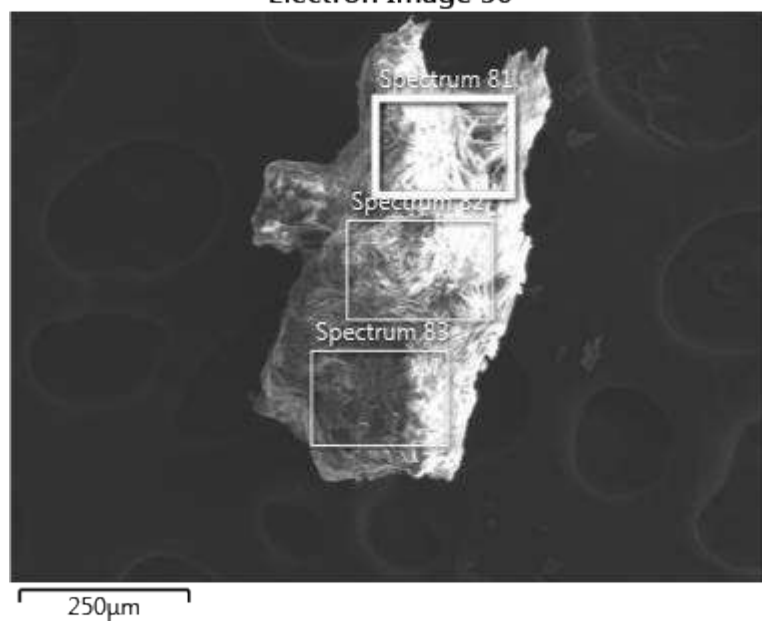

29/11/2019 10:09:50

Project 1

Cemento Mexico T1

CM3 15 Kv

Electron Image 30

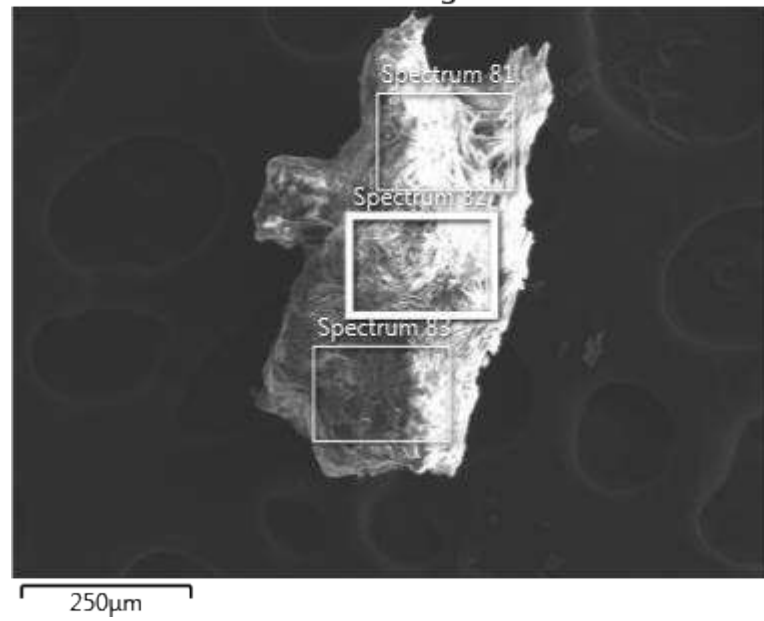

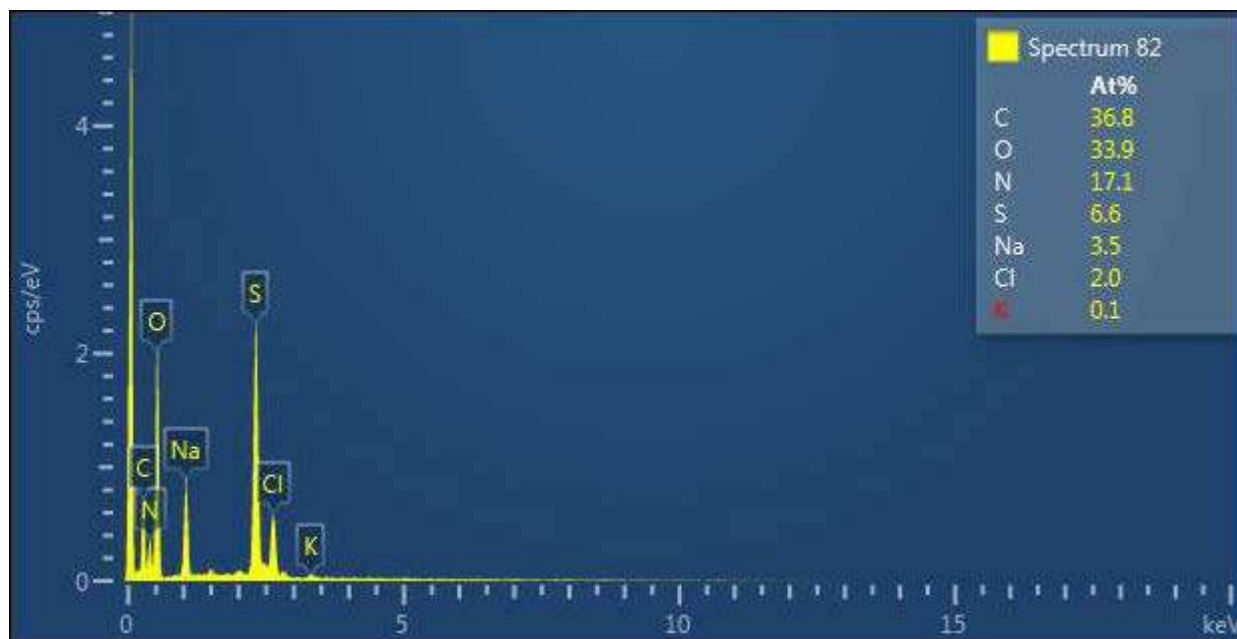

|                                 |                     |
|---------------------------------|---------------------|
| Label:                          | Spectrum 82         |
| Source:                         | Acquired            |
| Created:                        | 29/11/2019 10:09:50 |
| Livetime:                       | 60.2s               |
| Process Time:                   | 4                   |
| Accelerating Voltage:           | 15.00kV             |
| Magnification:                  | 100 x               |
| Working Distance:               | 9.9mm               |
| Specimen Tilt (degrees):        | 0.0                 |
| Elevation (degrees):            | 35.0                |
| Azimuth (degrees):              | 0.0                 |
| Number Of Channels:             | 2048                |
| Energy Range (keV):             | 20 keV              |
| Energy per Channel (eV):        | 10.0eV              |
| Detector Type Id:               | 29                  |
| Detector Type:                  | X-Max               |
| Window Type:                    | SATW                |
| Pulse Pile Up Correction:       | Succeeded           |
| Primary Detector:               | 2617                |
| Primary Detector Serial Number: | 77871-X080          |

| Element | Line Type | Apparent Concentration | k Ratio | Wt%   | Wt% Sigma | Standard Label | Factory Standard | Standard Calibration Date |
|---------|-----------|------------------------|---------|-------|-----------|----------------|------------------|---------------------------|
| C       | K series  | 1.29                   | 0.01286 | 27.81 | 1.23      | C Vit          | Yes              |                           |
| N       | K series  | 3.49                   | 0.00622 | 15.02 | 0.98      | BN             | Yes              |                           |
| O       | K series  | 5.83                   | 0.01960 | 34.07 | 0.79      | SiO2           | Yes              |                           |
| Na      | K         | 1.47                   | 0.00620 | 5.03  | 0.17      | Albite         | Yes              |                           |

|        | series   |      |         |        |      |      |     |  |
|--------|----------|------|---------|--------|------|------|-----|--|
| S      | K series | 3.41 | 0.02934 | 13.39  | 0.33 | FeS2 | Yes |  |
| Cl     | K series | 1.00 | 0.00872 | 4.41   | 0.16 | NaCl | Yes |  |
| K      | K series | 0.07 | 0.00058 | 0.28   | 0.07 | KBr  | Yes |  |
| Total: |          |      |         | 100.00 |      |      |     |  |

Electron Image 30

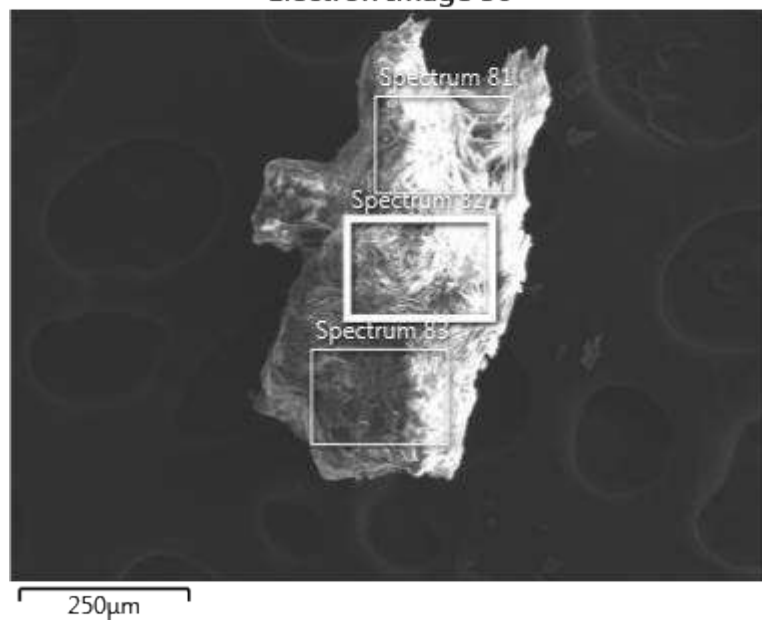

29/11/2019 10:10:59

Project 1

Cemento Mexico T1

CM3 15 Kv

Electron Image 30

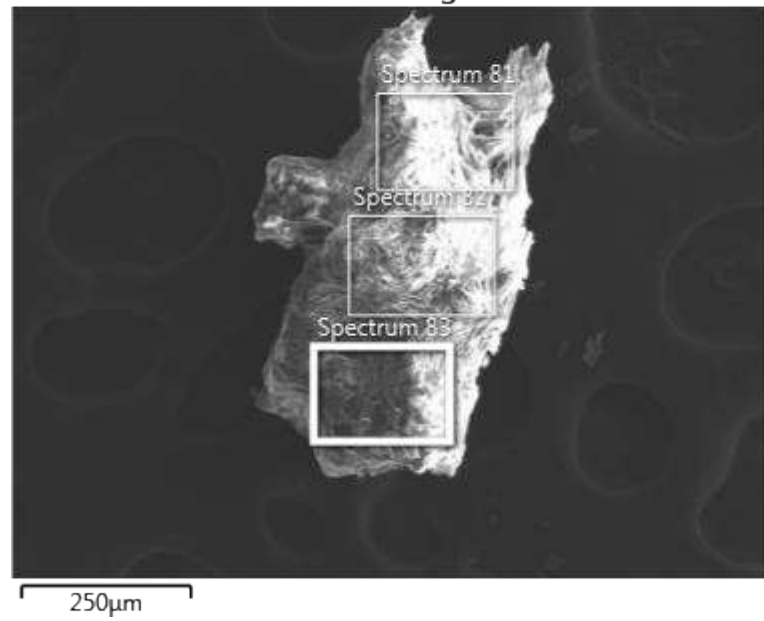

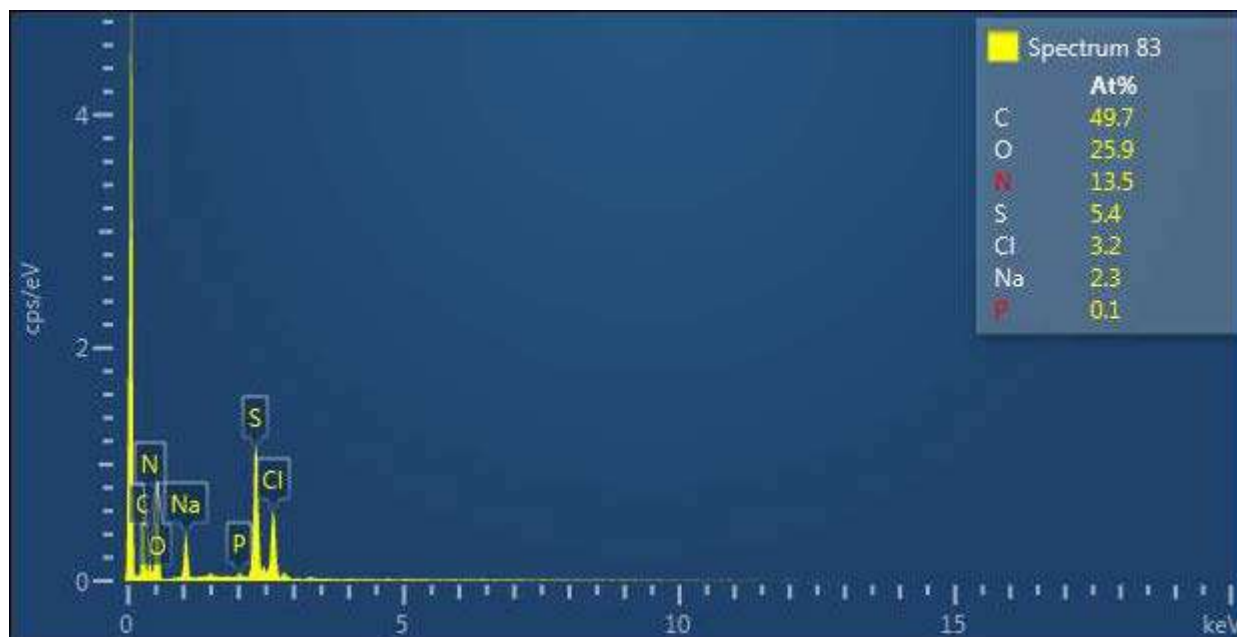

|                                 |                     |
|---------------------------------|---------------------|
| Label:                          | Spectrum 83         |
| Source:                         | Acquired            |
| Created:                        | 29/11/2019 10:10:59 |
| Livetime:                       | 60.4s               |
| Process Time:                   | 4                   |
| Accelerating Voltage:           | 15.00kV             |
| Magnification:                  | 100 x               |
| Working Distance:               | 9.9mm               |
| Specimen Tilt (degrees):        | 0.0                 |
| Elevation (degrees):            | 35.0                |
| Azimuth (degrees):              | 0.0                 |
| Number Of Channels:             | 2048                |
| Energy Range (keV):             | 20 keV              |
| Energy per Channel (eV):        | 10.0eV              |
| Detector Type Id:               | 29                  |
| Detector Type:                  | X-Max               |
| Window Type:                    | SATW                |
| Pulse Pile Up Correction:       | Succeeded           |
| Primary Detector:               | 2617                |
| Primary Detector Serial Number: | 77871-X080          |

| Element | Line Type | Apparent Concentration | k Ratio | Wt%   | Wt% Sigma | Standard Label | Factory Standard | Standard Calibration Date |
|---------|-----------|------------------------|---------|-------|-----------|----------------|------------------|---------------------------|
| C       | K series  | 1.11                   | 0.01114 | 38.72 | 1.25      | C Vit          | Yes              |                           |
| N       | K series  | 1.43                   | 0.00254 | 12.24 | 1.40      | BN             | Yes              |                           |
| O       | K series  | 2.59                   | 0.00873 | 26.87 | 0.84      | SiO2           | Yes              |                           |
| Na      | K         | 0.65                   | 0.00275 | 3.44  | 0.17      | Albite         | Yes              |                           |

|        |          |      |         |        |      |      |     |  |
|--------|----------|------|---------|--------|------|------|-----|--|
|        | series   |      |         |        |      |      |     |  |
| P      | K series | 0.05 | 0.00030 | 0.23   | 0.07 | GaP  | Yes |  |
| S      | K series | 1.81 | 0.01561 | 11.25  | 0.35 | FeS2 | Yes |  |
| Cl     | K series | 1.05 | 0.00914 | 7.25   | 0.27 | NaCl | Yes |  |
| Total: |          |      |         | 100.00 |      |      |     |  |

Electron Image 30

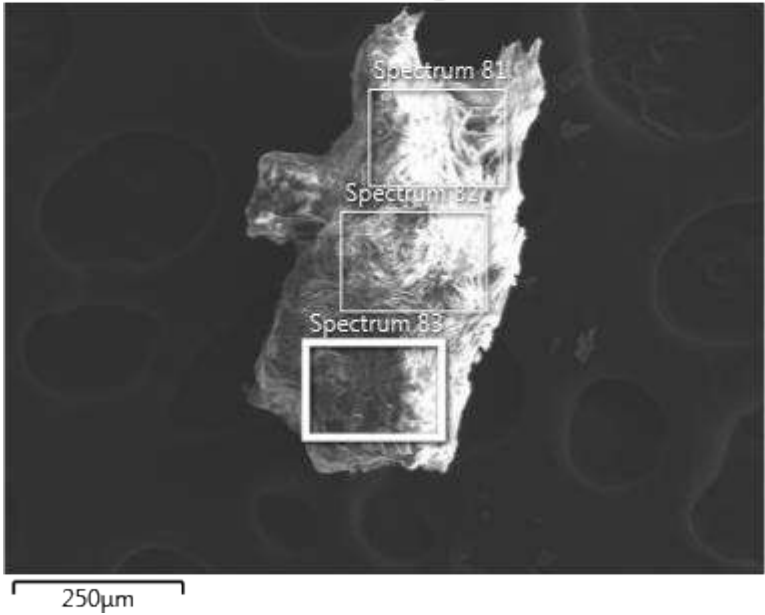



29/11/2019 10:14:48

Project 1

Cemento Mexico T2

CM1 15 Kv

Electron Image 31

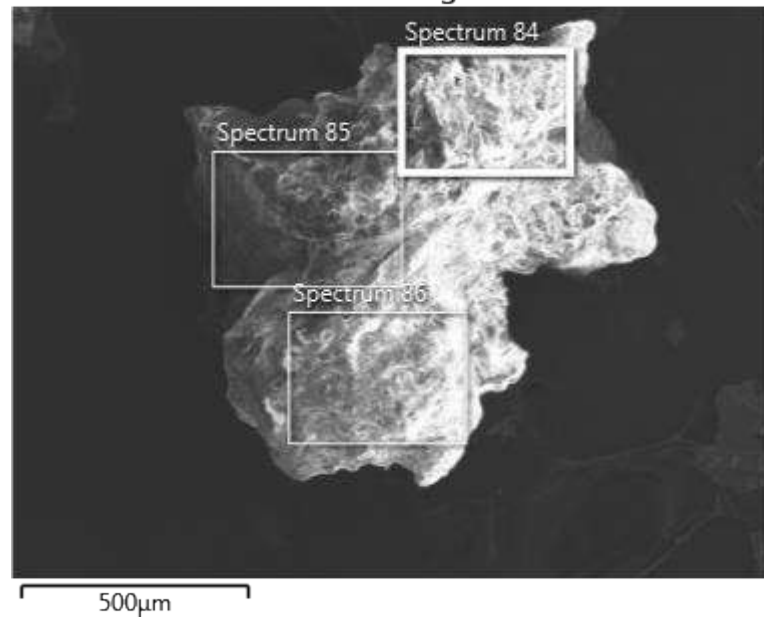

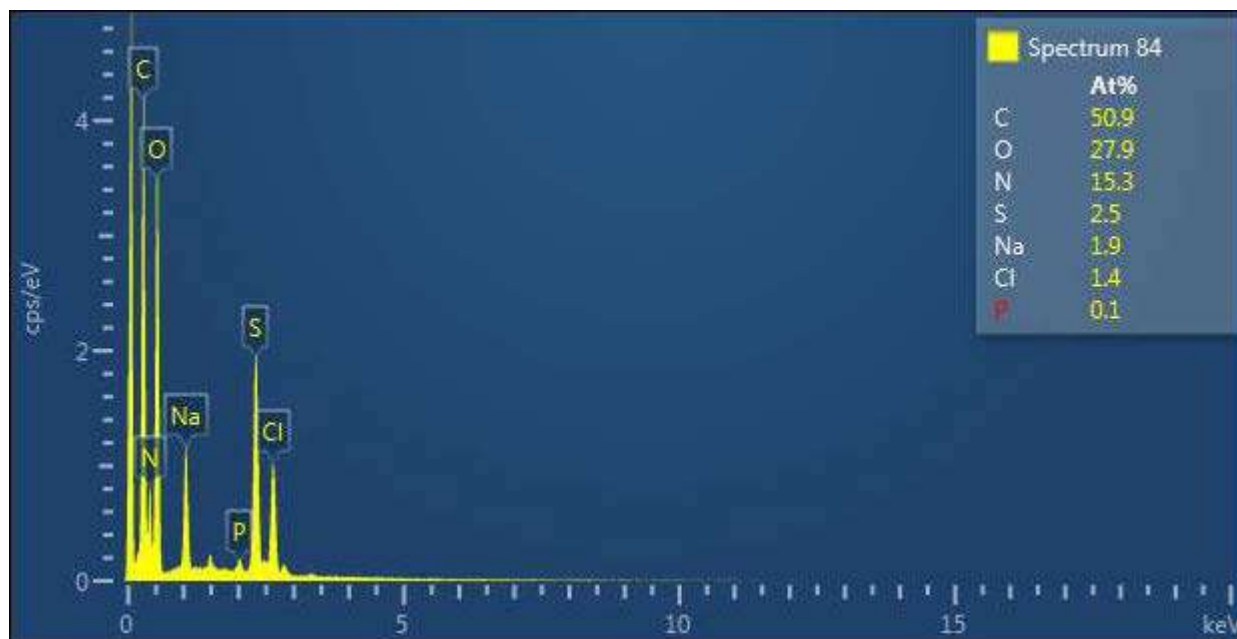

|                                 |                     |
|---------------------------------|---------------------|
| Label:                          | Spectrum 84         |
| Source:                         | Acquired            |
| Created:                        | 29/11/2019 10:14:48 |
| Livetime:                       | 60.4s               |
| Process Time:                   | 4                   |
| Accelerating Voltage:           | 15.00kV             |
| Magnification:                  | 67 x                |
| Working Distance:               | 9.9mm               |
| Specimen Tilt (degrees):        | 0.0                 |
| Elevation (degrees):            | 35.0                |
| Azimuth (degrees):              | 0.0                 |
| Number Of Channels:             | 2048                |
| Energy Range (keV):             | 20 keV              |
| Energy per Channel (eV):        | 10.0eV              |
| Detector Type Id:               | 29                  |
| Detector Type:                  | X-Max               |
| Window Type:                    | SATW                |
| Pulse Pile Up Correction:       | Succeeded           |
| Primary Detector:               | 2617                |
| Primary Detector Serial Number: | 77871-X080          |

| Element | Line Type | Apparent Concentration | k Ratio | Wt%   | Wt% Sigma | Standard Label | Factory Standard | Standard Calibration Date |
|---------|-----------|------------------------|---------|-------|-----------|----------------|------------------|---------------------------|
| C       | K series  | 6.84                   | 0.06844 | 42.16 | 0.60      | C Vit          | Yes              |                           |
| N       | K series  | 6.52                   | 0.01161 | 14.76 | 0.79      | BN             | Yes              |                           |
| O       | K series  | 10.44                  | 0.03514 | 30.77 | 0.47      | SiO2           | Yes              |                           |
| Na      | K         | 1.89                   | 0.00797 | 3.00  | 0.09      | Albite         | Yes              |                           |

|        |          |      |         |        |      |      |     |  |
|--------|----------|------|---------|--------|------|------|-----|--|
|        | series   |      |         |        |      |      |     |  |
| P      | K series | 0.22 | 0.00121 | 0.27   | 0.04 | GaP  | Yes |  |
| S      | K series | 3.01 | 0.02597 | 5.53   | 0.11 | FeS2 | Yes |  |
| Cl     | K series | 1.77 | 0.01547 | 3.50   | 0.09 | NaCl | Yes |  |
| Total: |          |      |         | 100.00 |      |      |     |  |

Electron Image 31

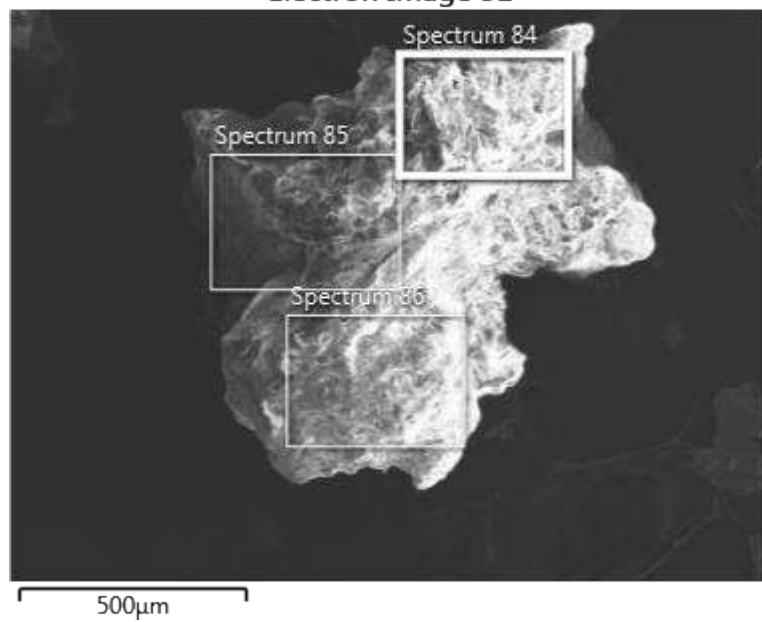

29/11/2019 10:15:57

Project 1

Cemento Mexico T2

CM1 15 Kv

Electron Image 31

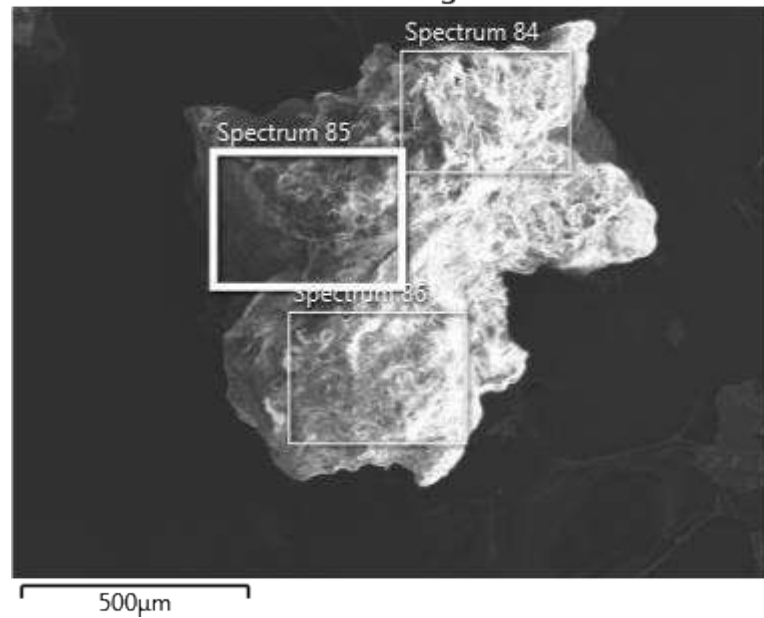

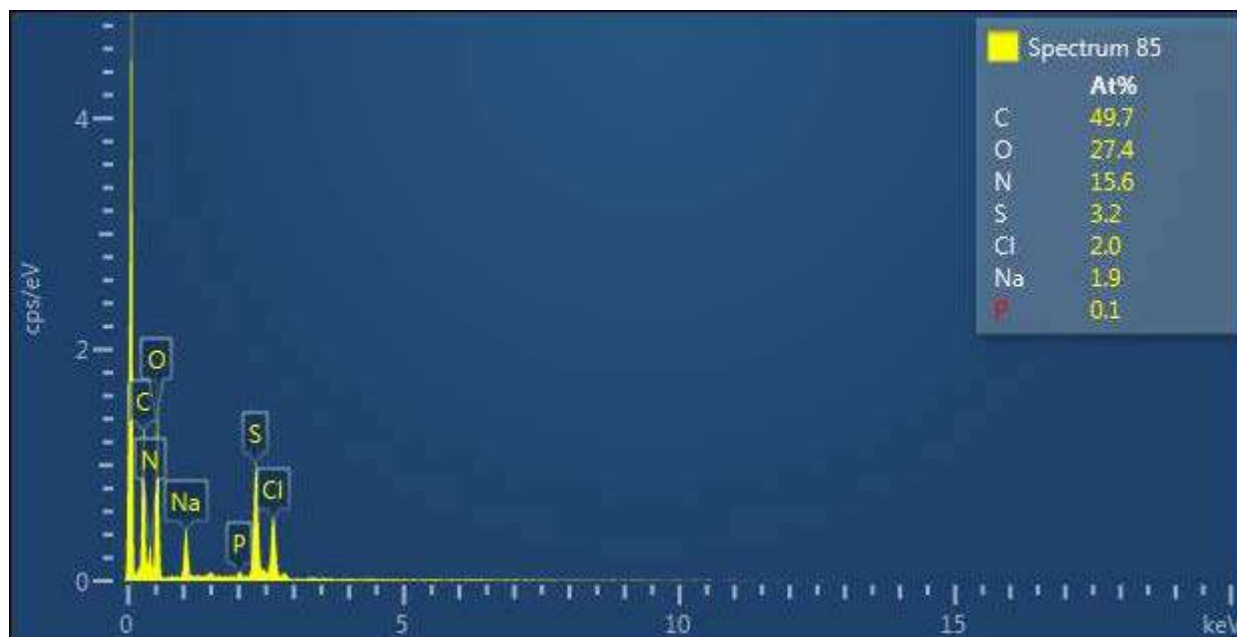

|                                 |                     |
|---------------------------------|---------------------|
| Label:                          | Spectrum 85         |
| Source:                         | Acquired            |
| Created:                        | 29/11/2019 10:15:57 |
| Livetime:                       | 60.4s               |
| Process Time:                   | 4                   |
| Accelerating Voltage:           | 15.00kV             |
| Magnification:                  | 67 x                |
| Working Distance:               | 9.9mm               |
| Specimen Tilt (degrees):        | 0.0                 |
| Elevation (degrees):            | 35.0                |
| Azimuth (degrees):              | 0.0                 |
| Number Of Channels:             | 2048                |
| Energy Range (keV):             | 20 keV              |
| Energy per Channel (eV):        | 10.0eV              |
| Detector Type Id:               | 29                  |
| Detector Type:                  | X-Max               |
| Window Type:                    | SATW                |
| Pulse Pile Up Correction:       | Succeeded           |
| Primary Detector:               | 2617                |
| Primary Detector Serial Number: | 77871-X080          |

| Element | Line Type | Apparent Concentration | k Ratio | Wt%   | Wt% Sigma | Standard Label | Factory Standard | Standard Calibration Date |
|---------|-----------|------------------------|---------|-------|-----------|----------------|------------------|---------------------------|
| C       | K series  | 2.22                   | 0.02218 | 40.44 | 0.97      | C Vit          | Yes              |                           |
| N       | K series  | 2.56                   | 0.00457 | 14.76 | 1.22      | BN             | Yes              |                           |
| O       | K series  | 3.98                   | 0.01340 | 29.71 | 0.73      | SiO2           | Yes              |                           |
| Na      | K         | 0.77                   | 0.00324 | 3.03  | 0.13      | Albite         | Yes              |                           |

|        |          |      |         |        |      |      |     |  |
|--------|----------|------|---------|--------|------|------|-----|--|
|        | series   |      |         |        |      |      |     |  |
| P      | K series | 0.09 | 0.00053 | 0.29   | 0.06 | GaP  | Yes |  |
| S      | K series | 1.51 | 0.01305 | 6.92   | 0.21 | FeS2 | Yes |  |
| Cl     | K series | 0.97 | 0.00851 | 4.84   | 0.17 | NaCl | Yes |  |
| Total: |          |      |         | 100.00 |      |      |     |  |

Electron Image 31

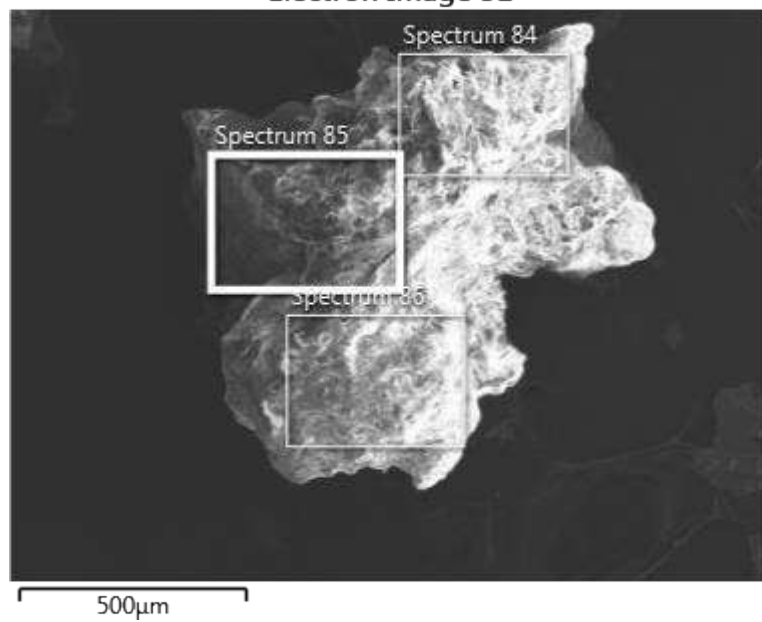

29/11/2019 10:17:05

Project 1

Cemento Mexico T2

CM1 15 Kv

Electron Image 31

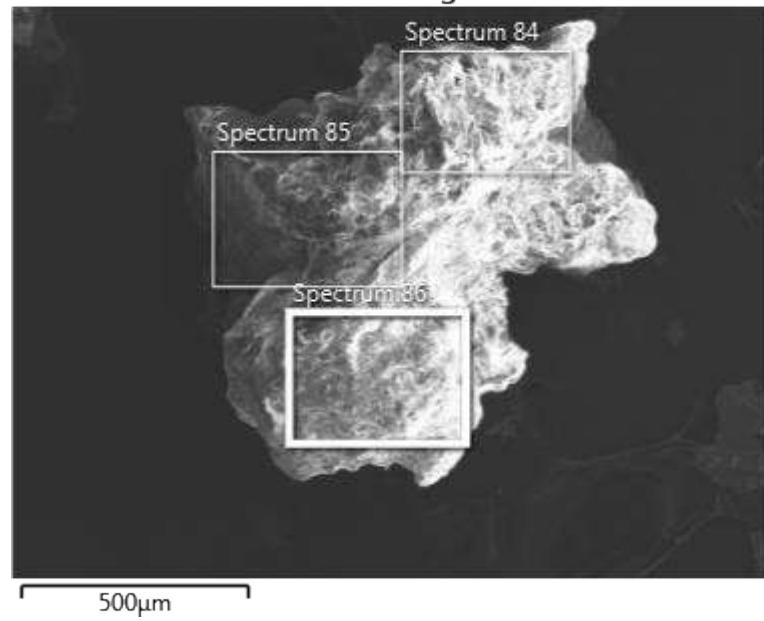

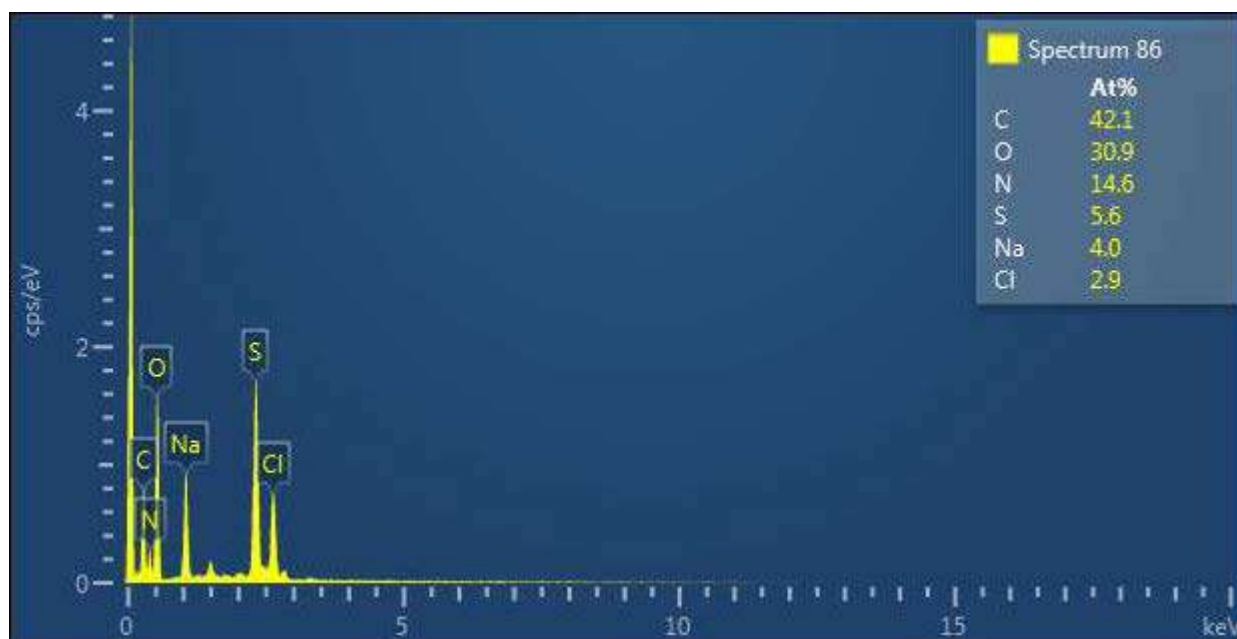

|                                 |                     |
|---------------------------------|---------------------|
| Label:                          | Spectrum 86         |
| Source:                         | Acquired            |
| Created:                        | 29/11/2019 10:17:05 |
| Livetime:                       | 60.4s               |
| Process Time:                   | 4                   |
| Accelerating Voltage:           | 15.00kV             |
| Magnification:                  | 67 x                |
| Working Distance:               | 9.9mm               |
| Specimen Tilt (degrees):        | 0.0                 |
| Elevation (degrees):            | 35.0                |
| Azimuth (degrees):              | 0.0                 |
| Number Of Channels:             | 2048                |
| Energy Range (keV):             | 20 keV              |
| Energy per Channel (eV):        | 10.0eV              |
| Detector Type Id:               | 29                  |
| Detector Type:                  | X-Max               |
| Window Type:                    | SATW                |
| Pulse Pile Up Correction:       | Succeeded           |
| Primary Detector:               | 2617                |
| Primary Detector Serial Number: | 77871-X080          |

| Element | Line Type | Apparent Concentration | k Ratio | Wt%   | Wt% Sigma | Standard Label | Factory Standard | Standard Calibration Date |
|---------|-----------|------------------------|---------|-------|-----------|----------------|------------------|---------------------------|
| C       | K series  | 1.31                   | 0.01309 | 32.02 | 0.98      | C Vit          | Yes              |                           |
| N       | K series  | 2.46                   | 0.00439 | 12.92 | 1.07      | BN             | Yes              |                           |
| O       | K series  | 4.71                   | 0.01585 | 31.30 | 0.71      | SiO2           | Yes              |                           |
| Na      | K         | 1.56                   | 0.00658 | 5.82  | 0.19      | Albite         | Yes              |                           |



|        |          |      |         |        |      |      |     |  |
|--------|----------|------|---------|--------|------|------|-----|--|
|        | series   |      |         |        |      |      |     |  |
| S      | K series | 2.61 | 0.02246 | 11.39  | 0.28 | FeS2 | Yes |  |
| Cl     | K series | 1.34 | 0.01175 | 6.54   | 0.20 | NaCl | Yes |  |
| Total: |          |      |         | 100.00 |      |      |     |  |

Electron Image 31

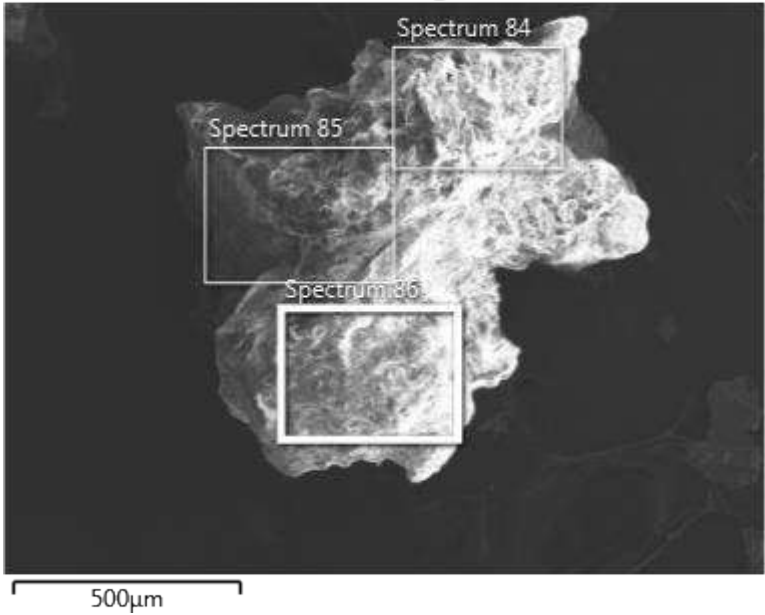

29/11/2019 10:19:18

Project 1

Cemento Mexico T2

CM2 15 Kv

Electron Image 32

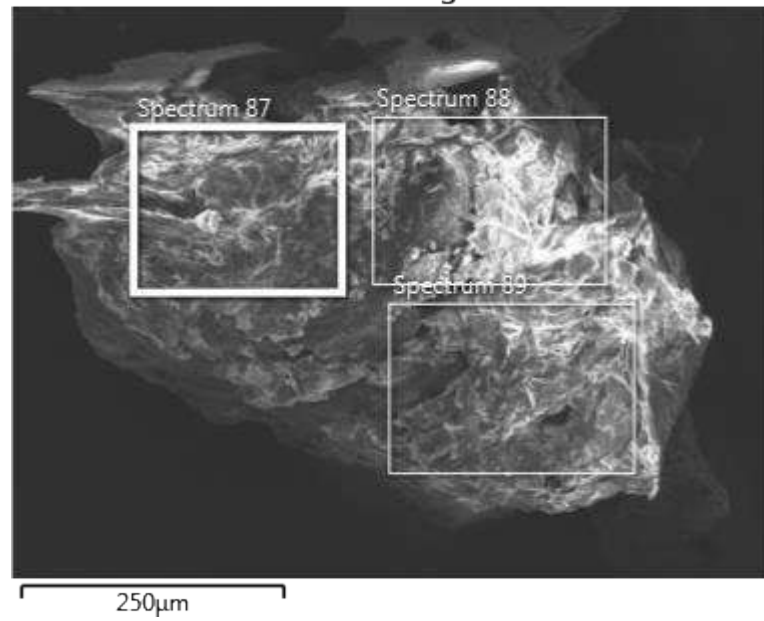

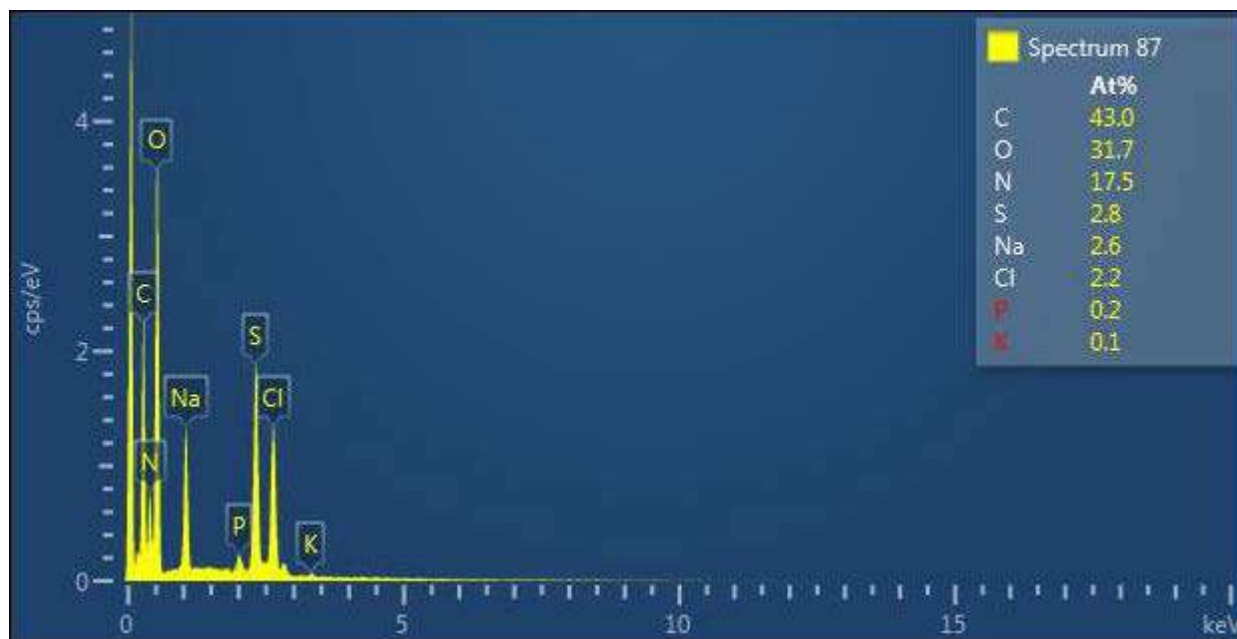

|                                 |                     |
|---------------------------------|---------------------|
| Label:                          | Spectrum 87         |
| Source:                         | Acquired            |
| Created:                        | 29/11/2019 10:19:18 |
| Livetime:                       | 60.4s               |
| Process Time:                   | 4                   |
| Accelerating Voltage:           | 15.00kV             |
| Magnification:                  | 155 x               |
| Working Distance:               | 9.9mm               |
| Specimen Tilt (degrees):        | 0.0                 |
| Elevation (degrees):            | 35.0                |
| Azimuth (degrees):              | 0.0                 |
| Number Of Channels:             | 2048                |
| Energy Range (keV):             | 20 keV              |
| Energy per Channel (eV):        | 10.0eV              |
| Detector Type Id:               | 29                  |
| Detector Type:                  | X-Max               |
| Window Type:                    | SATW                |
| Pulse Pile Up Correction:       | Succeeded           |
| Primary Detector:               | 2617                |
| Primary Detector Serial Number: | 77871-X080          |

| Element | Line Type | Apparent Concentration | k Ratio | Wt%   | Wt% Sigma | Standard Label | Factory Standard | Standard Calibration Date |
|---------|-----------|------------------------|---------|-------|-----------|----------------|------------------|---------------------------|
| C       | K series  | 4.10                   | 0.04105 | 34.33 | 0.78      | C Vit          | Yes              |                           |
| N       | K series  | 7.02                   | 0.01250 | 16.25 | 0.77      | BN             | Yes              |                           |
| O       | K series  | 10.48                  | 0.03525 | 33.75 | 0.57      | SiO2           | Yes              |                           |
| Na      | K         | 2.13                   | 0.00899 | 3.92  | 0.11      | Albite         | Yes              |                           |

|        |          |      |         |        |      |      |     |  |
|--------|----------|------|---------|--------|------|------|-----|--|
|        | series   |      |         |        |      |      |     |  |
| P      | K series | 0.31 | 0.00172 | 0.44   | 0.04 | GaP  | Yes |  |
| S      | K series | 2.81 | 0.02424 | 5.90   | 0.13 | FeS2 | Yes |  |
| Cl     | K series | 2.33 | 0.02033 | 5.26   | 0.13 | NaCl | Yes |  |
| K      | K series | 0.07 | 0.00062 | 0.16   | 0.04 | KBr  | Yes |  |
| Total: |          |      |         | 100.00 |      |      |     |  |

Electron Image 32

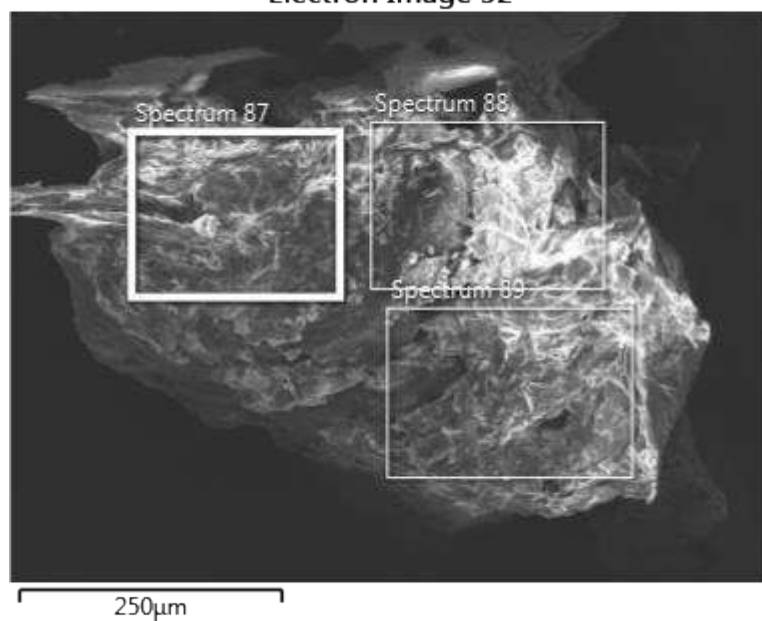

29/11/2019 10:20:26

Project 1

Cemento Mexico T2

CM2 15 Kv

Electron Image 32

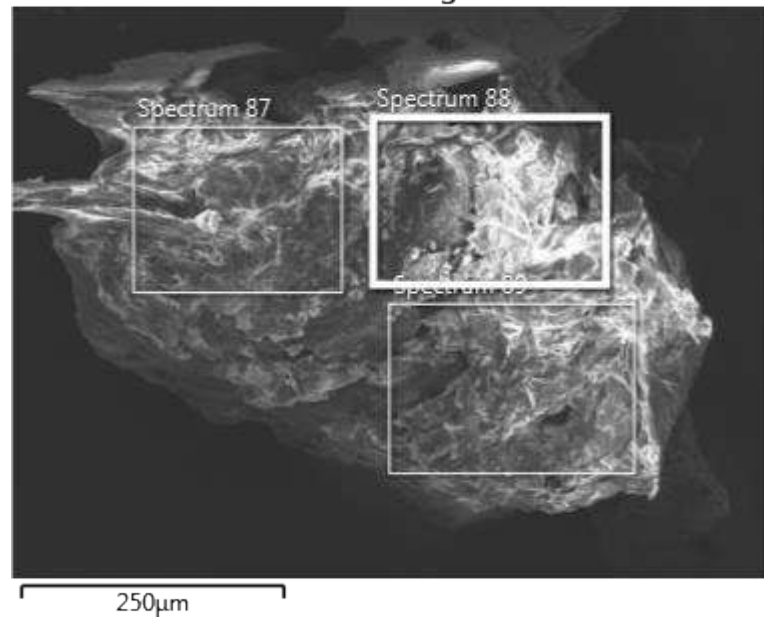

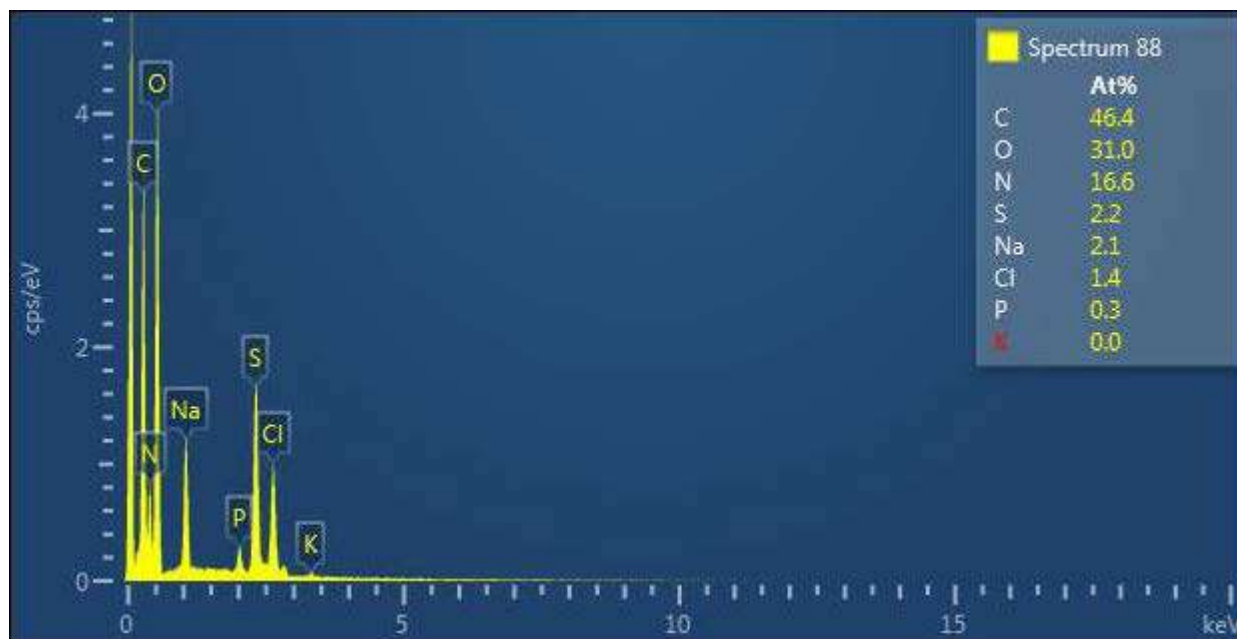

|                                 |                     |
|---------------------------------|---------------------|
| Label:                          | Spectrum 88         |
| Source:                         | Acquired            |
| Created:                        | 29/11/2019 10:20:26 |
| Livetime:                       | 60.0s               |
| Process Time:                   | 4                   |
| Accelerating Voltage:           | 15.00kV             |
| Magnification:                  | 155 x               |
| Working Distance:               | 9.9mm               |
| Specimen Tilt (degrees):        | 0.0                 |
| Elevation (degrees):            | 35.0                |
| Azimuth (degrees):              | 0.0                 |
| Number Of Channels:             | 2048                |
| Energy Range (keV):             | 20 keV              |
| Energy per Channel (eV):        | 10.0eV              |
| Detector Type Id:               | 29                  |
| Detector Type:                  | X-Max               |
| Window Type:                    | SATW                |
| Pulse Pile Up Correction:       | Succeeded           |
| Primary Detector:               | 2617                |
| Primary Detector Serial Number: | 77871-X080          |

| Element | Line Type | Apparent Concentration | k Ratio | Wt%   | Wt% Sigma | Standard Label | Factory Standard | Standard Calibration Date |
|---------|-----------|------------------------|---------|-------|-----------|----------------|------------------|---------------------------|
| C       | K series  | 6.18                   | 0.06182 | 38.11 | 0.69      | C Vit          | Yes              |                           |
| N       | K series  | 7.50                   | 0.01335 | 15.89 | 0.75      | BN             | Yes              |                           |
| O       | K series  | 11.64                  | 0.03918 | 33.89 | 0.53      | SiO2           | Yes              |                           |
| Na      | K         | 1.98                   | 0.00835 | 3.29  | 0.09      | Albite         | Yes              |                           |

|        |          |      |         |        |      |      |     |  |
|--------|----------|------|---------|--------|------|------|-----|--|
|        | series   |      |         |        |      |      |     |  |
| P      | K series | 0.45 | 0.00254 | 0.59   | 0.04 | GaP  | Yes |  |
| S      | K series | 2.55 | 0.02198 | 4.83   | 0.11 | FeS2 | Yes |  |
| Cl     | K series | 1.61 | 0.01409 | 3.27   | 0.09 | NaCl | Yes |  |
| K      | K series | 0.06 | 0.00054 | 0.12   | 0.04 | KBr  | Yes |  |
| Total: |          |      |         | 100.00 |      |      |     |  |

Electron Image 32

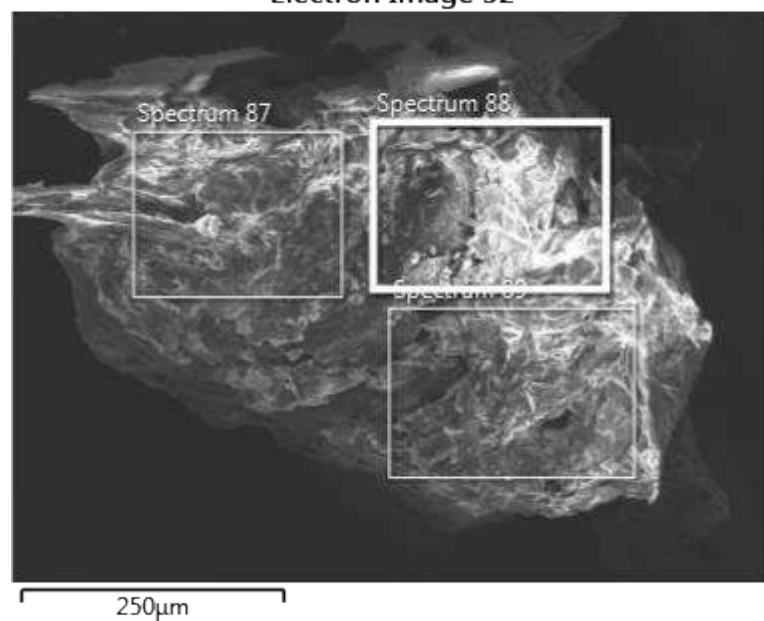

29/11/2019 10:21:33

Project 1

Cemento Mexico T2

CM2 15 Kv

Electron Image 32

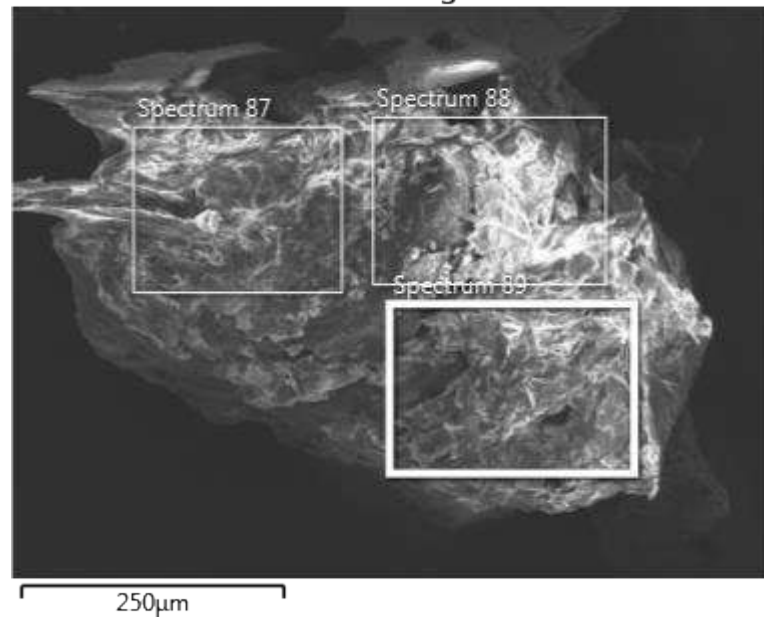



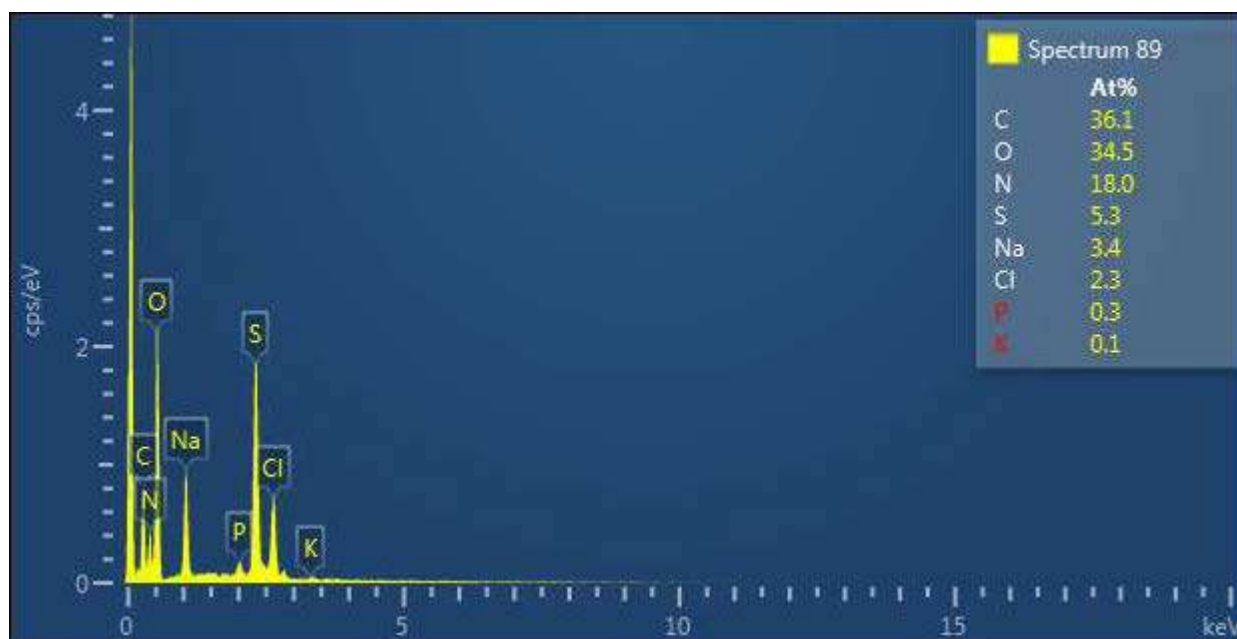

|                                 |                     |
|---------------------------------|---------------------|
| Label:                          | Spectrum 89         |
| Source:                         | Acquired            |
| Created:                        | 29/11/2019 10:21:33 |
| Livetime:                       | 60.3s               |
| Process Time:                   | 4                   |
| Accelerating Voltage:           | 15.00kV             |
| Magnification:                  | 155 x               |
| Working Distance:               | 9.9mm               |
| Specimen Tilt (degrees):        | 0.0                 |
| Elevation (degrees):            | 35.0                |
| Azimuth (degrees):              | 0.0                 |
| Number Of Channels:             | 2048                |
| Energy Range (keV):             | 20 keV              |
| Energy per Channel (eV):        | 10.0eV              |
| Detector Type Id:               | 29                  |
| Detector Type:                  | X-Max               |
| Window Type:                    | SATW                |
| Pulse Pile Up Correction:       | Succeeded           |
| Primary Detector:               | 2617                |
| Primary Detector Serial Number: | 77871-X080          |

| Element | Line Type | Apparent Concentration | k Ratio | Wt%   | Wt% Sigma | Standard Label | Factory Standard | Standard Calibration Date |
|---------|-----------|------------------------|---------|-------|-----------|----------------|------------------|---------------------------|
| C       | K series  | 1.45                   | 0.01454 | 27.48 | 1.18      | C Vit          | Yes              |                           |
| N       | K series  | 4.16                   | 0.00740 | 15.97 | 0.95      | BN             | Yes              |                           |
| O       | K series  | 6.48                   | 0.02181 | 34.99 | 0.78      | SiO2           | Yes              |                           |
| Na      | K         | 1.55                   | 0.00652 | 4.94  | 0.16      | Albite         | Yes              |                           |

|        |          |      |         |        |      |      |     |  |
|--------|----------|------|---------|--------|------|------|-----|--|
|        | series   |      |         |        |      |      |     |  |
| P      | K series | 0.24 | 0.00135 | 0.61   | 0.07 | GaP  | Yes |  |
| S      | K series | 2.91 | 0.02509 | 10.67  | 0.27 | FeS2 | Yes |  |
| Cl     | K series | 1.26 | 0.01101 | 5.10   | 0.17 | NaCl | Yes |  |
| K      | K series | 0.06 | 0.00053 | 0.24   | 0.06 | KBr  | Yes |  |
| Total: |          |      |         | 100.00 |      |      |     |  |

Electron Image 32

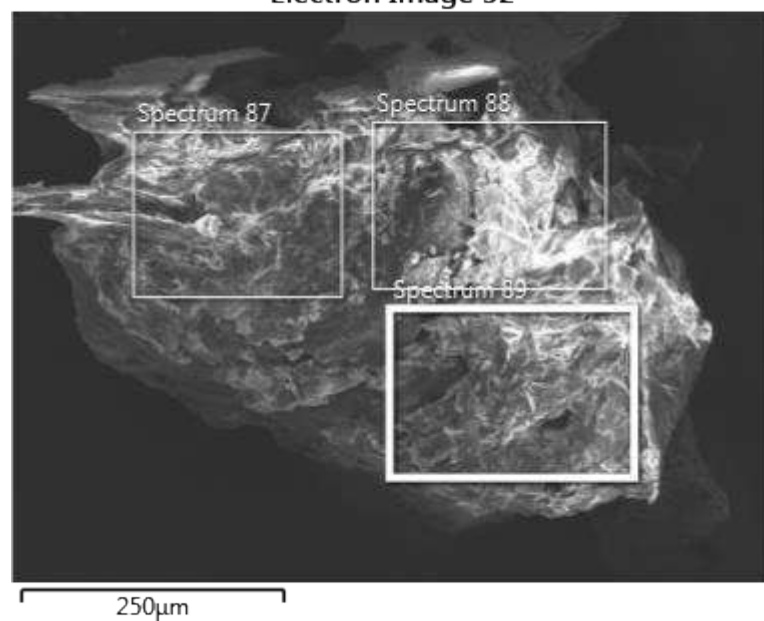

29/11/2019 10:24:42

Project 1

Cemento Mexico T2

CM3 15 Kv

Electron Image 33

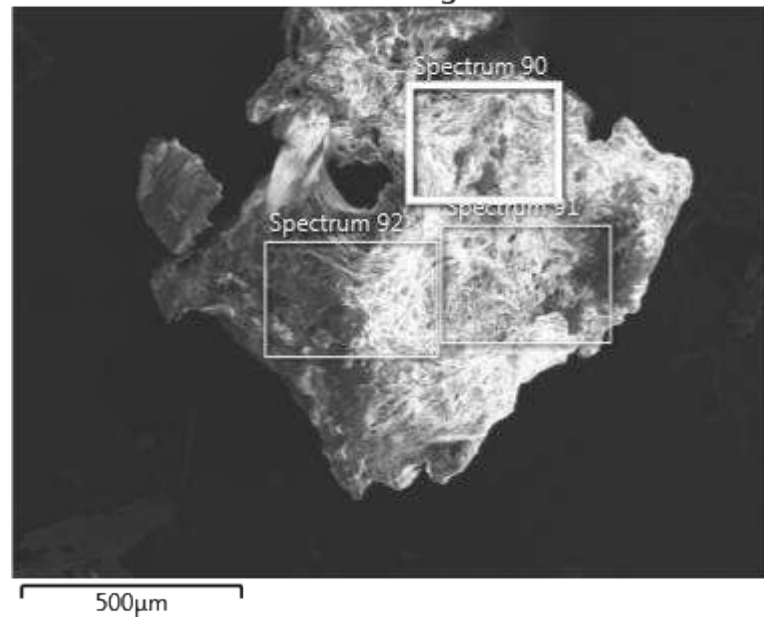

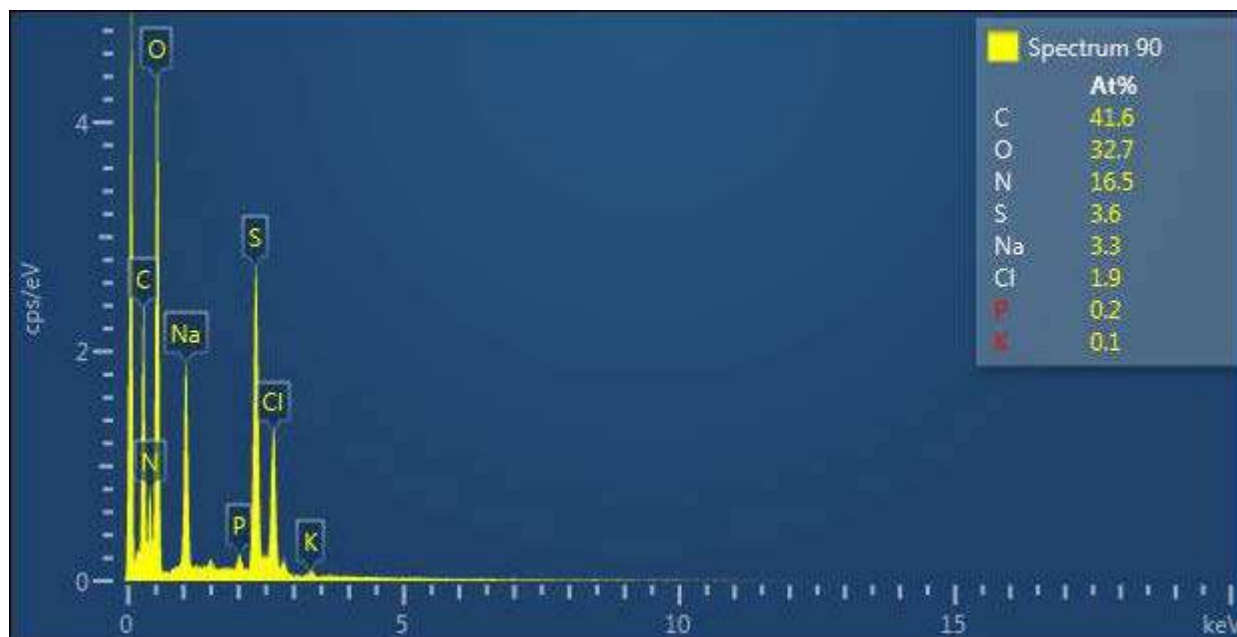

|                                 |                     |
|---------------------------------|---------------------|
| Label:                          | Spectrum 90         |
| Source:                         | Acquired            |
| Created:                        | 29/11/2019 10:24:42 |
| Livetime:                       | 60.3s               |
| Process Time:                   | 4                   |
| Accelerating Voltage:           | 15.00kV             |
| Magnification:                  | 65 x                |
| Working Distance:               | 9.9mm               |
| Specimen Tilt (degrees):        | 0.0                 |
| Elevation (degrees):            | 35.0                |
| Azimuth (degrees):              | 0.0                 |
| Number Of Channels:             | 2048                |
| Energy Range (keV):             | 20 keV              |
| Energy per Channel (eV):        | 10.0eV              |
| Detector Type Id:               | 29                  |
| Detector Type:                  | X-Max               |
| Window Type:                    | SATW                |
| Pulse Pile Up Correction:       | Succeeded           |
| Primary Detector:               | 2617                |
| Primary Detector Serial Number: | 77871-X080          |

| Element | Line Type | Apparent Concentration | k Ratio | Wt%   | Wt% Sigma | Standard Label | Factory Standard | Standard Calibration Date |
|---------|-----------|------------------------|---------|-------|-----------|----------------|------------------|---------------------------|
| C       | K series  | 4.29                   | 0.04293 | 32.76 | 0.74      | C Vit          | Yes              |                           |
| N       | K series  | 7.71                   | 0.01373 | 15.19 | 0.69      | BN             | Yes              |                           |
| O       | K series  | 12.77                  | 0.04298 | 34.36 | 0.52      | SiO2           | Yes              |                           |
| Na      | K         | 3.17                   | 0.01339 | 4.99  | 0.11      | Albite         | Yes              |                           |

|        |          |      |         |        |      |      |     |  |
|--------|----------|------|---------|--------|------|------|-----|--|
|        | series   |      |         |        |      |      |     |  |
| P      | K series | 0.29 | 0.00160 | 0.35   | 0.04 | GaP  | Yes |  |
| S      | K series | 4.22 | 0.03638 | 7.64   | 0.14 | FeS2 | Yes |  |
| Cl     | K series | 2.27 | 0.01984 | 4.46   | 0.11 | NaCl | Yes |  |
| K      | K series | 0.13 | 0.00112 | 0.25   | 0.04 | KBr  | Yes |  |
| Total: |          |      |         | 100.00 |      |      |     |  |

Electron Image 33

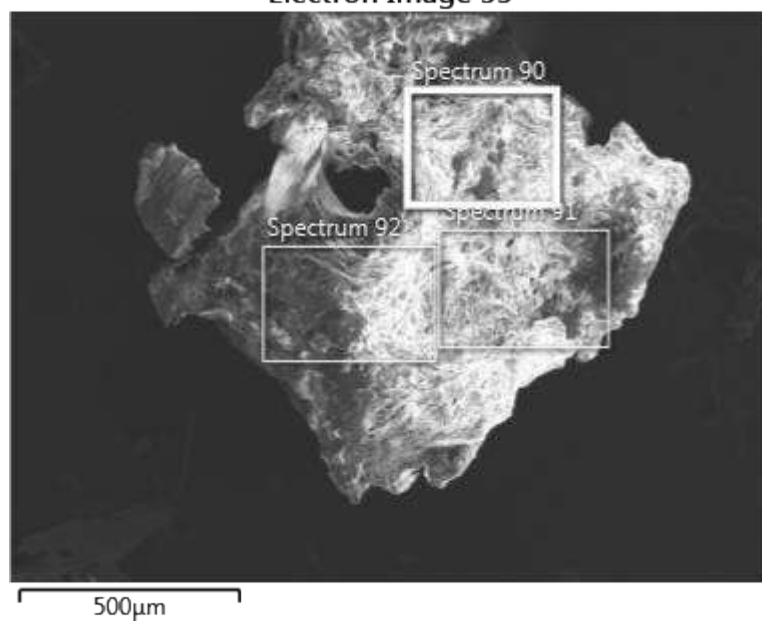

29/11/2019 10:25:51

Project 1

Cemento Mexico T2

CM3 15 Kv

Electron Image 33

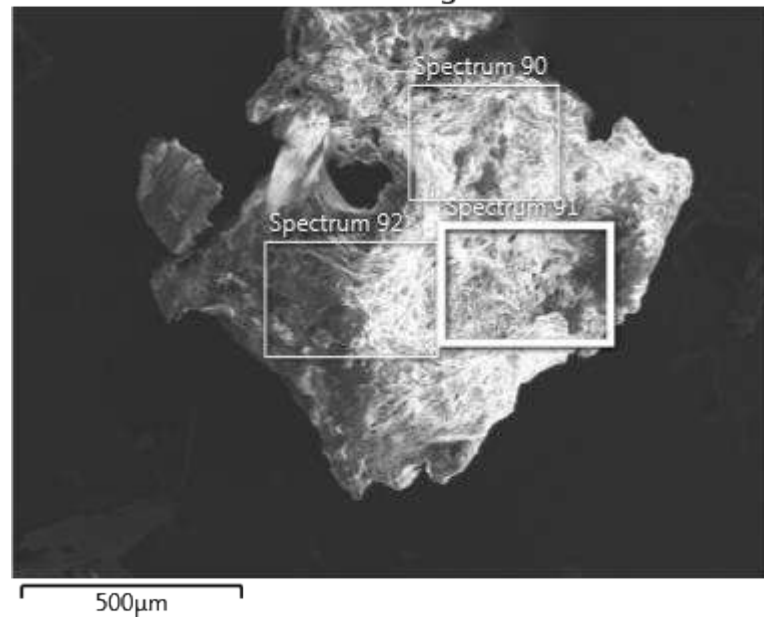

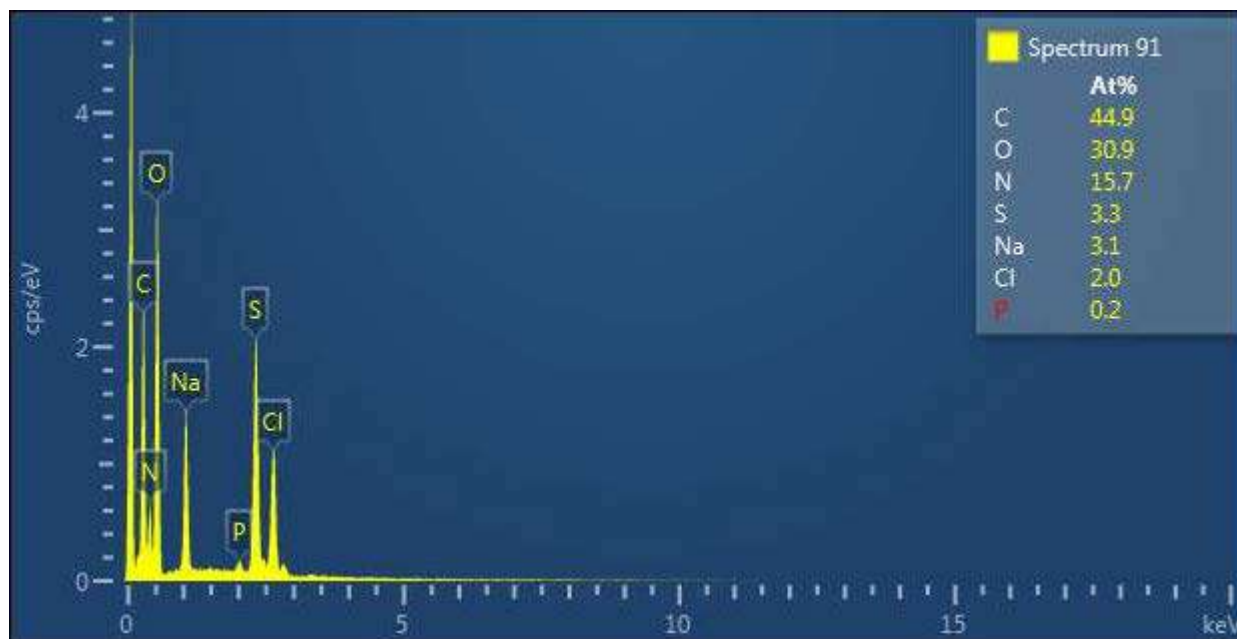

|                                 |                     |
|---------------------------------|---------------------|
| Label:                          | Spectrum 91         |
| Source:                         | Acquired            |
| Created:                        | 29/11/2019 10:25:51 |
| Livetime:                       | 60.4s               |
| Process Time:                   | 4                   |
| Accelerating Voltage:           | 15.00kV             |
| Magnification:                  | 65 x                |
| Working Distance:               | 9.9mm               |
| Specimen Tilt (degrees):        | 0.0                 |
| Elevation (degrees):            | 35.0                |
| Azimuth (degrees):              | 0.0                 |
| Number Of Channels:             | 2048                |
| Energy Range (keV):             | 20 keV              |
| Energy per Channel (eV):        | 10.0eV              |
| Detector Type Id:               | 29                  |
| Detector Type:                  | X-Max               |
| Window Type:                    | SATW                |
| Pulse Pile Up Correction:       | Succeeded           |
| Primary Detector:               | 2617                |
| Primary Detector Serial Number: | 77871-X080          |

| Element | Line Type | Apparent Concentration | k Ratio | Wt%   | Wt% Sigma | Standard Label | Factory Standard | Standard Calibration Date |
|---------|-----------|------------------------|---------|-------|-----------|----------------|------------------|---------------------------|
| C       | K series  | 3.83                   | 0.03829 | 35.83 | 0.66      | C Vit          | Yes              |                           |
| N       | K series  | 5.60                   | 0.00997 | 14.59 | 0.80      | BN             | Yes              |                           |
| O       | K series  | 9.51                   | 0.03200 | 32.80 | 0.52      | SiO2           | Yes              |                           |
| Na      | K         | 2.39                   | 0.01009 | 4.70  | 0.12      | Albite         | Yes              |                           |

|        |          |      |         |        |      |      |     |  |
|--------|----------|------|---------|--------|------|------|-----|--|
|        | series   |      |         |        |      |      |     |  |
| P      | K series | 0.21 | 0.00115 | 0.32   | 0.04 | GaP  | Yes |  |
| S      | K series | 3.06 | 0.02638 | 6.95   | 0.14 | FeS2 | Yes |  |
| Cl     | K series | 1.96 | 0.01712 | 4.82   | 0.12 | NaCl | Yes |  |
| Total: |          |      |         | 100.00 |      |      |     |  |

Electron Image 33

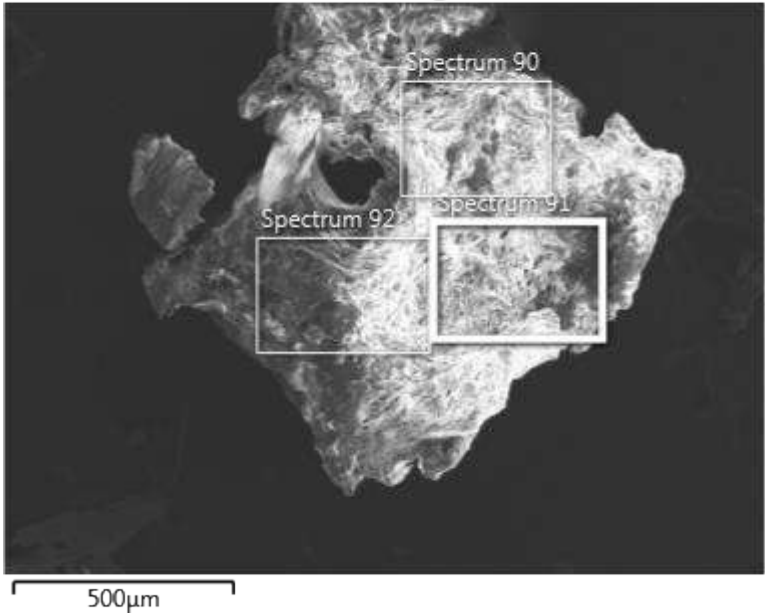



29/11/2019 10:26:59

Project 1

Cemento Mexico T2

CM3 15 Kv

Electron Image 33

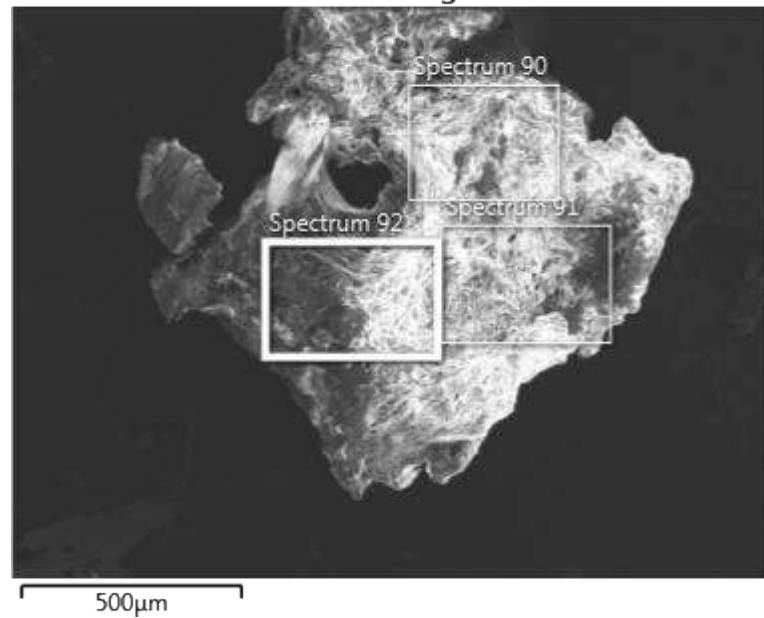

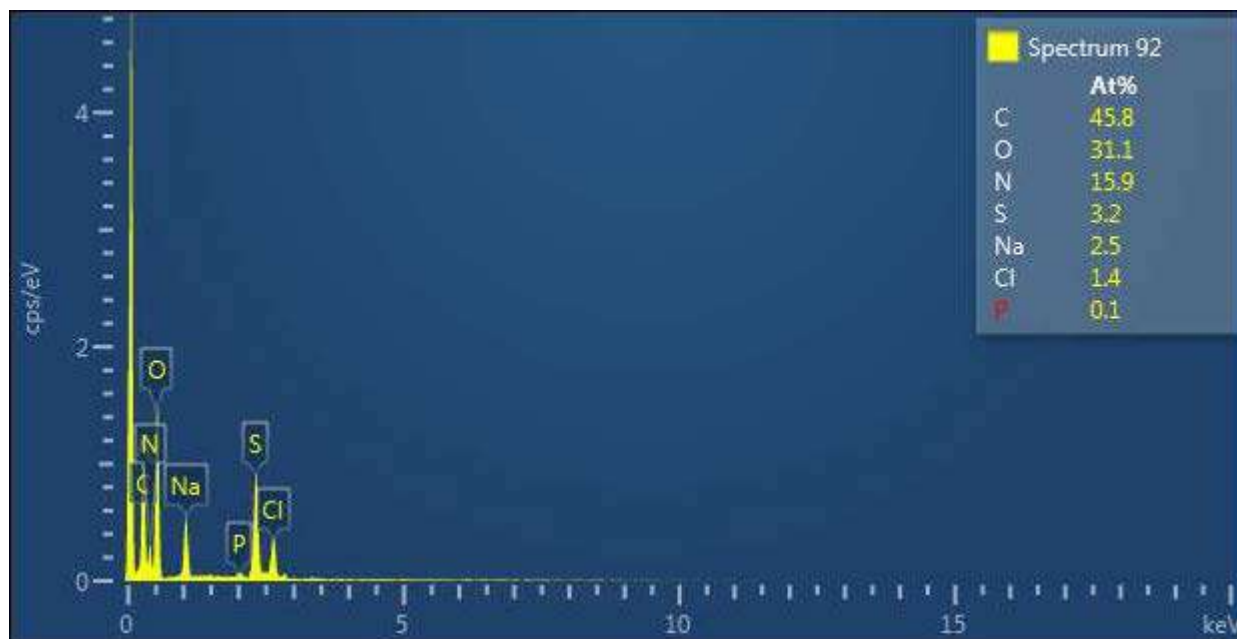

|                                 |                     |
|---------------------------------|---------------------|
| Label:                          | Spectrum 92         |
| Source:                         | Acquired            |
| Created:                        | 29/11/2019 10:26:59 |
| Livetime:                       | 60.0s               |
| Process Time:                   | 4                   |
| Accelerating Voltage:           | 15.00kV             |
| Magnification:                  | 65 x                |
| Working Distance:               | 9.9mm               |
| Specimen Tilt (degrees):        | 0.0                 |
| Elevation (degrees):            | 35.0                |
| Azimuth (degrees):              | 0.0                 |
| Number Of Channels:             | 2048                |
| Energy Range (keV):             | 20 keV              |
| Energy per Channel (eV):        | 10.0eV              |
| Detector Type Id:               | 29                  |
| Detector Type:                  | X-Max               |
| Window Type:                    | SATW                |
| Pulse Pile Up Correction:       | Succeeded           |
| Primary Detector:               | 2617                |
| Primary Detector Serial Number: | 77871-X080          |

| Element | Line Type | Apparent Concentration | k Ratio | Wt%   | Wt% Sigma | Standard Label | Factory Standard | Standard Calibration Date |
|---------|-----------|------------------------|---------|-------|-----------|----------------|------------------|---------------------------|
| C       | K series  | 1.97                   | 0.01966 | 37.02 | 0.98      | C Vit          | Yes              |                           |
| N       | K series  | 2.61                   | 0.00465 | 15.01 | 1.23      | BN             | Yes              |                           |
| O       | K series  | 4.34                   | 0.01461 | 33.48 | 0.80      | SiO2           | Yes              |                           |
| Na      | K         | 0.88                   | 0.00371 | 3.89  | 0.16      | Albite         | Yes              |                           |

|        | series   |      |         |        |      |      |     |  |
|--------|----------|------|---------|--------|------|------|-----|--|
| P      | K series | 0.09 | 0.00049 | 0.30   | 0.06 | GaP  | Yes |  |
| S      | K series | 1.36 | 0.01170 | 6.88   | 0.21 | FeS2 | Yes |  |
| Cl     | K series | 0.62 | 0.00542 | 3.41   | 0.15 | NaCl | Yes |  |
| Total: |          |      |         | 100.00 |      |      |     |  |

Electron Image 33

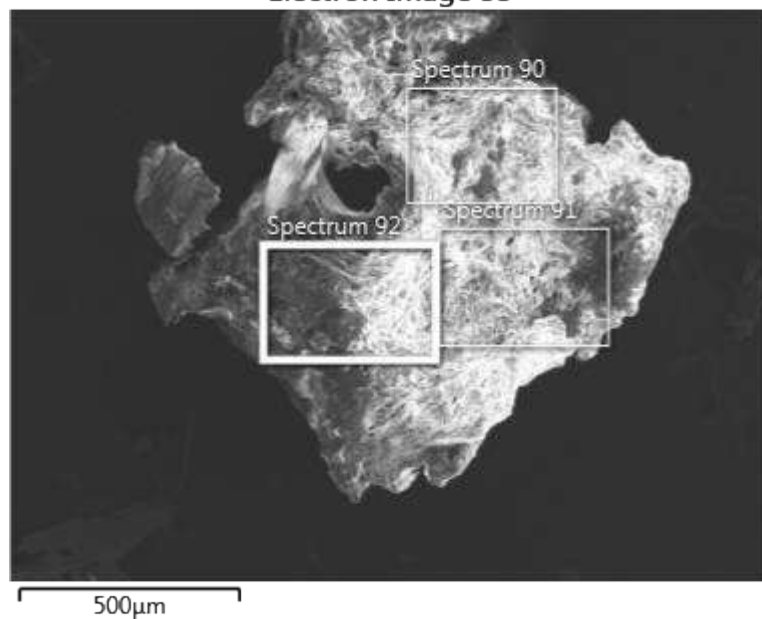

29/11/2019 10:29:46

Project 1

Cemento Mexico T3

CM1 15 Kv

Electron Image 34

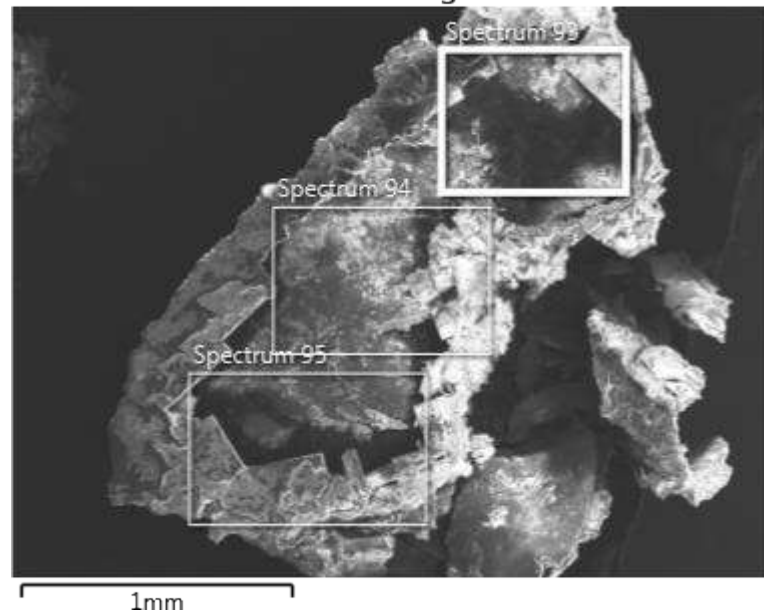

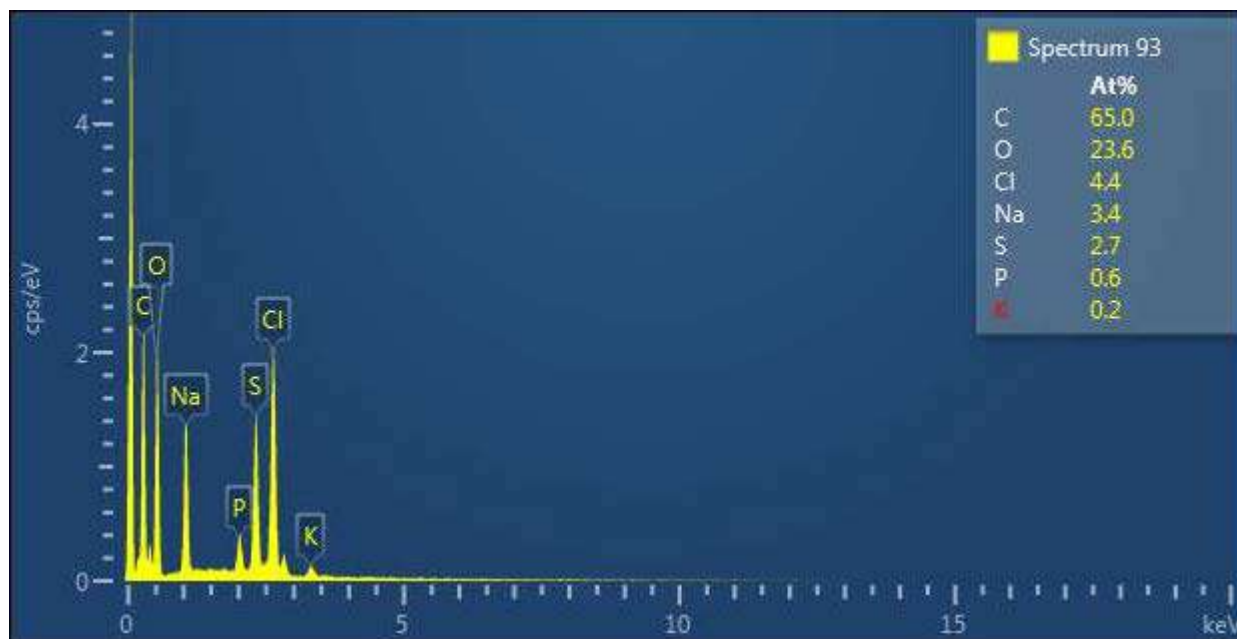

|                                 |                     |
|---------------------------------|---------------------|
| Label:                          | Spectrum 93         |
| Source:                         | Acquired            |
| Created:                        | 29/11/2019 10:29:46 |
| Livetime:                       | 60.6s               |
| Process Time:                   | 4                   |
| Accelerating Voltage:           | 15.00kV             |
| Magnification:                  | 40 x                |
| Working Distance:               | 9.9mm               |
| Specimen Tilt (degrees):        | 0.0                 |
| Elevation (degrees):            | 35.0                |
| Azimuth (degrees):              | 0.0                 |
| Number Of Channels:             | 2048                |
| Energy Range (keV):             | 20 keV              |
| Energy per Channel (eV):        | 10.0eV              |
| Detector Type Id:               | 29                  |
| Detector Type:                  | X-Max               |
| Window Type:                    | SATW                |
| Pulse Pile Up Correction:       | Succeeded           |
| Primary Detector:               | 2617                |
| Primary Detector Serial Number: | 77871-X080          |

| Element | Line Type | Apparent Concentration | k Ratio | Wt%   | Wt% Sigma | Standard Label | Factory Standard | Standard Calibration Date |
|---------|-----------|------------------------|---------|-------|-----------|----------------|------------------|---------------------------|
| C       | K series  | 3.54                   | 0.03544 | 51.70 | 0.86      | C Vit          | Yes              |                           |
| O       | K series  | 5.81                   | 0.01956 | 25.05 | 0.55      | SiO2           | Yes              |                           |
| Na      | K series  | 2.35                   | 0.00992 | 5.25  | 0.15      | Albite         | Yes              |                           |
| P       | K         | 0.68                   | 0.00380 | 1.27  | 0.07      | GaP            | Yes              |                           |

|        |          |      |         |        |      |      |     |  |
|--------|----------|------|---------|--------|------|------|-----|--|
|        | series   |      |         |        |      |      |     |  |
| S      | K series | 2.09 | 0.01800 | 5.73   | 0.15 | FeS2 | Yes |  |
| Cl     | K series | 3.48 | 0.03043 | 10.36  | 0.23 | NaCl | Yes |  |
| K      | K series | 0.22 | 0.00189 | 0.65   | 0.07 | KBr  | Yes |  |
| Total: |          |      |         | 100.00 |      |      |     |  |

Electron Image 34

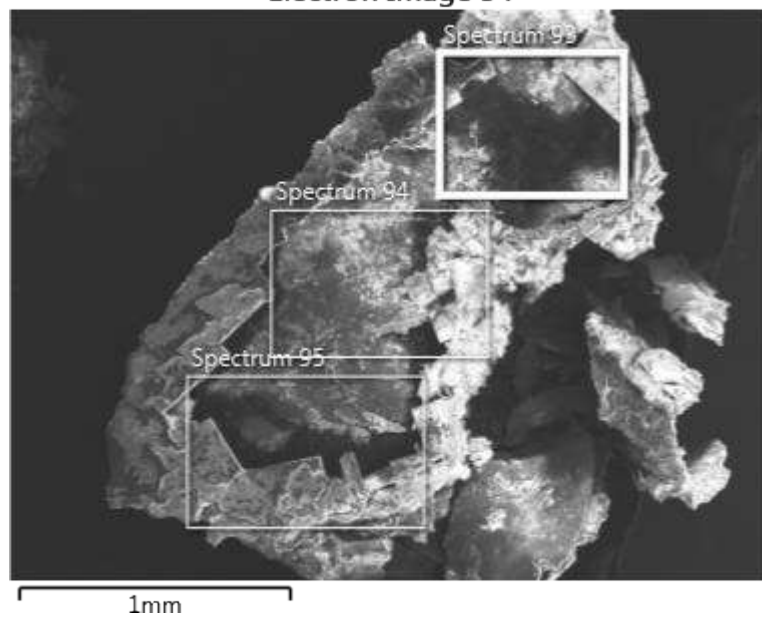

29/11/2019 10:30:54

Project 1

Cemento Mexico T3

CM1 15 Kv

Electron Image 34

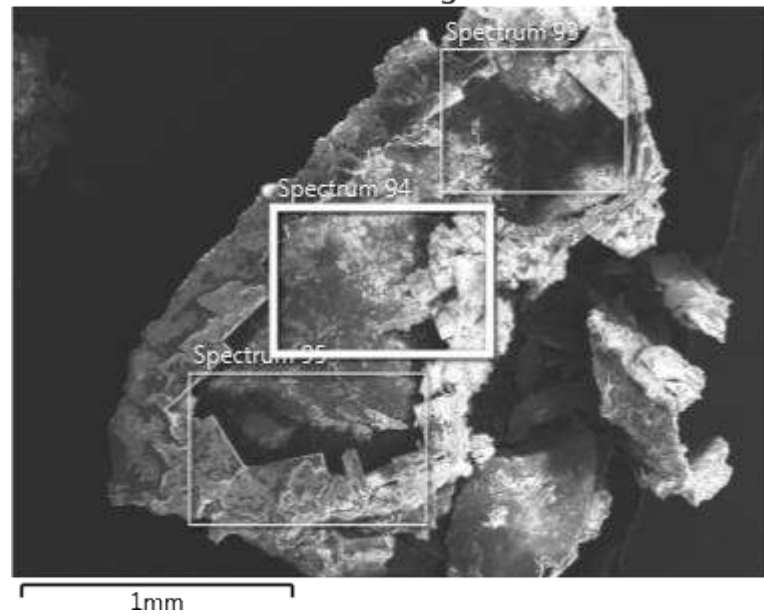

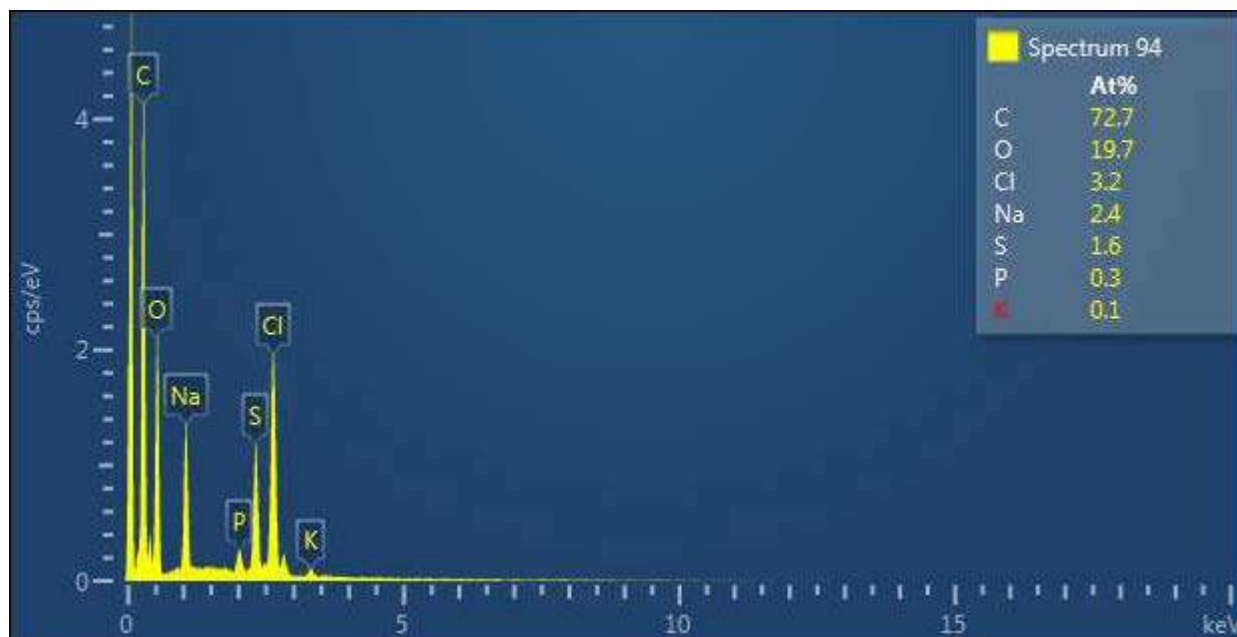

|                                 |                     |
|---------------------------------|---------------------|
| Label:                          | Spectrum 94         |
| Source:                         | Acquired            |
| Created:                        | 29/11/2019 10:30:54 |
| Livetime:                       | 60.2s               |
| Process Time:                   | 4                   |
| Accelerating Voltage:           | 15.00kV             |
| Magnification:                  | 40 x                |
| Working Distance:               | 9.9mm               |
| Specimen Tilt (degrees):        | 0.0                 |
| Elevation (degrees):            | 35.0                |
| Azimuth (degrees):              | 0.0                 |
| Number Of Channels:             | 2048                |
| Energy Range (keV):             | 20 keV              |
| Energy per Channel (eV):        | 10.0eV              |
| Detector Type Id:               | 29                  |
| Detector Type:                  | X-Max               |
| Window Type:                    | SATW                |
| Pulse Pile Up Correction:       | Succeeded           |
| Primary Detector:               | 2617                |
| Primary Detector Serial Number: | 77871-X080          |

| Element | Line Type | Apparent Concentration | k Ratio | Wt%   | Wt% Sigma | Standard Label | Factory Standard | Standard Calibration Date |
|---------|-----------|------------------------|---------|-------|-----------|----------------|------------------|---------------------------|
| C       | K series  | 7.20                   | 0.07203 | 61.35 | 0.58      | C Vit          | Yes              |                           |
| O       | K series  | 6.16                   | 0.02072 | 22.13 | 0.43      | SiO2           | Yes              |                           |
| Na      | K series  | 2.26                   | 0.00953 | 3.94  | 0.10      | Albite         | Yes              |                           |
| P       | K         | 0.43                   | 0.00238 | 0.63  | 0.05      | GaP            | Yes              |                           |



|        |          |      |         |        |      |      |     |  |
|--------|----------|------|---------|--------|------|------|-----|--|
|        | series   |      |         |        |      |      |     |  |
| S      | K series | 1.72 | 0.01478 | 3.69   | 0.10 | FeS2 | Yes |  |
| Cl     | K series | 3.41 | 0.02979 | 7.88   | 0.16 | NaCl | Yes |  |
| K      | K series | 0.17 | 0.00141 | 0.38   | 0.05 | KBr  | Yes |  |
| Total: |          |      |         | 100.00 |      |      |     |  |

Electron Image 34

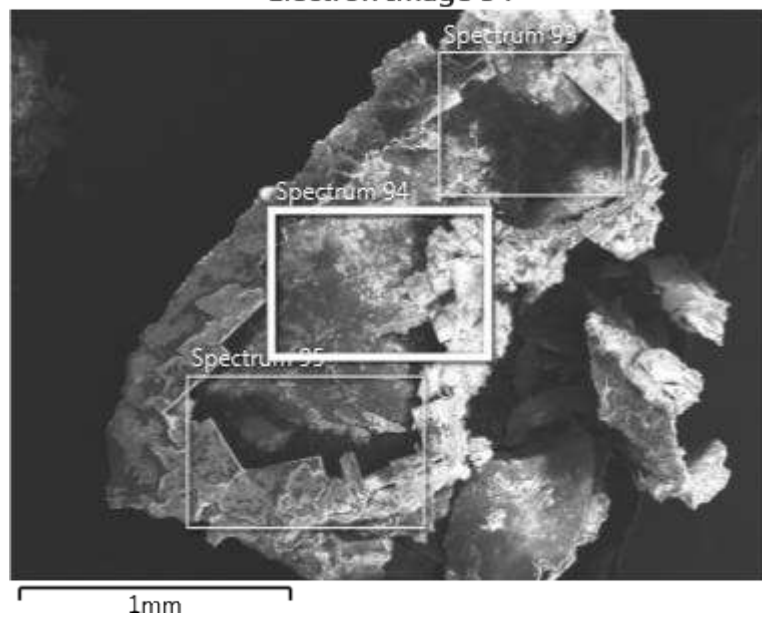

29/11/2019 10:32:02

Project 1

Cemento Mexico T3

CM1 15 Kv

Electron Image 34

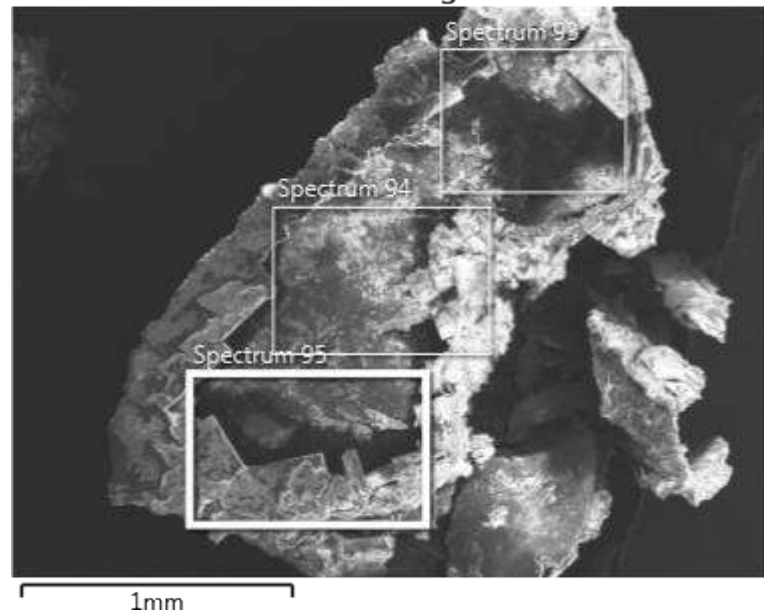

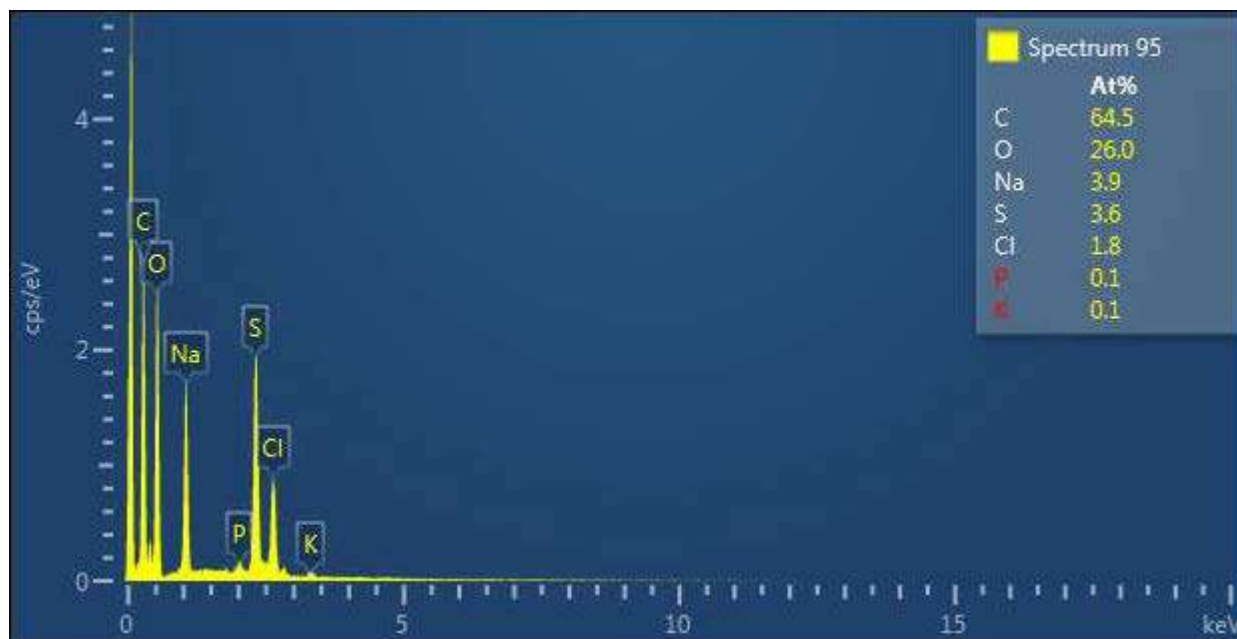

|                                 |                     |
|---------------------------------|---------------------|
| Label:                          | Spectrum 95         |
| Source:                         | Acquired            |
| Created:                        | 29/11/2019 10:32:02 |
| Livetime:                       | 60.4s               |
| Process Time:                   | 4                   |
| Accelerating Voltage:           | 15.00kV             |
| Magnification:                  | 40 x                |
| Working Distance:               | 9.9mm               |
| Specimen Tilt (degrees):        | 0.0                 |
| Elevation (degrees):            | 35.0                |
| Azimuth (degrees):              | 0.0                 |
| Number Of Channels:             | 2048                |
| Energy Range (keV):             | 20 keV              |
| Energy per Channel (eV):        | 10.0eV              |
| Detector Type Id:               | 29                  |
| Detector Type:                  | X-Max               |
| Window Type:                    | SATW                |
| Pulse Pile Up Correction:       | Succeeded           |
| Primary Detector:               | 2617                |
| Primary Detector Serial Number: | 77871-X080          |

| Element | Line Type | Apparent Concentration | k Ratio | Wt%   | Wt% Sigma | Standard Label | Factory Standard | Standard Calibration Date |
|---------|-----------|------------------------|---------|-------|-----------|----------------|------------------|---------------------------|
| C       | K series  | 4.88                   | 0.04877 | 52.75 | 0.72      | C Vit          | Yes              |                           |
| O       | K series  | 7.40                   | 0.02492 | 28.31 | 0.52      | SiO2           | Yes              |                           |
| Na      | K series  | 2.87                   | 0.01211 | 6.13  | 0.15      | Albite         | Yes              |                           |
| P       | K         | 0.17                   | 0.00097 | 0.31  | 0.05      | GaP            | Yes              |                           |

|        |          |      |         |        |      |      |     |  |
|--------|----------|------|---------|--------|------|------|-----|--|
|        | series   |      |         |        |      |      |     |  |
| S      | K series | 3.01 | 0.02595 | 7.87   | 0.17 | FeS2 | Yes |  |
| Cl     | K series | 1.52 | 0.01329 | 4.34   | 0.12 | NaCl | Yes |  |
| K      | K series | 0.11 | 0.00093 | 0.30   | 0.05 | KBr  | Yes |  |
| Total: |          |      |         | 100.00 |      |      |     |  |

Electron Image 34

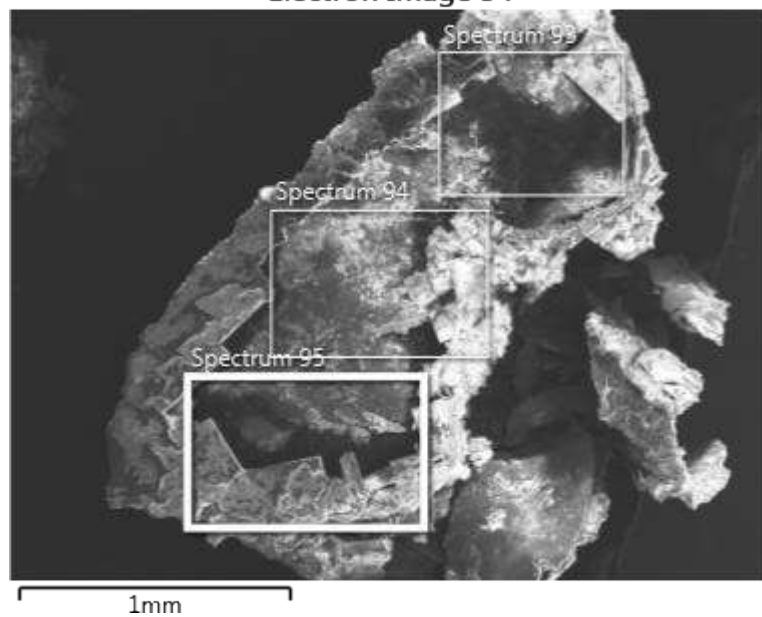

29/11/2019 10:38:02

Project 1

Cemento Mexico T3

CM2 15 Kv

Electron Image 35

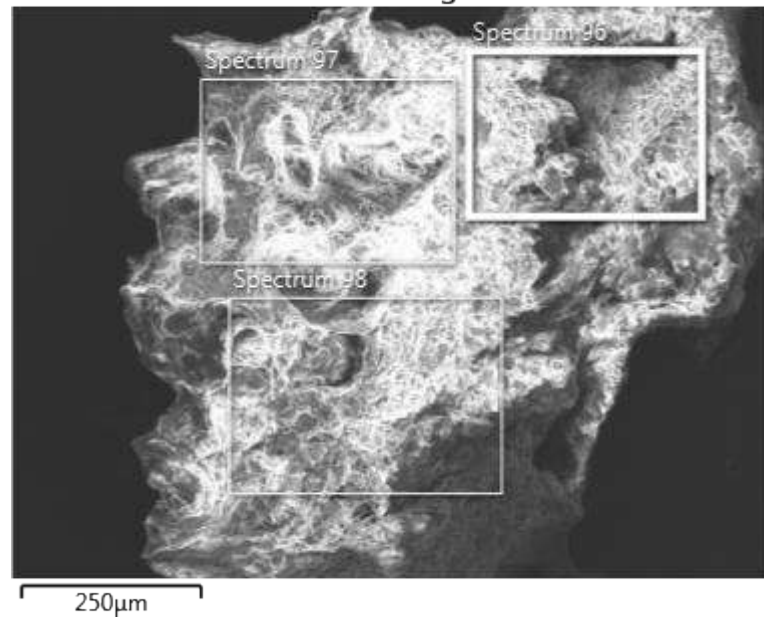

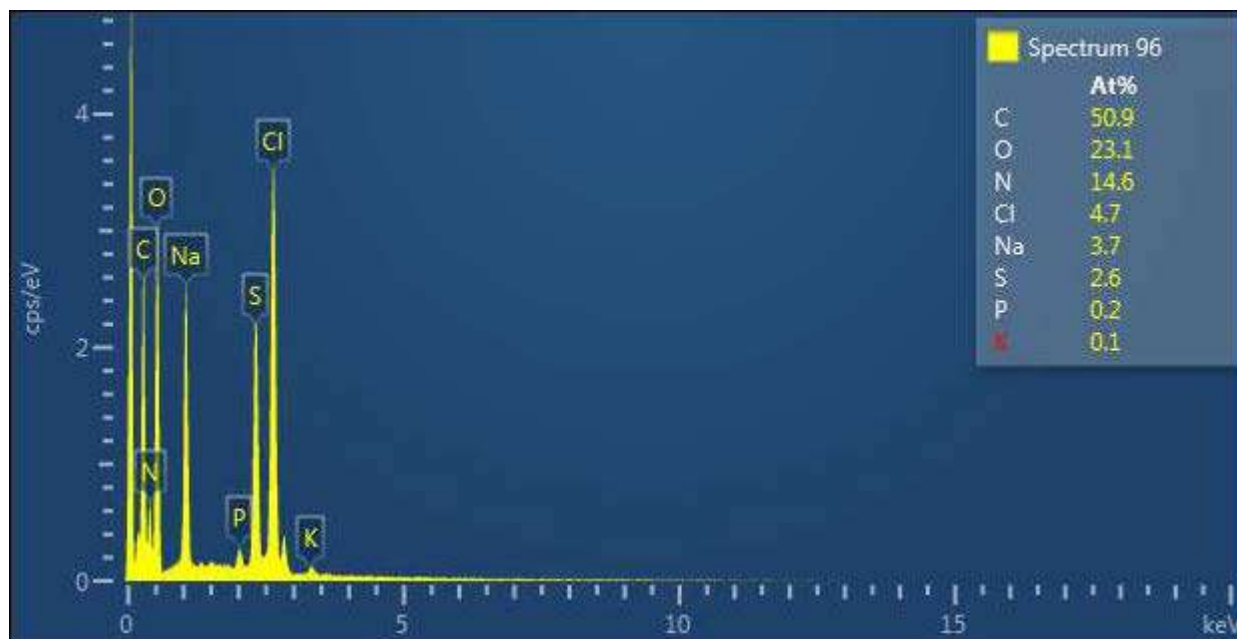

|                                 |                     |
|---------------------------------|---------------------|
| Label:                          | Spectrum 96         |
| Source:                         | Acquired            |
| Created:                        | 29/11/2019 10:38:02 |
| Livetime:                       | 60.0s               |
| Process Time:                   | 4                   |
| Accelerating Voltage:           | 15.00kV             |
| Magnification:                  | 106 x               |
| Working Distance:               | 9.9mm               |
| Specimen Tilt (degrees):        | 0.0                 |
| Elevation (degrees):            | 35.0                |
| Azimuth (degrees):              | 0.0                 |
| Number Of Channels:             | 2048                |
| Energy Range (keV):             | 20 keV              |
| Energy per Channel (eV):        | 10.0eV              |
| Detector Type Id:               | 29                  |
| Detector Type:                  | X-Max               |
| Window Type:                    | SATW                |
| Pulse Pile Up Correction:       | Succeeded           |
| Primary Detector:               | 2617                |
| Primary Detector Serial Number: | 77871-X080          |

| Element | Line Type | Apparent Concentration | k Ratio | Wt%   | Wt% Sigma | Standard Label | Factory Standard | Standard Calibration Date |
|---------|-----------|------------------------|---------|-------|-----------|----------------|------------------|---------------------------|
| C       | K series  | 4.71                   | 0.04706 | 39.93 | 0.80      | C Vit          | Yes              |                           |
| N       | K series  | 6.01                   | 0.01070 | 13.38 | 0.74      | BN             | Yes              |                           |
| O       | K series  | 8.83                   | 0.02970 | 24.14 | 0.45      | SiO2           | Yes              |                           |
| Na      | K         | 4.16                   | 0.01754 | 5.53  | 0.12      | Albite         | Yes              |                           |

|        |          |      |         |        |      |      |     |  |
|--------|----------|------|---------|--------|------|------|-----|--|
|        | series   |      |         |        |      |      |     |  |
| P      | K series | 0.37 | 0.00206 | 0.40   | 0.04 | GaP  | Yes |  |
| S      | K series | 3.45 | 0.02974 | 5.48   | 0.12 | FeS2 | Yes |  |
| Cl     | K series | 6.30 | 0.05507 | 10.86  | 0.20 | NaCl | Yes |  |
| K      | K series | 0.17 | 0.00140 | 0.28   | 0.04 | KBr  | Yes |  |
| Total: |          |      |         | 100.00 |      |      |     |  |

Electron Image 35

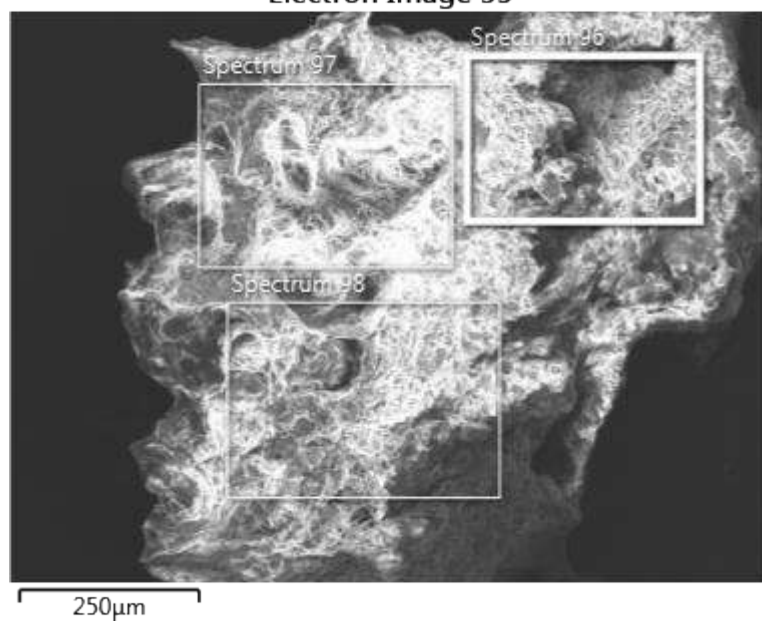

29/11/2019 10:39:09

Project 1

Cemento Mexico T3

CM2 15 Kv

Electron Image 35

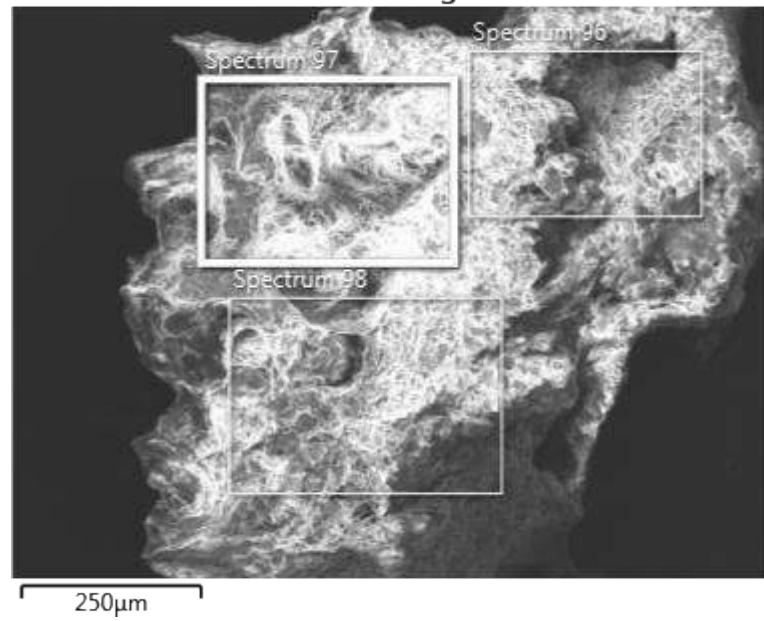



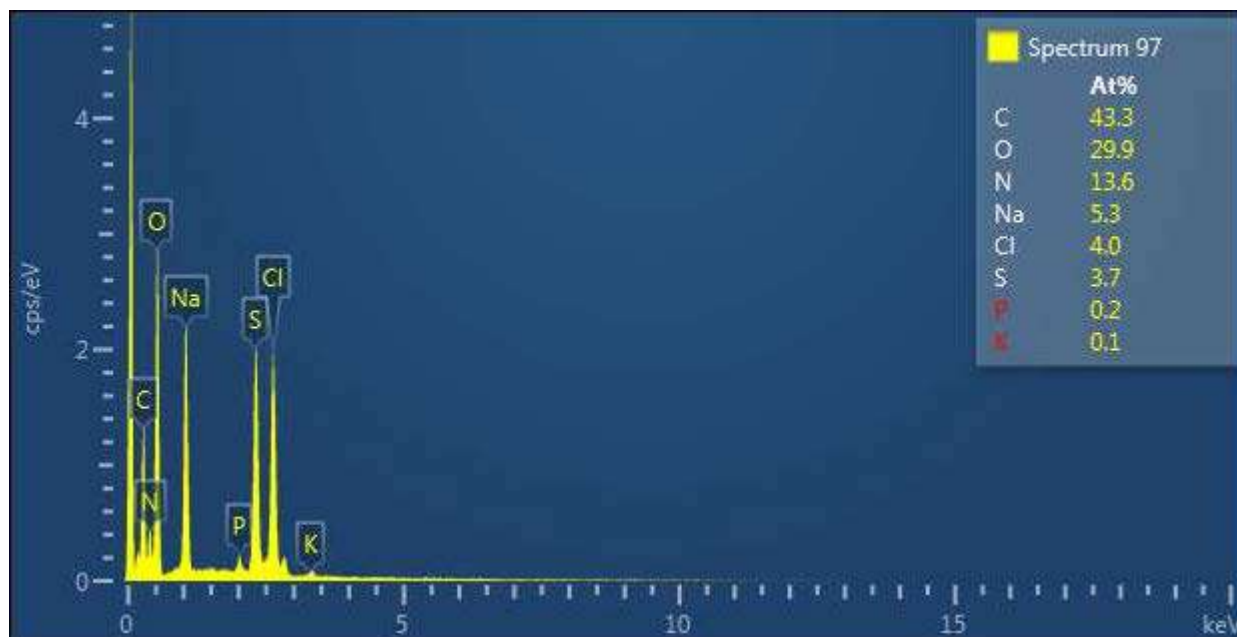

|                                 |                     |
|---------------------------------|---------------------|
| Label:                          | Spectrum 97         |
| Source:                         | Acquired            |
| Created:                        | 29/11/2019 10:39:09 |
| Livetime:                       | 60.3s               |
| Process Time:                   | 4                   |
| Accelerating Voltage:           | 15.00kV             |
| Magnification:                  | 106 x               |
| Working Distance:               | 9.9mm               |
| Specimen Tilt (degrees):        | 0.0                 |
| Elevation (degrees):            | 35.0                |
| Azimuth (degrees):              | 0.0                 |
| Number Of Channels:             | 2048                |
| Energy Range (keV):             | 20 keV              |
| Energy per Channel (eV):        | 10.0eV              |
| Detector Type Id:               | 29                  |
| Detector Type:                  | X-Max               |
| Window Type:                    | SATW                |
| Pulse Pile Up Correction:       | Succeeded           |
| Primary Detector:               | 2617                |
| Primary Detector Serial Number: | 77871-X080          |

| Element | Line Type | Apparent Concentration | k Ratio | Wt%   | Wt% Sigma | Standard Label | Factory Standard | Standard Calibration Date |
|---------|-----------|------------------------|---------|-------|-----------|----------------|------------------|---------------------------|
| C       | K series  | 2.46                   | 0.02462 | 32.93 | 0.98      | C Vit          | Yes              |                           |
| N       | K series  | 4.03                   | 0.00718 | 12.02 | 0.83      | BN             | Yes              |                           |
| O       | K series  | 8.20                   | 0.02760 | 30.23 | 0.60      | SiO2           | Yes              |                           |
| Na      | K         | 3.75                   | 0.01582 | 7.71  | 0.18      | Albite         | Yes              |                           |

|        |          |      |         |        |      |      |     |  |
|--------|----------|------|---------|--------|------|------|-----|--|
|        | series   |      |         |        |      |      |     |  |
| P      | K series | 0.27 | 0.00150 | 0.45   | 0.05 | GaP  | Yes |  |
| S      | K series | 3.04 | 0.02621 | 7.43   | 0.17 | FeS2 | Yes |  |
| Cl     | K series | 3.36 | 0.02934 | 8.93   | 0.20 | NaCl | Yes |  |
| K      | K series | 0.11 | 0.00096 | 0.29   | 0.05 | KBr  | Yes |  |
| Total: |          |      |         | 100.00 |      |      |     |  |

Electron Image 35

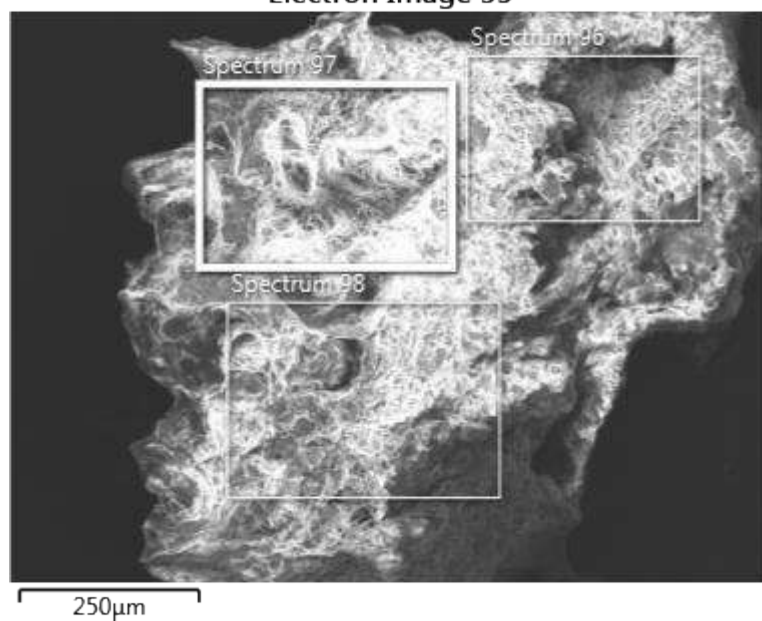

29/11/2019 10:40:16

Project 1

Cemento Mexico T3

CM2 15 Kv

Electron Image 35

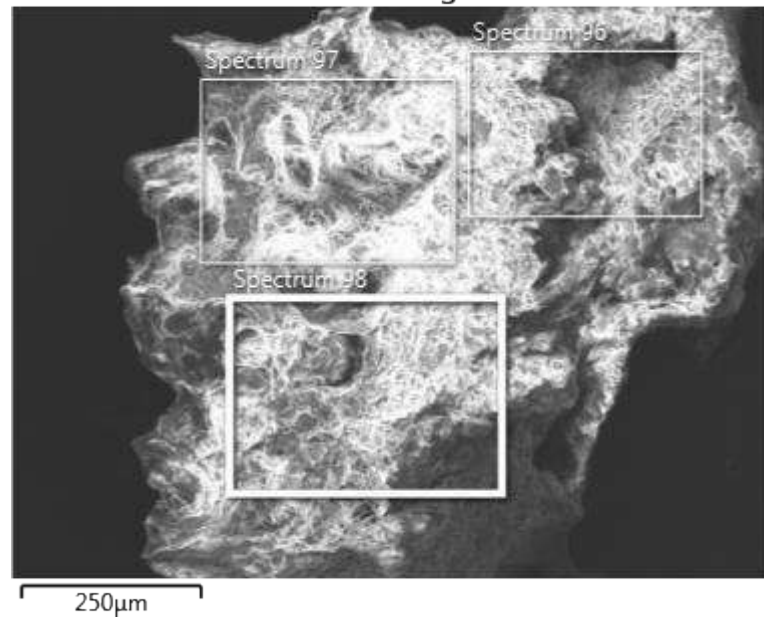

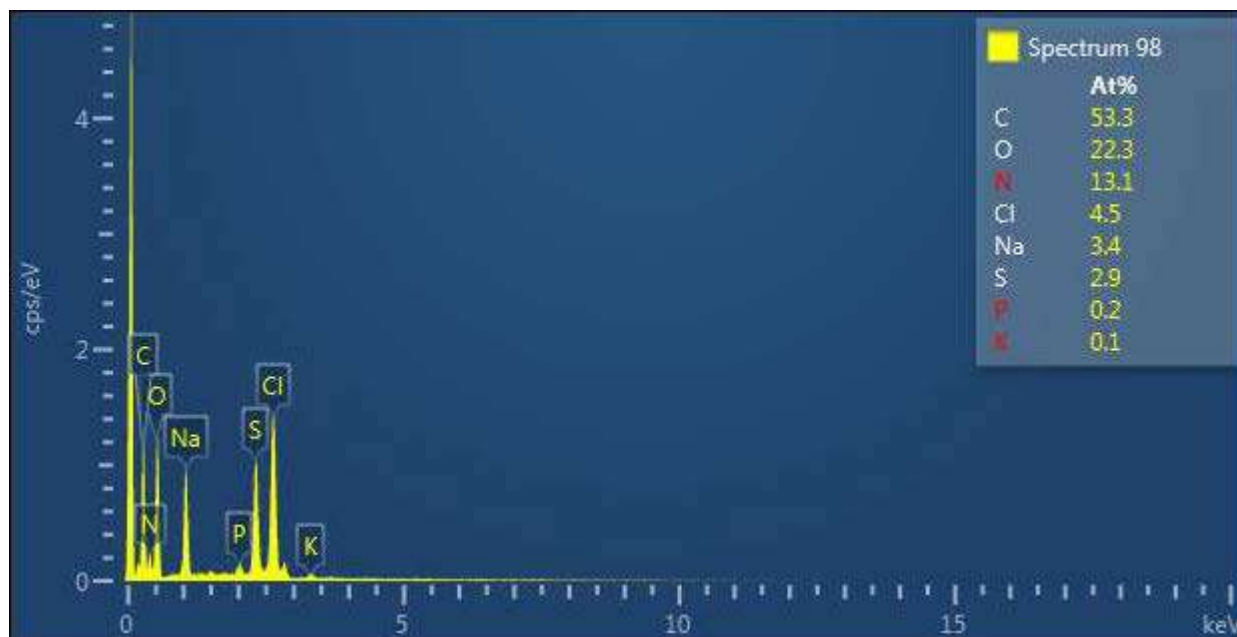

|                                 |                     |
|---------------------------------|---------------------|
| Label:                          | Spectrum 98         |
| Source:                         | Acquired            |
| Created:                        | 29/11/2019 10:40:16 |
| Livetime:                       | 60.4s               |
| Process Time:                   | 4                   |
| Accelerating Voltage:           | 15.00kV             |
| Magnification:                  | 106 x               |
| Working Distance:               | 9.9mm               |
| Specimen Tilt (degrees):        | 0.0                 |
| Elevation (degrees):            | 35.0                |
| Azimuth (degrees):              | 0.0                 |
| Number Of Channels:             | 2048                |
| Energy Range (keV):             | 20 keV              |
| Energy per Channel (eV):        | 10.0eV              |
| Detector Type Id:               | 29                  |
| Detector Type:                  | X-Max               |
| Window Type:                    | SATW                |
| Pulse Pile Up Correction:       | Succeeded           |
| Primary Detector:               | 2617                |
| Primary Detector Serial Number: | 77871-X080          |

| Element | Line Type | Apparent Concentration | k Ratio | Wt%   | Wt% Sigma | Standard Label | Factory Standard | Standard Calibration Date |
|---------|-----------|------------------------|---------|-------|-----------|----------------|------------------|---------------------------|
| C       | K series  | 2.05                   | 0.02050 | 41.98 | 1.23      | C Vit          | Yes              |                           |
| N       | K series  | 2.15                   | 0.00383 | 12.03 | 1.15      | BN             | Yes              |                           |
| O       | K series  | 3.54                   | 0.01190 | 23.40 | 0.69      | SiO2           | Yes              |                           |
| Na      | K         | 1.61                   | 0.00681 | 5.14  | 0.18      | Albite         | Yes              |                           |

|        |          |      |         |        |      |      |     |  |
|--------|----------|------|---------|--------|------|------|-----|--|
|        | series   |      |         |        |      |      |     |  |
| P      | K series | 0.19 | 0.00107 | 0.50   | 0.07 | GaP  | Yes |  |
| S      | K series | 1.58 | 0.01362 | 6.04   | 0.19 | FeS2 | Yes |  |
| Cl     | K series | 2.54 | 0.02217 | 10.54  | 0.30 | NaCl | Yes |  |
| K      | K series | 0.09 | 0.00078 | 0.37   | 0.07 | KBr  | Yes |  |
| Total: |          |      |         | 100.00 |      |      |     |  |

Electron Image 35

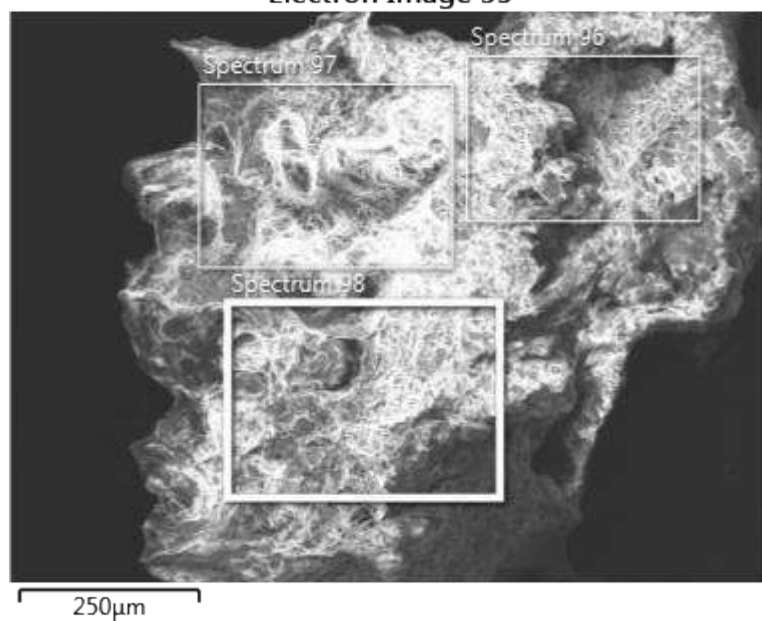

29/11/2019 10:44:46

Project 1

Cemento Mexico T3

CM3 15 Kv

Electron Image 36

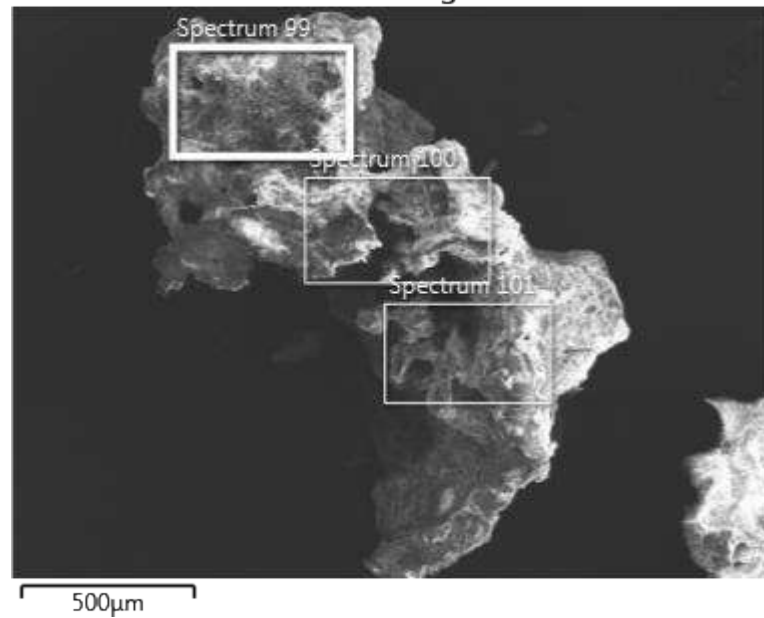

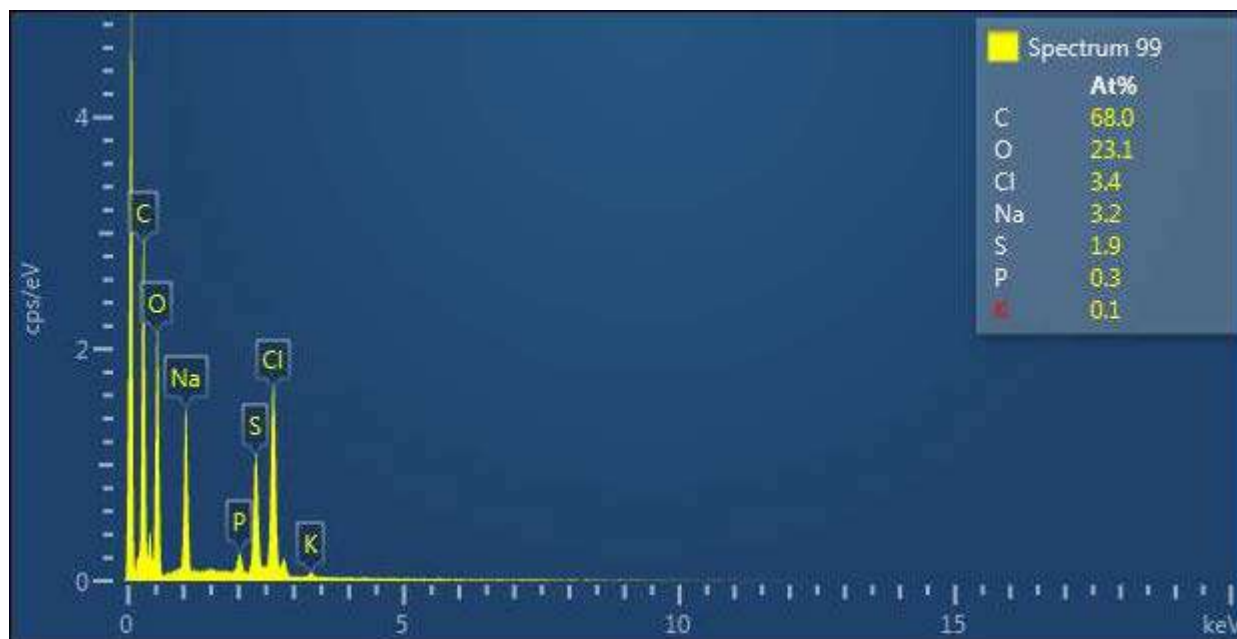

|                                 |                     |
|---------------------------------|---------------------|
| Label:                          | Spectrum 99         |
| Source:                         | Acquired            |
| Created:                        | 29/11/2019 10:44:46 |
| Livetime:                       | 60.3s               |
| Process Time:                   | 4                   |
| Accelerating Voltage:           | 15.00kV             |
| Magnification:                  | 51 x                |
| Working Distance:               | 9.9mm               |
| Specimen Tilt (degrees):        | 0.0                 |
| Elevation (degrees):            | 35.0                |
| Azimuth (degrees):              | 0.0                 |
| Number Of Channels:             | 2048                |
| Energy Range (keV):             | 20 keV              |
| Energy per Channel (eV):        | 10.0eV              |
| Detector Type Id:               | 29                  |
| Detector Type:                  | X-Max               |
| Window Type:                    | SATW                |
| Pulse Pile Up Correction:       | Succeeded           |
| Primary Detector:               | 2617                |
| Primary Detector Serial Number: | 77871-X080          |

| Element | Line Type | Apparent Concentration | k Ratio | Wt%   | Wt% Sigma | Standard Label | Factory Standard | Standard Calibration Date |
|---------|-----------|------------------------|---------|-------|-----------|----------------|------------------|---------------------------|
| C       | K series  | 5.12                   | 0.05118 | 56.19 | 0.71      | C Vit          | Yes              |                           |
| O       | K series  | 6.30                   | 0.02121 | 25.39 | 0.51      | SiO2           | Yes              |                           |
| Na      | K series  | 2.44                   | 0.01029 | 5.12  | 0.13      | Albite         | Yes              |                           |
| P       | K         | 0.37                   | 0.00207 | 0.65  | 0.05      | GaP            | Yes              |                           |

|        |          |      |         |        |      |      |     |  |
|--------|----------|------|---------|--------|------|------|-----|--|
|        | series   |      |         |        |      |      |     |  |
| S      | K series | 1.62 | 0.01395 | 4.16   | 0.12 | FeS2 | Yes |  |
| Cl     | K series | 2.98 | 0.02602 | 8.23   | 0.18 | NaCl | Yes |  |
| K      | K series | 0.09 | 0.00077 | 0.25   | 0.05 | KBr  | Yes |  |
| Total: |          |      |         | 100.00 |      |      |     |  |

Electron Image 36

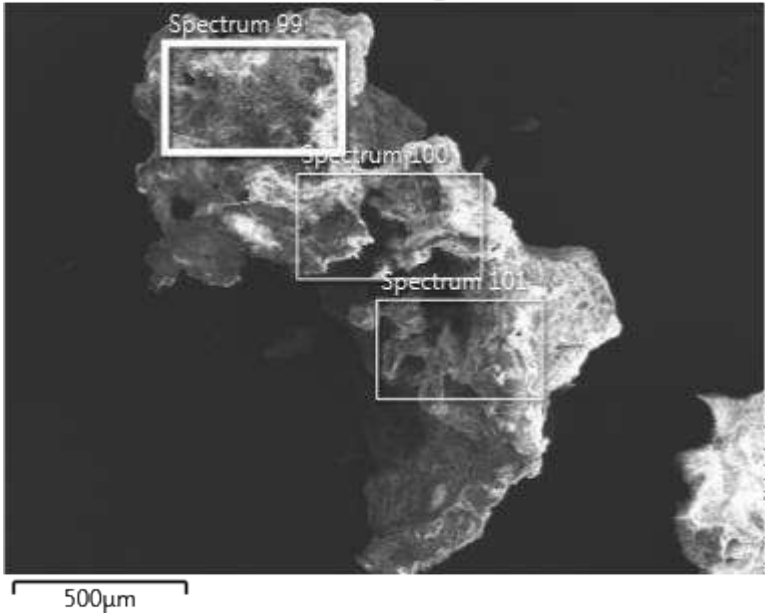



29/11/2019 10:45:54

Project 1

Cemento Mexico T3

CM3 15 Kv

Electron Image 36

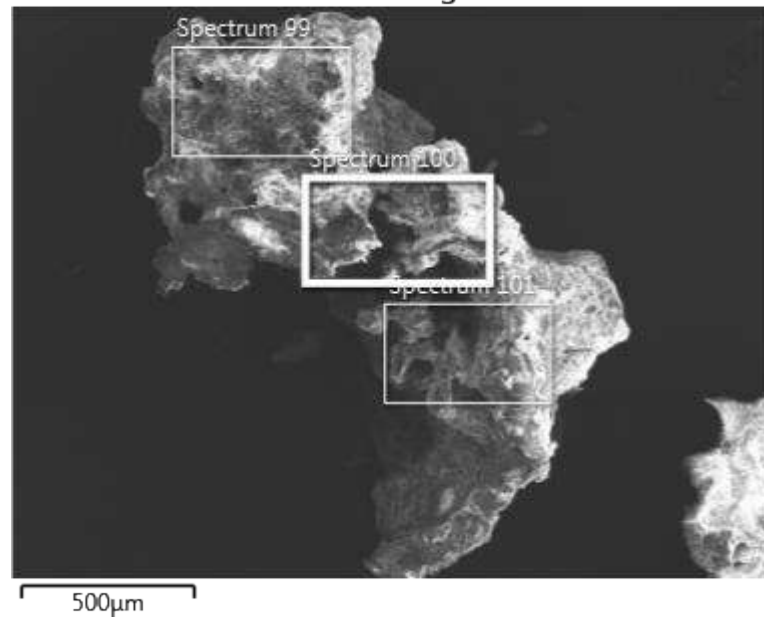

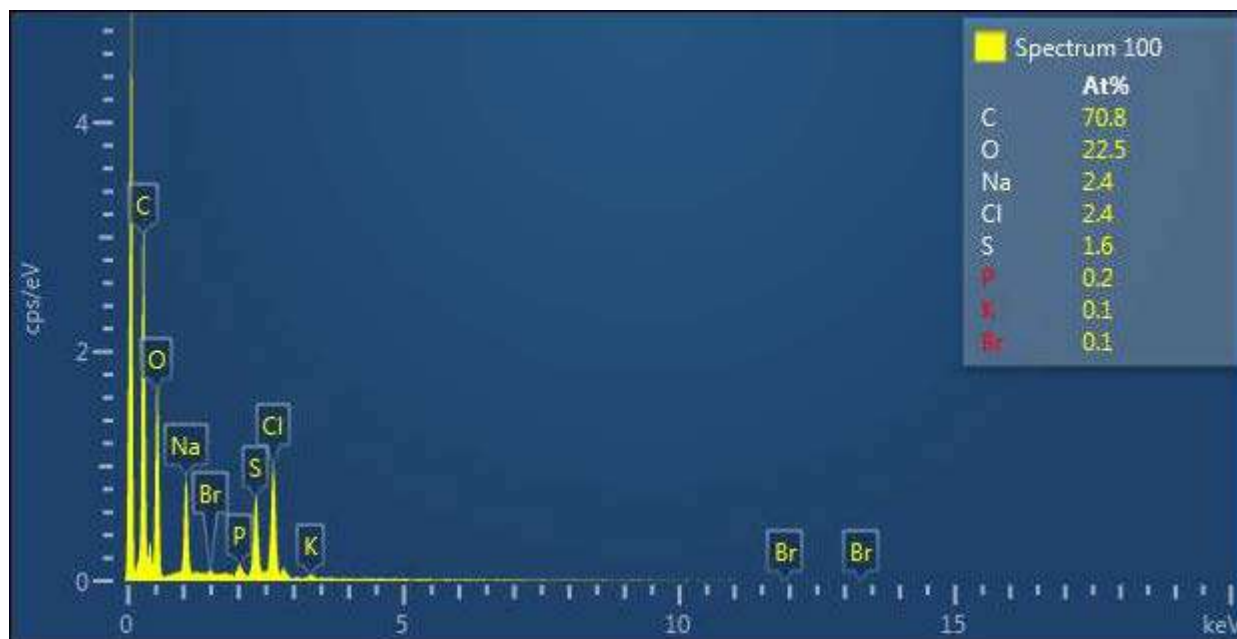

|                                 |                     |
|---------------------------------|---------------------|
| Label:                          | Spectrum 100        |
| Source:                         | Acquired            |
| Created:                        | 29/11/2019 10:45:54 |
| Livetime:                       | 60.0s               |
| Process Time:                   | 4                   |
| Accelerating Voltage:           | 15.00kV             |
| Magnification:                  | 51 x                |
| Working Distance:               | 9.9mm               |
| Specimen Tilt (degrees):        | 0.0                 |
| Elevation (degrees):            | 35.0                |
| Azimuth (degrees):              | 0.0                 |
| Number Of Channels:             | 2048                |
| Energy Range (keV):             | 20 keV              |
| Energy per Channel (eV):        | 10.0eV              |
| Detector Type Id:               | 29                  |
| Detector Type:                  | X-Max               |
| Window Type:                    | SATW                |
| Pulse Pile Up Correction:       | Succeeded           |
| Primary Detector:               | 2617                |
| Primary Detector Serial Number: | 77871-X080          |

| Element | Line Type | Apparent Concentration | k Ratio | Wt%   | Wt% Sigma | Standard Label | Factory Standard | Standard Calibration Date |
|---------|-----------|------------------------|---------|-------|-----------|----------------|------------------|---------------------------|
| C       | K series  | 5.36                   | 0.05358 | 60.14 | 0.70      | C Vit          | Yes              |                           |
| O       | K series  | 4.98                   | 0.01675 | 25.44 | 0.56      | SiO2           | Yes              |                           |
| Na      | K series  | 1.50                   | 0.00633 | 3.98  | 0.13      | Albite         | Yes              |                           |
| P       | K         | 0.20                   | 0.00109 | 0.43  | 0.05      | GaP            | Yes              |                           |

|        |          |      |         |        |      |      |     |  |
|--------|----------|------|---------|--------|------|------|-----|--|
|        | series   |      |         |        |      |      |     |  |
| S      | K series | 1.09 | 0.00942 | 3.54   | 0.12 | FeS2 | Yes |  |
| Cl     | K series | 1.72 | 0.01501 | 5.94   | 0.16 | NaCl | Yes |  |
| K      | K series | 0.07 | 0.00063 | 0.25   | 0.05 | KBr  | Yes |  |
| Br     | L series | 0.07 | 0.00062 | 0.29   | 0.09 | KBr  | Yes |  |
| Total: |          |      |         | 100.00 |      |      |     |  |

Electron Image 36

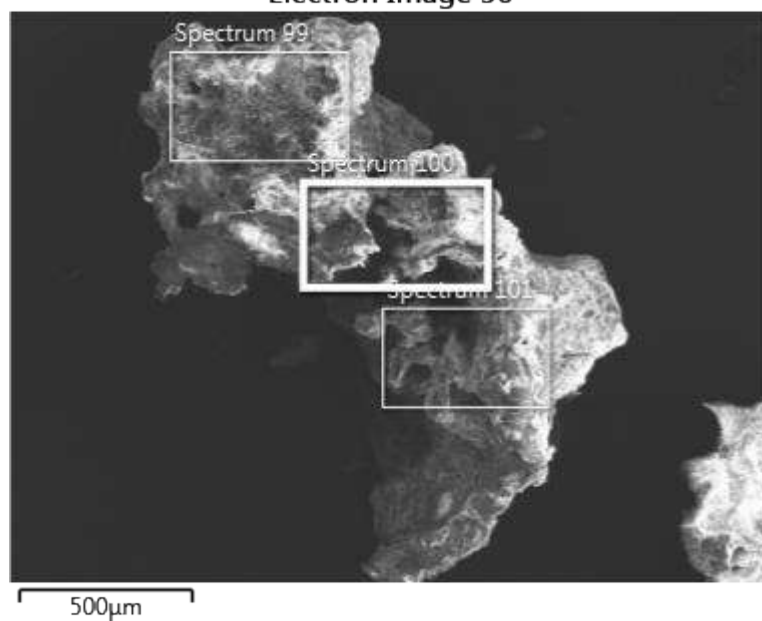

29/11/2019 10:47:02

Project 1

Cemento Mexico T3

CM3 15 Kv

Electron Image 36

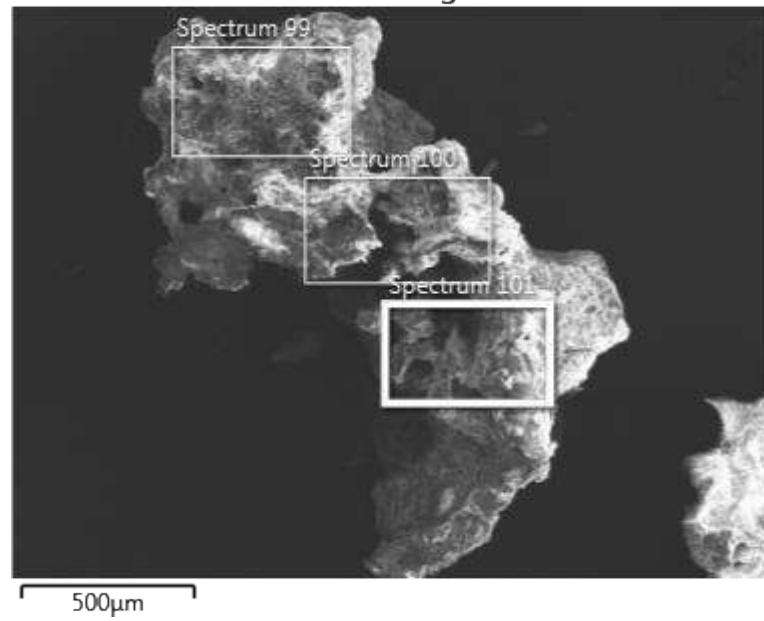

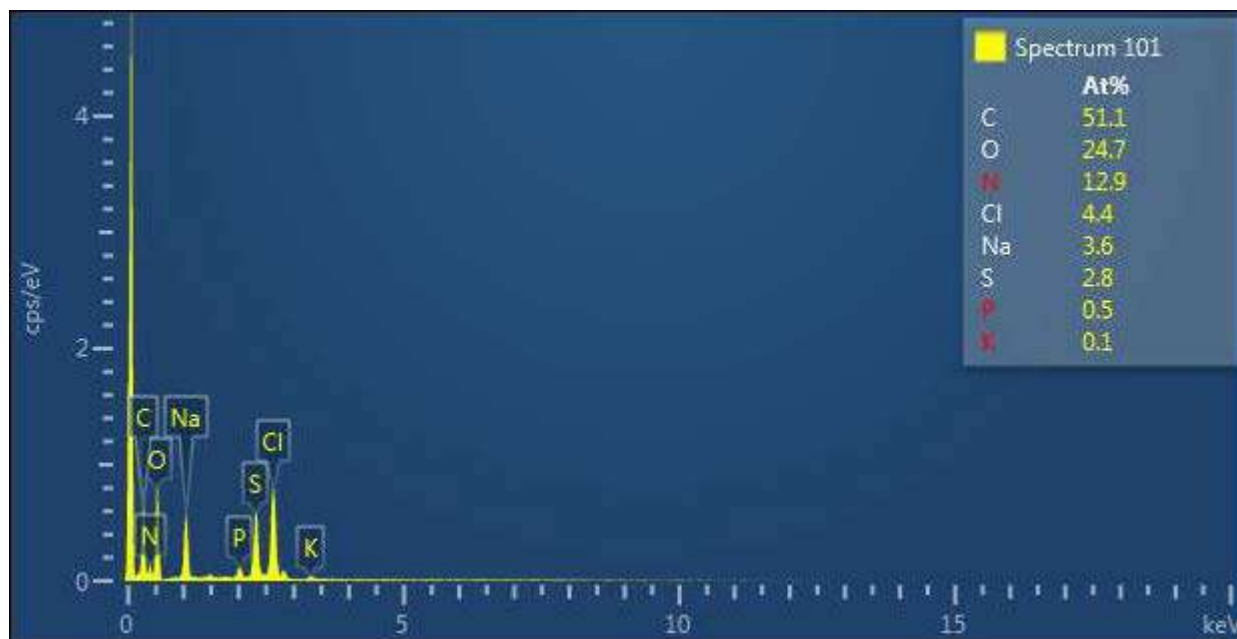

|                                 |                     |
|---------------------------------|---------------------|
| Label:                          | Spectrum 101        |
| Source:                         | Acquired            |
| Created:                        | 29/11/2019 10:47:02 |
| Livetime:                       | 60.2s               |
| Process Time:                   | 4                   |
| Accelerating Voltage:           | 15.00kV             |
| Magnification:                  | 51 x                |
| Working Distance:               | 9.9mm               |
| Specimen Tilt (degrees):        | 0.0                 |
| Elevation (degrees):            | 35.0                |
| Azimuth (degrees):              | 0.0                 |
| Number Of Channels:             | 2048                |
| Energy Range (keV):             | 20 keV              |
| Energy per Channel (eV):        | 10.0eV              |
| Detector Type Id:               | 29                  |
| Detector Type:                  | X-Max               |
| Window Type:                    | SATW                |
| Pulse Pile Up Correction:       | Succeeded           |
| Primary Detector:               | 2617                |
| Primary Detector Serial Number: | 77871-X080          |

| Element | Line Type | Apparent Concentration | k Ratio | Wt%   | Wt% Sigma | Standard Label | Factory Standard | Standard Calibration Date |
|---------|-----------|------------------------|---------|-------|-----------|----------------|------------------|---------------------------|
| C       | K series  | 1.14                   | 0.01139 | 39.95 | 1.61      | C Vit          | Yes              |                           |
| N       | K series  | 1.28                   | 0.00228 | 11.78 | 1.45      | BN             | Yes              |                           |
| O       | K series  | 2.34                   | 0.00789 | 25.74 | 0.93      | SiO2           | Yes              |                           |
| Na      | K         | 0.96                   | 0.00406 | 5.32  | 0.24      | Albite         | Yes              |                           |

|        |          |      |         |        |      |      |     |  |
|--------|----------|------|---------|--------|------|------|-----|--|
|        | series   |      |         |        |      |      |     |  |
| P      | K series | 0.20 | 0.00113 | 0.92   | 0.10 | GaP  | Yes |  |
| S      | K series | 0.88 | 0.00760 | 5.82   | 0.25 | FeS2 | Yes |  |
| Cl     | K series | 1.42 | 0.01240 | 10.16  | 0.38 | NaCl | Yes |  |
| K      | K series | 0.05 | 0.00039 | 0.32   | 0.10 | KBr  | Yes |  |
| Total: |          |      |         | 100.00 |      |      |     |  |

Electron Image 36

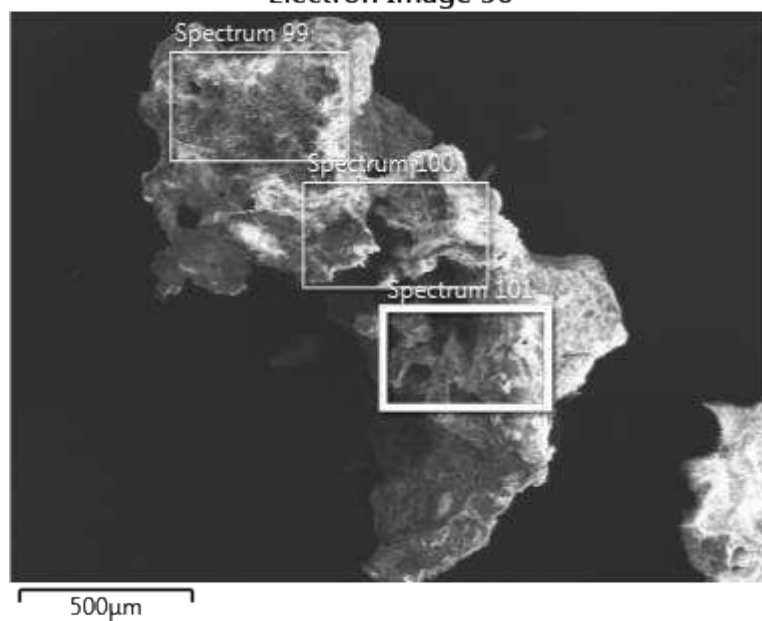

29/11/2019 10:48:59

Project 1

Cemento Mexico T3

CM4 15 Kv

Electron Image 37

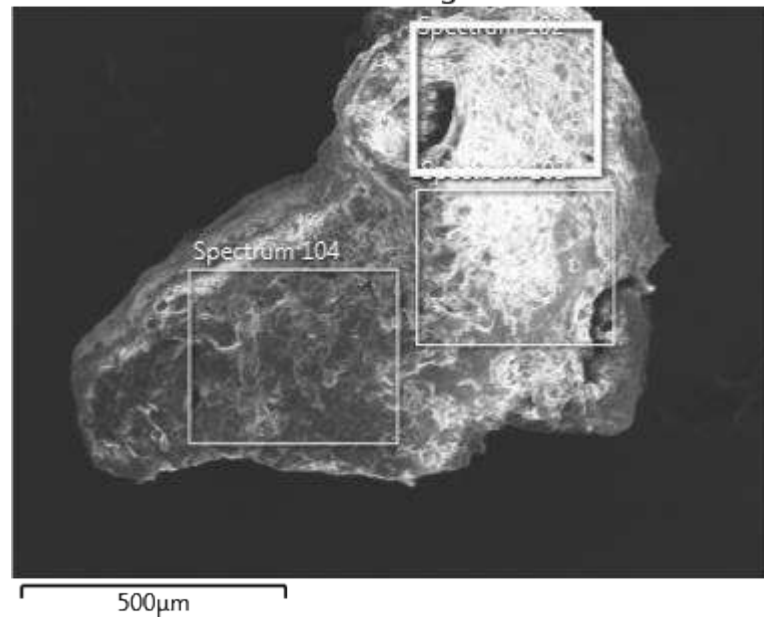

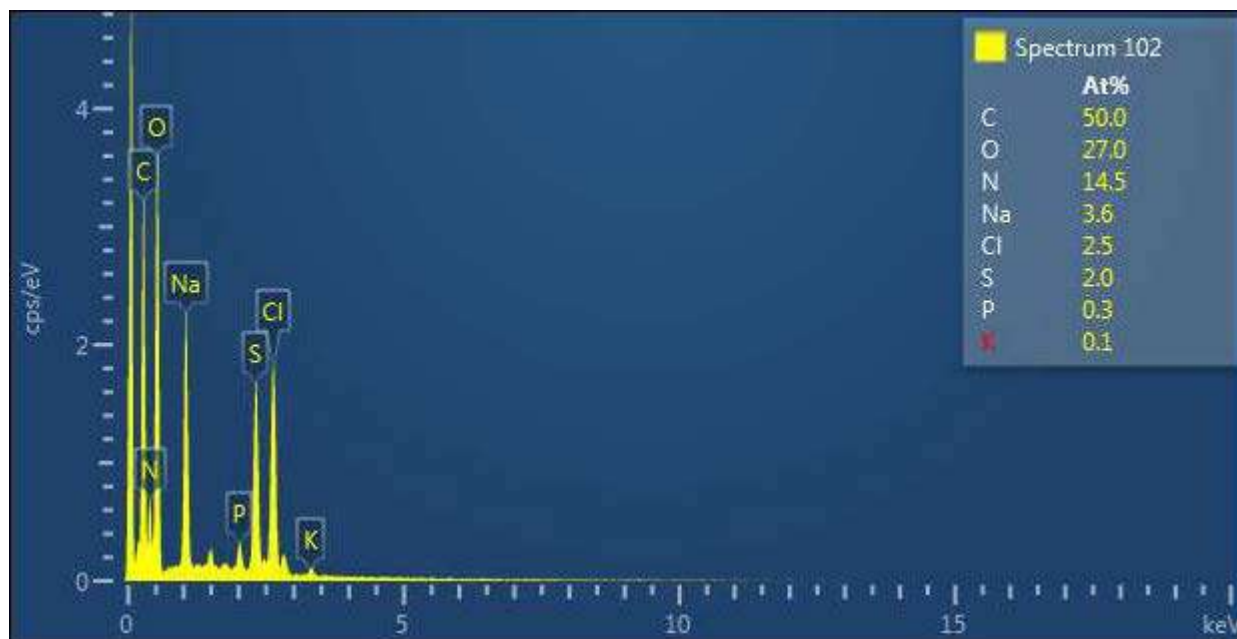

|                                 |                     |
|---------------------------------|---------------------|
| Label:                          | Spectrum 102        |
| Source:                         | Acquired            |
| Created:                        | 29/11/2019 10:48:59 |
| Livetime:                       | 60.1s               |
| Process Time:                   | 4                   |
| Accelerating Voltage:           | 15.00kV             |
| Magnification:                  | 78 x                |
| Working Distance:               | 9.9mm               |
| Specimen Tilt (degrees):        | 0.0                 |
| Elevation (degrees):            | 35.0                |
| Azimuth (degrees):              | 0.0                 |
| Number Of Channels:             | 2048                |
| Energy Range (keV):             | 20 keV              |
| Energy per Channel (eV):        | 10.0eV              |
| Detector Type Id:               | 29                  |
| Detector Type:                  | X-Max               |
| Window Type:                    | SATW                |
| Pulse Pile Up Correction:       | Succeeded           |
| Primary Detector:               | 2617                |
| Primary Detector Serial Number: | 77871-X080          |

| Element | Line Type | Apparent Concentration | k Ratio | Wt%   | Wt% Sigma | Standard Label | Factory Standard | Standard Calibration Date |
|---------|-----------|------------------------|---------|-------|-----------|----------------|------------------|---------------------------|
| C       | K series  | 5.97                   | 0.05970 | 40.43 | 0.72      | C Vit          | Yes              |                           |
| N       | K series  | 6.27                   | 0.01117 | 13.66 | 0.75      | BN             | Yes              |                           |
| O       | K series  | 10.54                  | 0.03546 | 29.07 | 0.48      | SiO2           | Yes              |                           |
| Na      | K         | 3.77                   | 0.01592 | 5.55  | 0.12      | Albite         | Yes              |                           |



|        |          |      |         |        |      |      |     |  |
|--------|----------|------|---------|--------|------|------|-----|--|
|        | series   |      |         |        |      |      |     |  |
| P      | K series | 0.50 | 0.00279 | 0.59   | 0.04 | GaP  | Yes |  |
| S      | K series | 2.53 | 0.02182 | 4.40   | 0.10 | FeS2 | Yes |  |
| Cl     | K series | 3.24 | 0.02829 | 6.02   | 0.13 | NaCl | Yes |  |
| K      | K series | 0.15 | 0.00130 | 0.27   | 0.04 | KBr  | Yes |  |
| Total: |          |      |         | 100.00 |      |      |     |  |

Electron Image 37

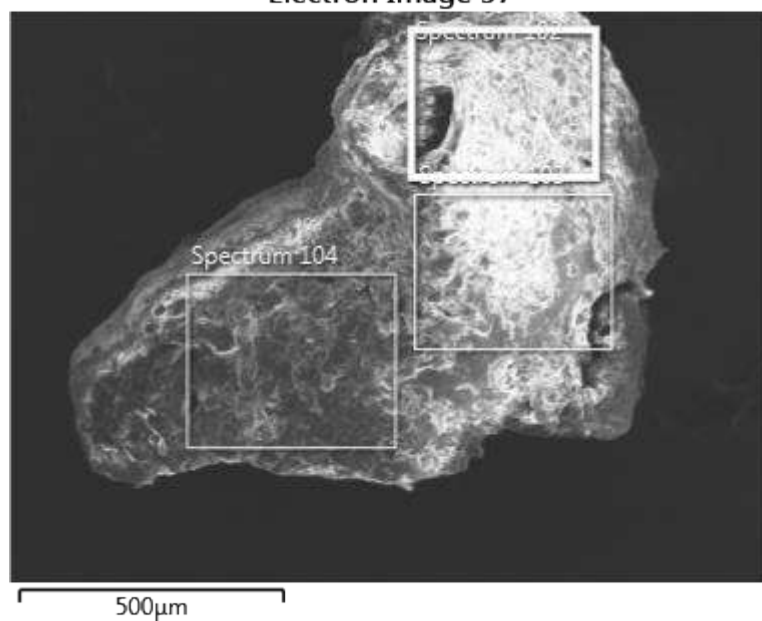

29/11/2019 10:50:07

Project 1

Cemento Mexico T3

CM4 15 Kv

Electron Image 37

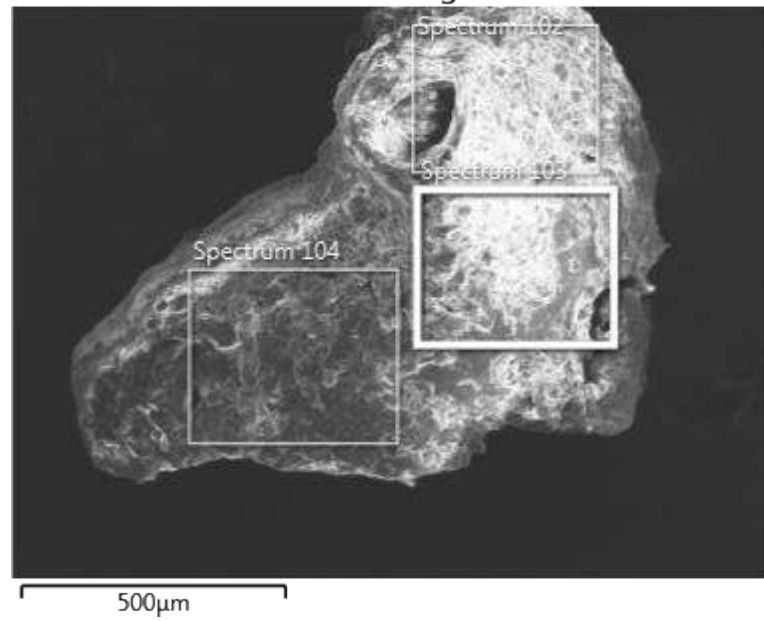

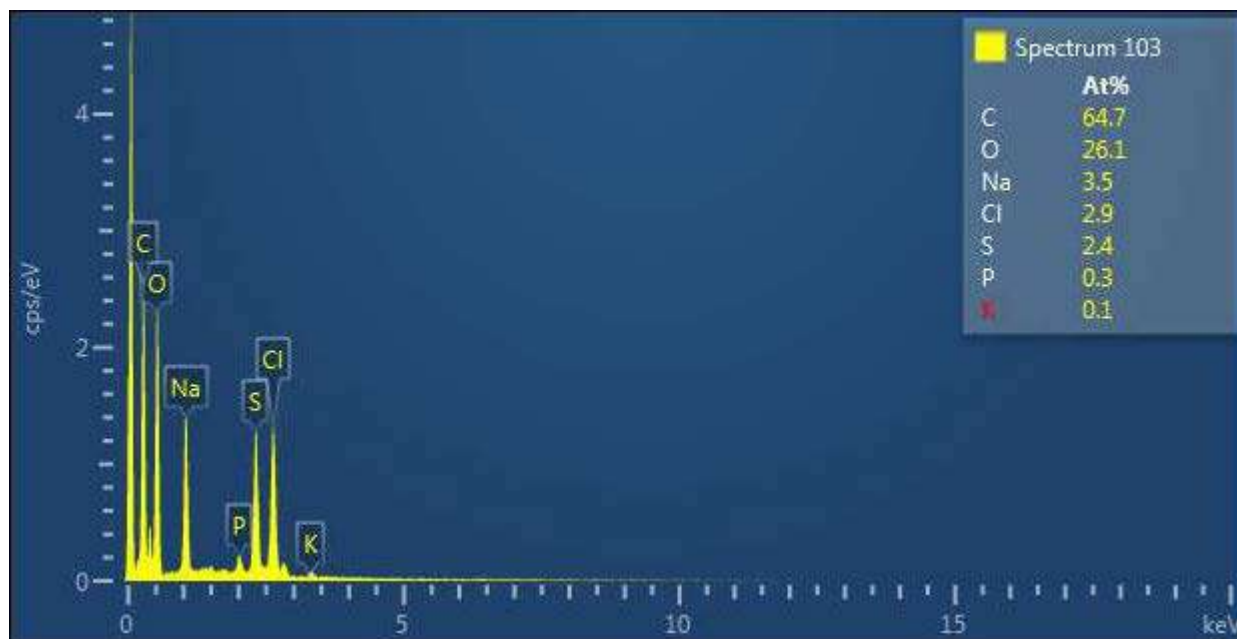

|                                 |                     |
|---------------------------------|---------------------|
| Label:                          | Spectrum 103        |
| Source:                         | Acquired            |
| Created:                        | 29/11/2019 10:50:07 |
| Livetime:                       | 60.1s               |
| Process Time:                   | 4                   |
| Accelerating Voltage:           | 15.00kV             |
| Magnification:                  | 78 x                |
| Working Distance:               | 9.9mm               |
| Specimen Tilt (degrees):        | 0.0                 |
| Elevation (degrees):            | 35.0                |
| Azimuth (degrees):              | 0.0                 |
| Number Of Channels:             | 2048                |
| Energy Range (keV):             | 20 keV              |
| Energy per Channel (eV):        | 10.0eV              |
| Detector Type Id:               | 29                  |
| Detector Type:                  | X-Max               |
| Window Type:                    | SATW                |
| Pulse Pile Up Correction:       | Succeeded           |
| Primary Detector:               | 2617                |
| Primary Detector Serial Number: | 77871-X080          |

| Element | Line Type | Apparent Concentration | k Ratio | Wt%   | Wt% Sigma | Standard Label | Factory Standard | Standard Calibration Date |
|---------|-----------|------------------------|---------|-------|-----------|----------------|------------------|---------------------------|
| C       | K series  | 4.40                   | 0.04401 | 52.89 | 0.78      | C Vit          | Yes              |                           |
| O       | K series  | 6.76                   | 0.02274 | 28.39 | 0.57      | SiO2           | Yes              |                           |
| Na      | K series  | 2.37                   | 0.01001 | 5.53  | 0.15      | Albite         | Yes              |                           |
| P       | K         | 0.32                   | 0.00176 | 0.61  | 0.06      | GaP            | Yes              |                           |

|        |          |      |         |        |      |      |     |  |
|--------|----------|------|---------|--------|------|------|-----|--|
|        | series   |      |         |        |      |      |     |  |
| S      | K series | 1.88 | 0.01618 | 5.32   | 0.14 | FeS2 | Yes |  |
| Cl     | K series | 2.26 | 0.01973 | 6.90   | 0.17 | NaCl | Yes |  |
| K      | K series | 0.12 | 0.00106 | 0.37   | 0.06 | KBr  | Yes |  |
| Total: |          |      |         | 100.00 |      |      |     |  |

Electron Image 37

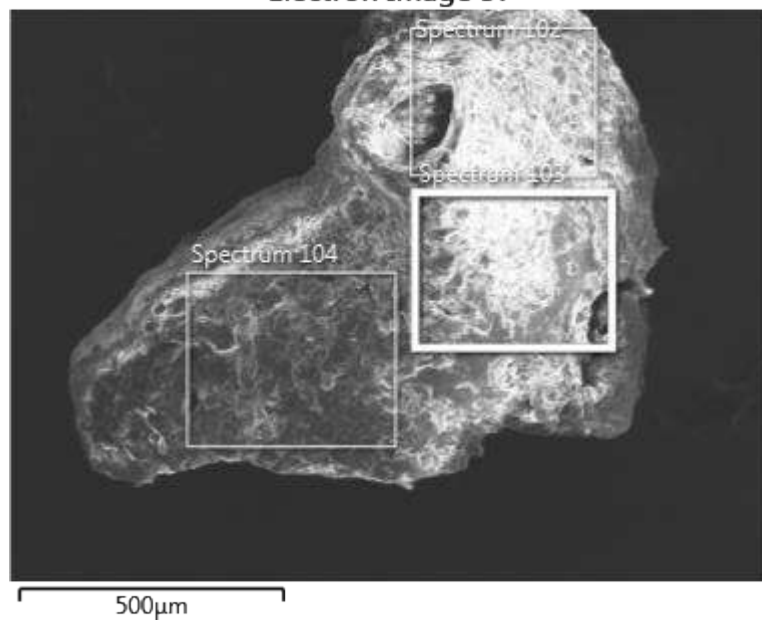

29/11/2019 10:51:15

Project 1

Cemento Mexico T3

CM4 15 Kv

Electron Image 37

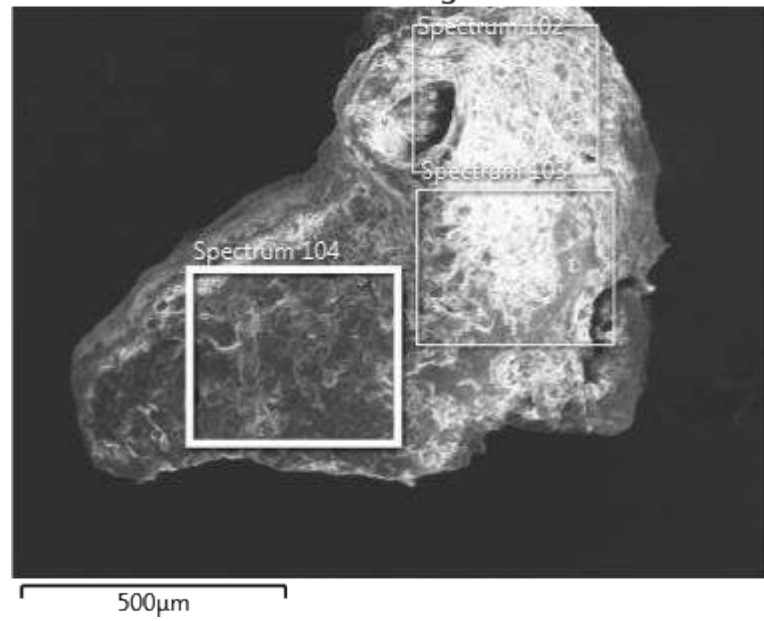

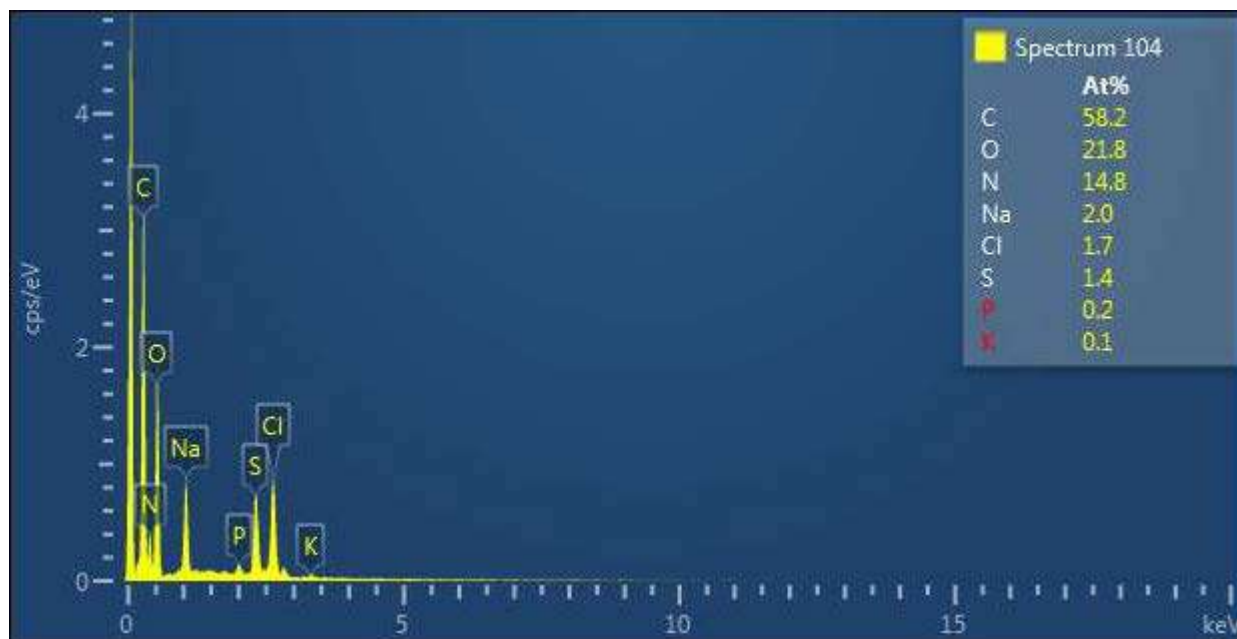

|                                 |                     |
|---------------------------------|---------------------|
| Label:                          | Spectrum 104        |
| Source:                         | Acquired            |
| Created:                        | 29/11/2019 10:51:15 |
| Livetime:                       | 60.5s               |
| Process Time:                   | 4                   |
| Accelerating Voltage:           | 15.00kV             |
| Magnification:                  | 78 x                |
| Working Distance:               | 9.9mm               |
| Specimen Tilt (degrees):        | 0.0                 |
| Elevation (degrees):            | 35.0                |
| Azimuth (degrees):              | 0.0                 |
| Number Of Channels:             | 2048                |
| Energy Range (keV):             | 20 keV              |
| Energy per Channel (eV):        | 10.0eV              |
| Detector Type Id:               | 29                  |
| Detector Type:                  | X-Max               |
| Window Type:                    | SATW                |
| Pulse Pile Up Correction:       | Succeeded           |
| Primary Detector:               | 2617                |
| Primary Detector Serial Number: | 77871-X080          |

| Element | Line Type | Apparent Concentration | k Ratio | Wt%   | Wt% Sigma | Standard Label | Factory Standard | Standard Calibration Date |
|---------|-----------|------------------------|---------|-------|-----------|----------------|------------------|---------------------------|
| C       | K series  | 6.00                   | 0.06005 | 49.52 | 0.87      | C Vit          | Yes              |                           |
| N       | K series  | 3.79                   | 0.00675 | 14.66 | 1.02      | BN             | Yes              |                           |
| O       | K series  | 5.08                   | 0.01711 | 24.69 | 0.56      | SiO2           | Yes              |                           |
| Na      | K         | 1.37                   | 0.00578 | 3.21  | 0.11      | Albite         | Yes              |                           |

|        |          |      |         |        |      |      |     |  |
|--------|----------|------|---------|--------|------|------|-----|--|
|        | series   |      |         |        |      |      |     |  |
| P      | K series | 0.18 | 0.00100 | 0.34   | 0.05 | GaP  | Yes |  |
| S      | K series | 1.12 | 0.00961 | 3.09   | 0.10 | FeS2 | Yes |  |
| Cl     | K series | 1.47 | 0.01283 | 4.33   | 0.13 | NaCl | Yes |  |
| K      | K series | 0.06 | 0.00047 | 0.16   | 0.05 | KBr  | Yes |  |
| Total: |          |      |         | 100.00 |      |      |     |  |

Electron Image 37

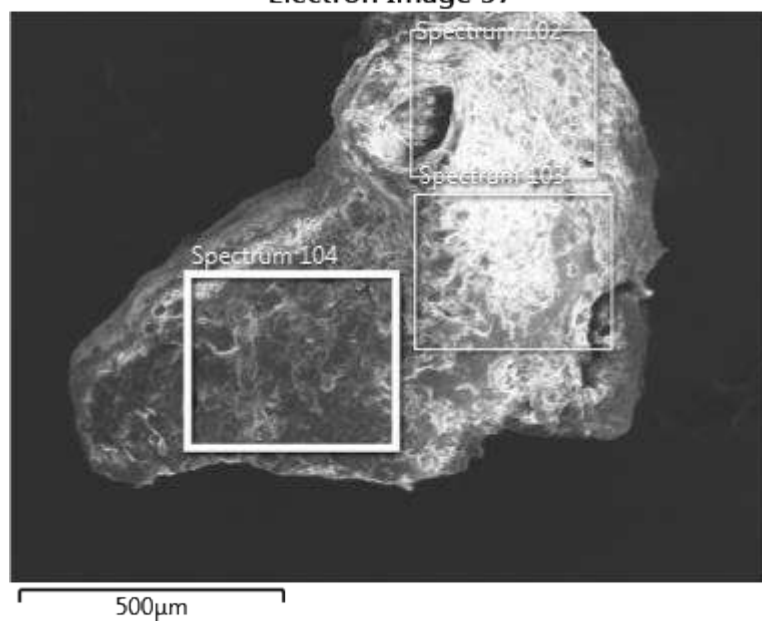

29/11/2019 12:13:20

Project 1

Glandulas salivares Mexico T1

GSM1 15 Kv

Electron Image 38

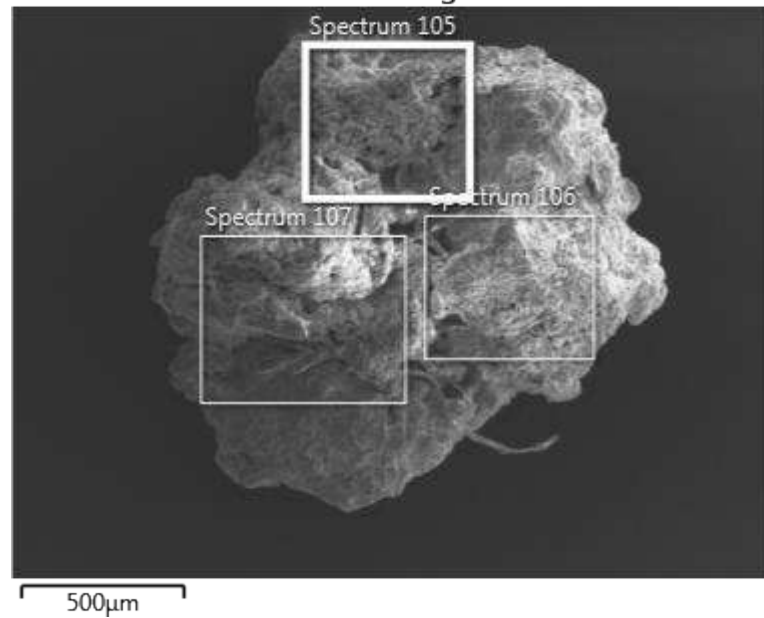



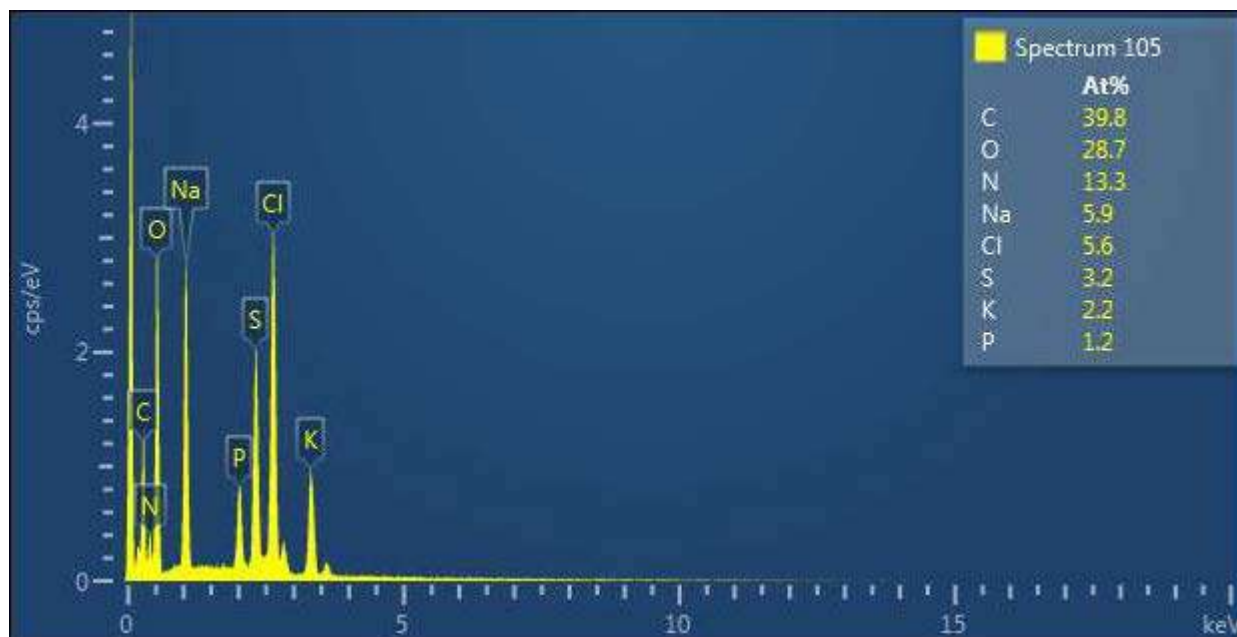

|                                 |                     |
|---------------------------------|---------------------|
| Label:                          | Spectrum 105        |
| Source:                         | Acquired            |
| Created:                        | 29/11/2019 12:13:20 |
| Livetime:                       | 60.4s               |
| Process Time:                   | 4                   |
| Accelerating Voltage:           | 15.00kV             |
| Magnification:                  | 48 x                |
| Working Distance:               | 9.8mm               |
| Specimen Tilt (degrees):        | 0.0                 |
| Elevation (degrees):            | 35.0                |
| Azimuth (degrees):              | 0.0                 |
| Number Of Channels:             | 2048                |
| Energy Range (keV):             | 20 keV              |
| Energy per Channel (eV):        | 10.0eV              |
| Detector Type Id:               | 29                  |
| Detector Type:                  | X-Max               |
| Window Type:                    | SATW                |
| Pulse Pile Up Correction:       | Succeeded           |
| Primary Detector:               | 2617                |
| Primary Detector Serial Number: | 77871-X080          |

| Element | Line Type | Apparent Concentration | k Ratio | Wt%   | Wt% Sigma | Standard Label | Factory Standard | Standard Calibration Date |
|---------|-----------|------------------------|---------|-------|-----------|----------------|------------------|---------------------------|
| C       | K series  | 2.22                   | 0.02216 | 28.38 | 0.95      | C Vit          | Yes              |                           |
| N       | K series  | 3.98                   | 0.00709 | 11.07 | 0.75      | BN             | Yes              |                           |
| O       | K series  | 8.26                   | 0.02779 | 27.28 | 0.52      | SiO2           | Yes              |                           |
| Na      | K         | 4.67                   | 0.01970 | 8.02  | 0.17      | Albite         | Yes              |                           |

|        |          |      |         |        |      |                  |     |  |
|--------|----------|------|---------|--------|------|------------------|-----|--|
|        | series   |      |         |        |      |                  |     |  |
| P      | K series | 1.58 | 0.00886 | 2.23   | 0.08 | GaP              | Yes |  |
| S      | K series | 3.00 | 0.02584 | 6.18   | 0.14 | FeS <sub>2</sub> | Yes |  |
| Cl     | K series | 5.29 | 0.04623 | 11.75  | 0.23 | NaCl             | Yes |  |
| K      | K series | 2.36 | 0.02000 | 5.09   | 0.13 | KBr              | Yes |  |
| Total: |          |      |         | 100.00 |      |                  |     |  |

Electron Image 38

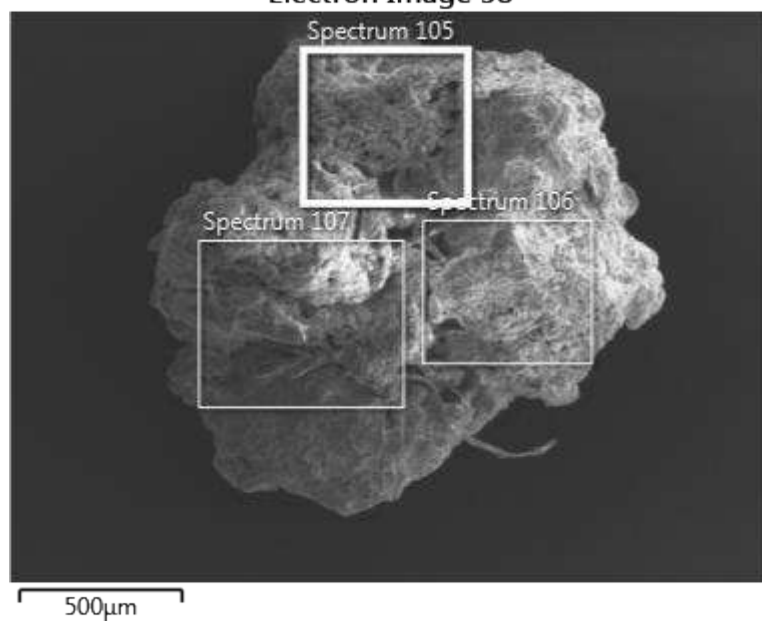

29/11/2019 12:14:29

Project 1

Glandulas salivares Mexico T1

GSM1 15 Kv

Electron Image 38

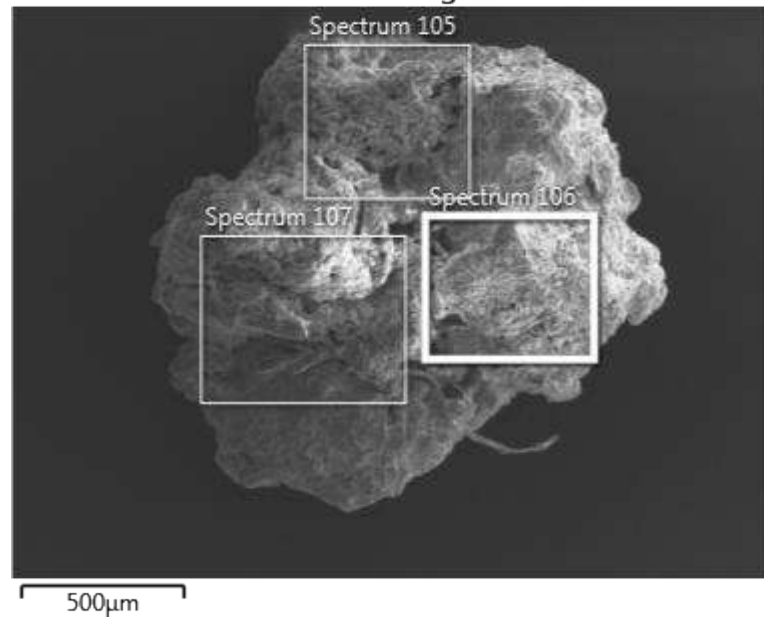

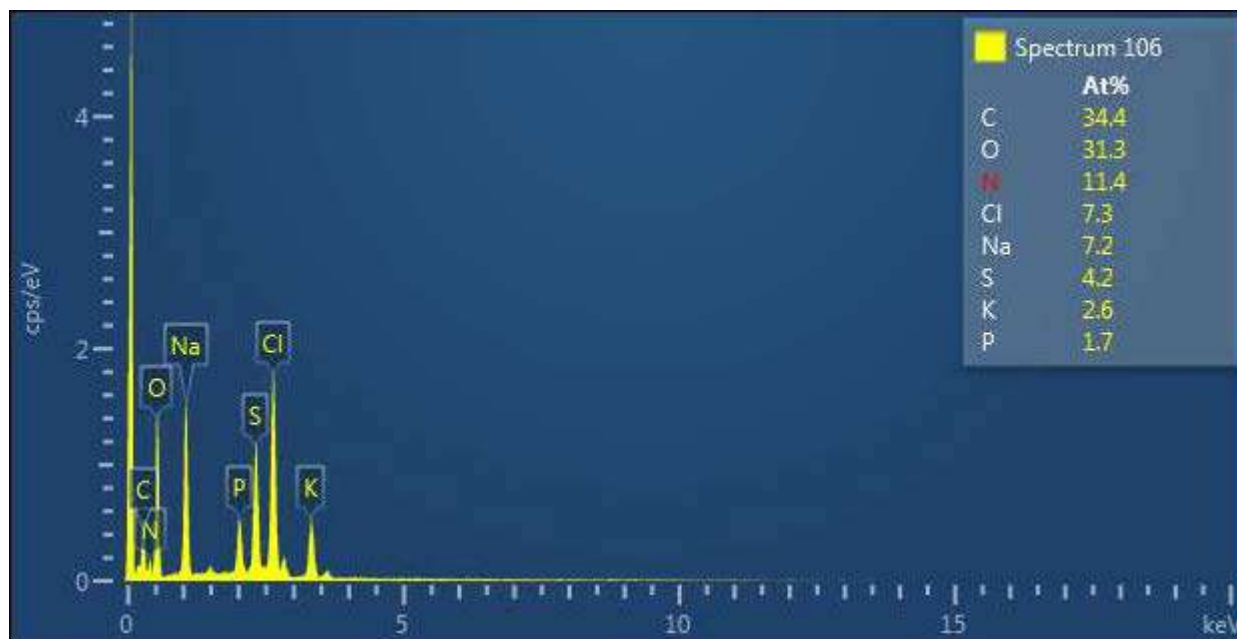

|                                 |                     |
|---------------------------------|---------------------|
| Label:                          | Spectrum 106        |
| Source:                         | Acquired            |
| Created:                        | 29/11/2019 12:14:29 |
| Livetime:                       | 60.1s               |
| Process Time:                   | 4                   |
| Accelerating Voltage:           | 15.00kV             |
| Magnification:                  | 48 x                |
| Working Distance:               | 9.8mm               |
| Specimen Tilt (degrees):        | 0.0                 |
| Elevation (degrees):            | 35.0                |
| Azimuth (degrees):              | 0.0                 |
| Number Of Channels:             | 2048                |
| Energy Range (keV):             | 20 keV              |
| Energy per Channel (eV):        | 10.0eV              |
| Detector Type Id:               | 29                  |
| Detector Type:                  | X-Max               |
| Window Type:                    | SATW                |
| Pulse Pile Up Correction:       | Succeeded           |
| Primary Detector:               | 2617                |
| Primary Detector Serial Number: | 77871-X080          |

| Element | Line Type | Apparent Concentration | k Ratio | Wt%   | Wt% Sigma | Standard Label | Factory Standard | Standard Calibration Date |
|---------|-----------|------------------------|---------|-------|-----------|----------------|------------------|---------------------------|
| C       | K series  | 0.72                   | 0.00717 | 23.12 | 1.63      | C Vit          | Yes              |                           |
| N       | K series  | 1.53                   | 0.00272 | 8.91  | 1.07      | BN             | Yes              |                           |
| O       | K series  | 4.20                   | 0.01414 | 28.03 | 0.81      | SiO2           | Yes              |                           |
| Na      | K         | 2.59                   | 0.01095 | 9.26  | 0.29      | Albite         | Yes              |                           |

|        |          |      |         |        |      |      |     |  |
|--------|----------|------|---------|--------|------|------|-----|--|
|        | series   |      |         |        |      |      |     |  |
| P      | K series | 1.00 | 0.00561 | 2.95   | 0.14 | GaP  | Yes |  |
| S      | K series | 1.74 | 0.01496 | 7.49   | 0.25 | FeS2 | Yes |  |
| Cl     | K series | 3.09 | 0.02703 | 14.48  | 0.41 | NaCl | Yes |  |
| K      | K series | 1.27 | 0.01073 | 5.77   | 0.22 | KBr  | Yes |  |
| Total: |          |      |         | 100.00 |      |      |     |  |

Electron Image 38

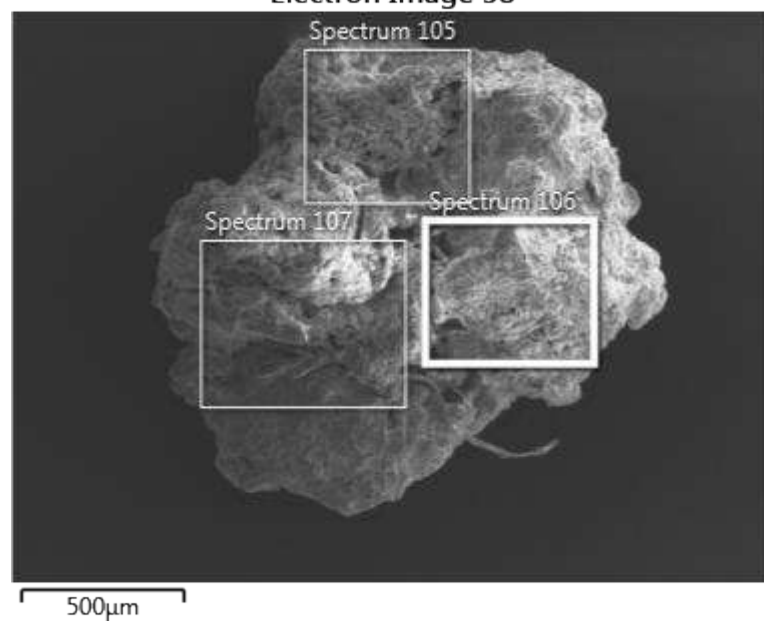

29/11/2019 12:15:36

Project 1

Glandulas salivares Mexico T1

GSM1 15 Kv

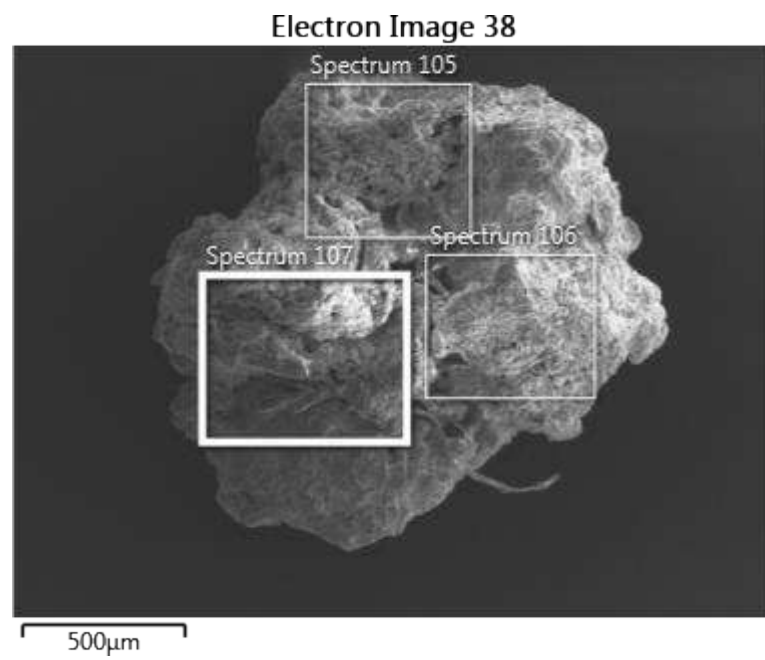

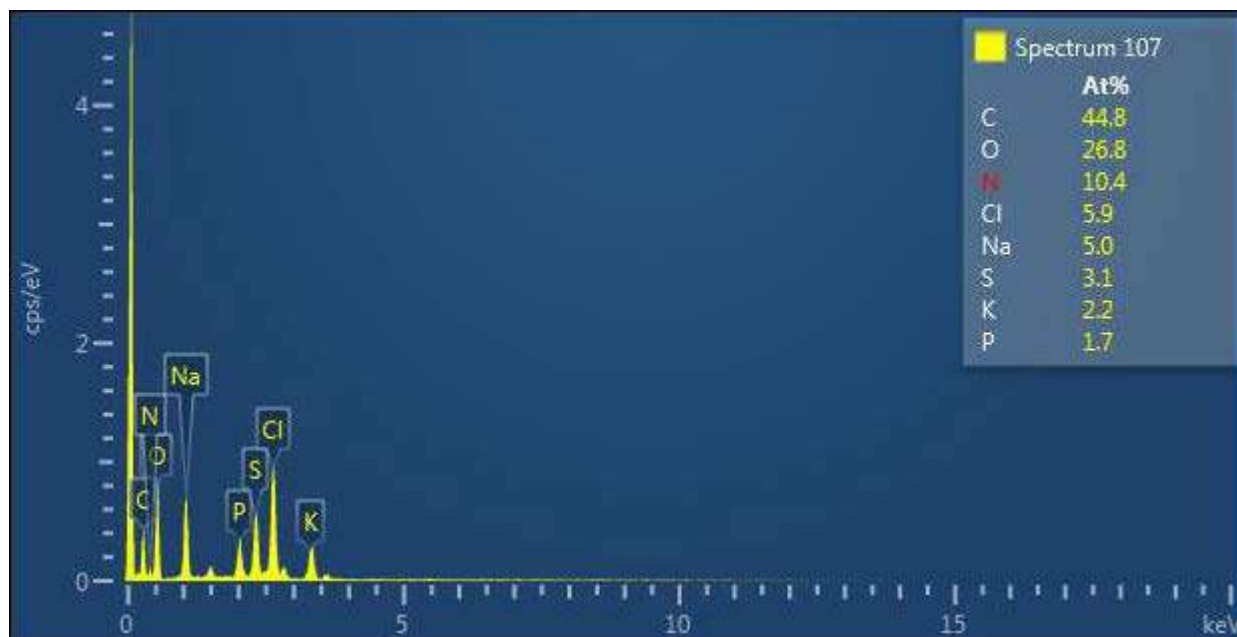

|                                 |                     |
|---------------------------------|---------------------|
| Label:                          | Spectrum 107        |
| Source:                         | Acquired            |
| Created:                        | 29/11/2019 12:15:36 |
| Livetime:                       | 60.4s               |
| Process Time:                   | 4                   |
| Accelerating Voltage:           | 15.00kV             |
| Magnification:                  | 48 x                |
| Working Distance:               | 9.8mm               |
| Specimen Tilt (degrees):        | 0.0                 |
| Elevation (degrees):            | 35.0                |
| Azimuth (degrees):              | 0.0                 |
| Number Of Channels:             | 2048                |
| Energy Range (keV):             | 20 keV              |
| Energy per Channel (eV):        | 10.0eV              |
| Detector Type Id:               | 29                  |
| Detector Type:                  | X-Max               |
| Window Type:                    | SATW                |
| Pulse Pile Up Correction:       | Succeeded           |
| Primary Detector:               | 2617                |
| Primary Detector Serial Number: | 77871-X080          |

| Element | Line Type | Apparent Concentration | k Ratio | Wt%   | Wt% Sigma | Standard Label | Factory Standard | Standard Calibration Date |
|---------|-----------|------------------------|---------|-------|-----------|----------------|------------------|---------------------------|
| C       | K series  | 0.73                   | 0.00726 | 32.12 | 1.83      | C Vit          | Yes              |                           |
| N       | K series  | 0.86                   | 0.00153 | 8.65  | 1.43      | BN             | Yes              |                           |
| O       | K series  | 2.27                   | 0.00765 | 25.60 | 0.96      | SiO2           | Yes              |                           |
| Na      | K         | 1.21                   | 0.00512 | 6.91  | 0.29      | Albite         | Yes              |                           |

|        |          |      |         |        |      |      |     |  |
|--------|----------|------|---------|--------|------|------|-----|--|
|        | series   |      |         |        |      |      |     |  |
| P      | K series | 0.66 | 0.00370 | 3.10   | 0.17 | GaP  | Yes |  |
| S      | K series | 0.87 | 0.00746 | 5.98   | 0.26 | FeS2 | Yes |  |
| Cl     | K series | 1.68 | 0.01464 | 12.47  | 0.46 | NaCl | Yes |  |
| K      | K series | 0.72 | 0.00606 | 5.18   | 0.25 | KBr  | Yes |  |
| Total: |          |      |         | 100.00 |      |      |     |  |

Electron Image 38

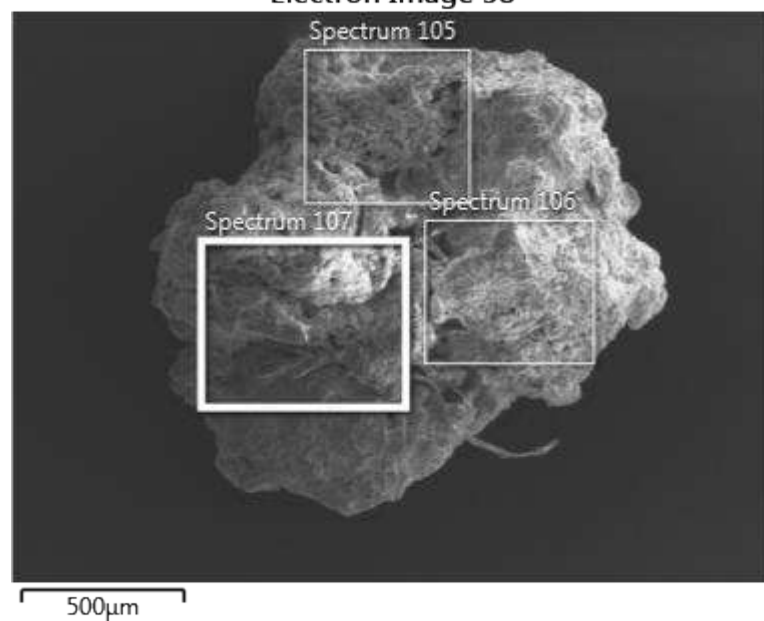



29/11/2019 12:24:12

Project 1

Glandulas salivares Mexico T1

GSM2 15 Kv

Electron Image 39

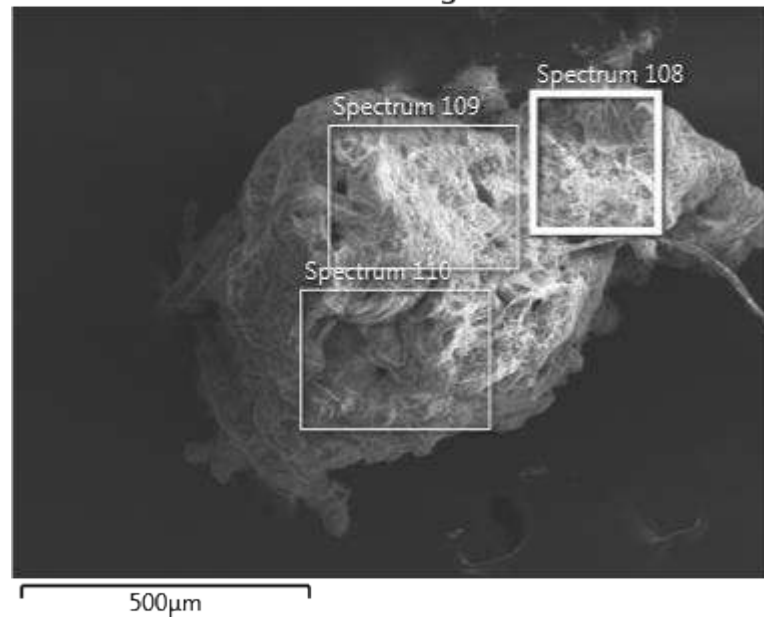

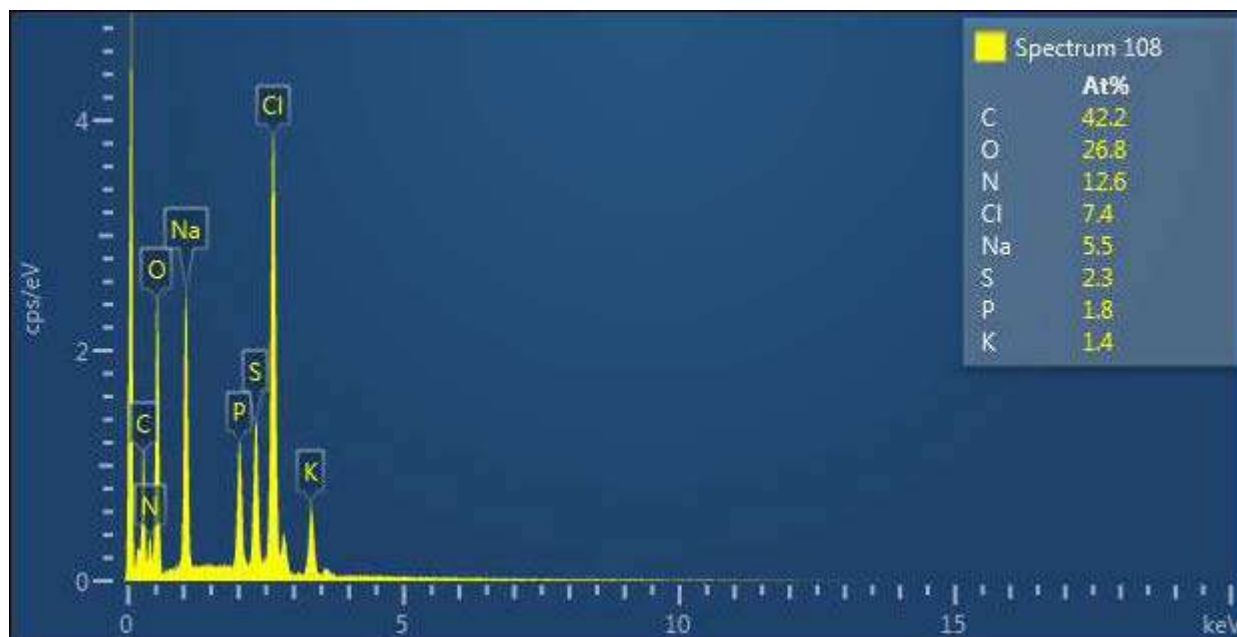

|                                 |                     |
|---------------------------------|---------------------|
| Label:                          | Spectrum 108        |
| Source:                         | Acquired            |
| Created:                        | 29/11/2019 12:24:12 |
| Livetime:                       | 60.5s               |
| Process Time:                   | 4                   |
| Accelerating Voltage:           | 15.00kV             |
| Magnification:                  | 85 x                |
| Working Distance:               | 9.8mm               |
| Specimen Tilt (degrees):        | 0.0                 |
| Elevation (degrees):            | 35.0                |
| Azimuth (degrees):              | 0.0                 |
| Number Of Channels:             | 2048                |
| Energy Range (keV):             | 20 keV              |
| Energy per Channel (eV):        | 10.0eV              |
| Detector Type Id:               | 29                  |
| Detector Type:                  | X-Max               |
| Window Type:                    | SATW                |
| Pulse Pile Up Correction:       | Succeeded           |
| Primary Detector:               | 2617                |
| Primary Detector Serial Number: | 77871-X080          |

| Element | Line Type | Apparent Concentration | k Ratio | Wt%   | Wt% Sigma | Standard Label | Factory Standard | Standard Calibration Date |
|---------|-----------|------------------------|---------|-------|-----------|----------------|------------------|---------------------------|
| C       | K series  | 2.01                   | 0.02014 | 30.08 | 1.03      | C Vit          | Yes              |                           |
| N       | K series  | 3.47                   | 0.00618 | 10.43 | 0.79      | BN             | Yes              |                           |
| O       | K series  | 7.28                   | 0.02448 | 25.40 | 0.53      | SiO2           | Yes              |                           |
| Na      | K         | 4.25                   | 0.01793 | 7.49  | 0.17      | Albite         | Yes              |                           |

|        |          |      |         |        |      |      |     |  |
|--------|----------|------|---------|--------|------|------|-----|--|
|        | series   |      |         |        |      |      |     |  |
| P      | K series | 2.29 | 0.01278 | 3.32   | 0.10 | GaP  | Yes |  |
| S      | K series | 2.05 | 0.01762 | 4.38   | 0.12 | FeS2 | Yes |  |
| Cl     | K series | 6.79 | 0.05933 | 15.58  | 0.30 | NaCl | Yes |  |
| K      | K series | 1.47 | 0.01248 | 3.33   | 0.11 | KBr  | Yes |  |
| Total: |          |      |         | 100.00 |      |      |     |  |

Electron Image 39

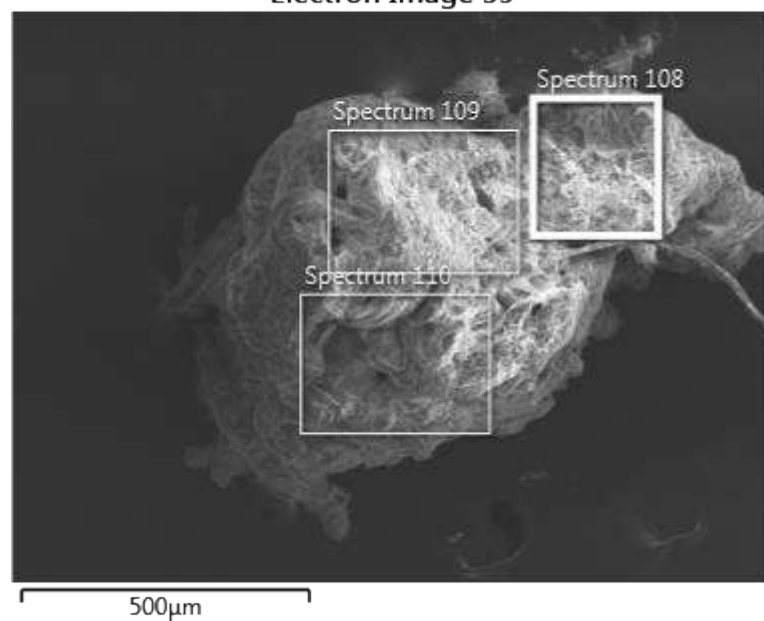

29/11/2019 12:25:22

Project 1

Glandulas salivares Mexico T1

GSM2 15 Kv

Electron Image 39

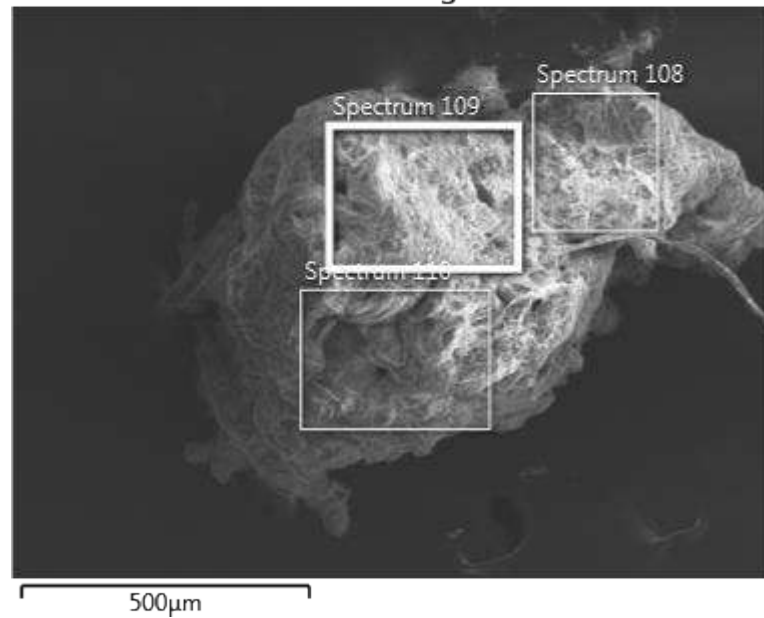

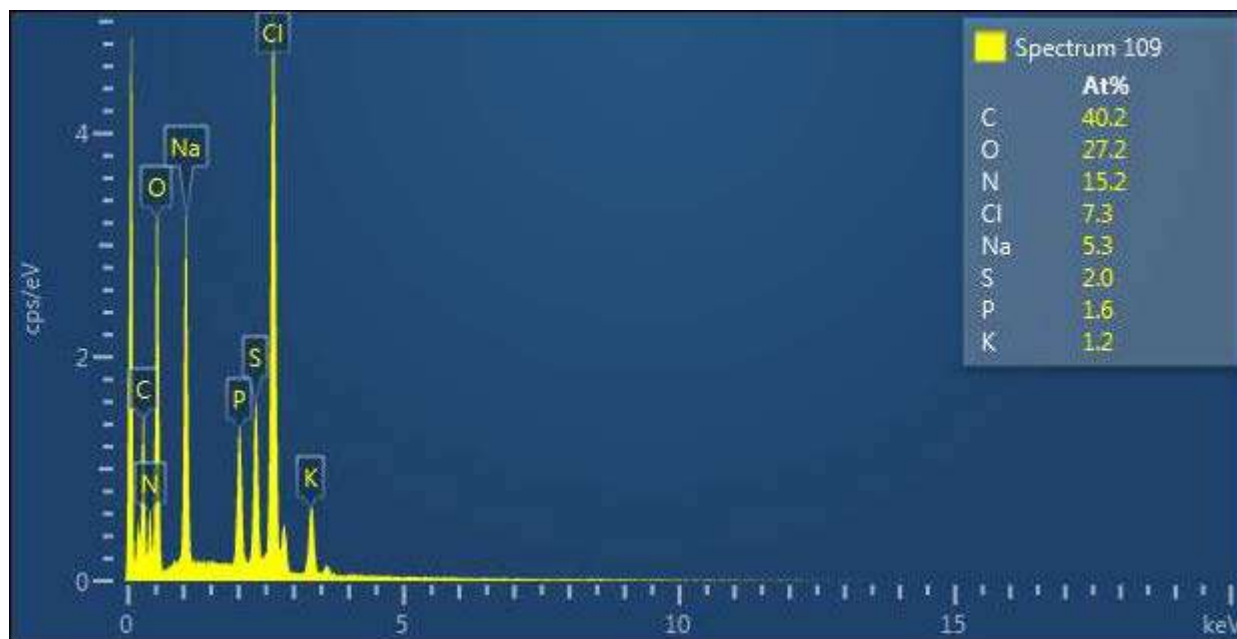

|                                 |                     |
|---------------------------------|---------------------|
| Label:                          | Spectrum 109        |
| Source:                         | Acquired            |
| Created:                        | 29/11/2019 12:25:22 |
| Livetime:                       | 60.3s               |
| Process Time:                   | 4                   |
| Accelerating Voltage:           | 15.00kV             |
| Magnification:                  | 85 x                |
| Working Distance:               | 9.8mm               |
| Specimen Tilt (degrees):        | 0.0                 |
| Elevation (degrees):            | 35.0                |
| Azimuth (degrees):              | 0.0                 |
| Number Of Channels:             | 2048                |
| Energy Range (keV):             | 20 keV              |
| Energy per Channel (eV):        | 10.0eV              |
| Detector Type Id:               | 29                  |
| Detector Type:                  | X-Max               |
| Window Type:                    | SATW                |
| Pulse Pile Up Correction:       | Succeeded           |
| Primary Detector:               | 2617                |
| Primary Detector Serial Number: | 77871-X080          |

| Element | Line Type | Apparent Concentration | k Ratio | Wt%   | Wt% Sigma | Standard Label | Factory Standard | Standard Calibration Date |
|---------|-----------|------------------------|---------|-------|-----------|----------------|------------------|---------------------------|
| C       | K series  | 2.58                   | 0.02585 | 28.86 | 0.91      | C Vit          | Yes              |                           |
| N       | K series  | 5.80                   | 0.01033 | 12.72 | 0.69      | BN             | Yes              |                           |
| O       | K series  | 9.66                   | 0.03252 | 26.07 | 0.48      | SiO2           | Yes              |                           |
| Na      | K         | 5.34                   | 0.02252 | 7.30  | 0.15      | Albite         | Yes              |                           |

|        |          |      |         |        |      |      |     |  |
|--------|----------|------|---------|--------|------|------|-----|--|
|        | series   |      |         |        |      |      |     |  |
| P      | K series | 2.66 | 0.01487 | 2.98   | 0.08 | GaP  | Yes |  |
| S      | K series | 2.37 | 0.02041 | 3.90   | 0.10 | FeS2 | Yes |  |
| Cl     | K series | 8.78 | 0.07669 | 15.45  | 0.27 | NaCl | Yes |  |
| K      | K series | 1.56 | 0.01325 | 2.71   | 0.09 | KBr  | Yes |  |
| Total: |          |      |         | 100.00 |      |      |     |  |

Electron Image 39

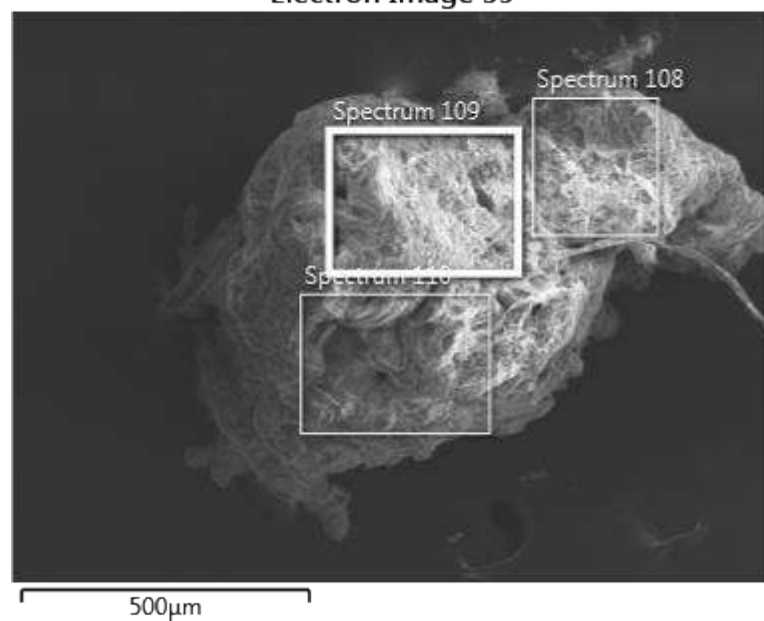

29/11/2019 12:26:31

Project 1

Glandulas salivares Mexico T1

GSM2 15 Kv

Electron Image 39

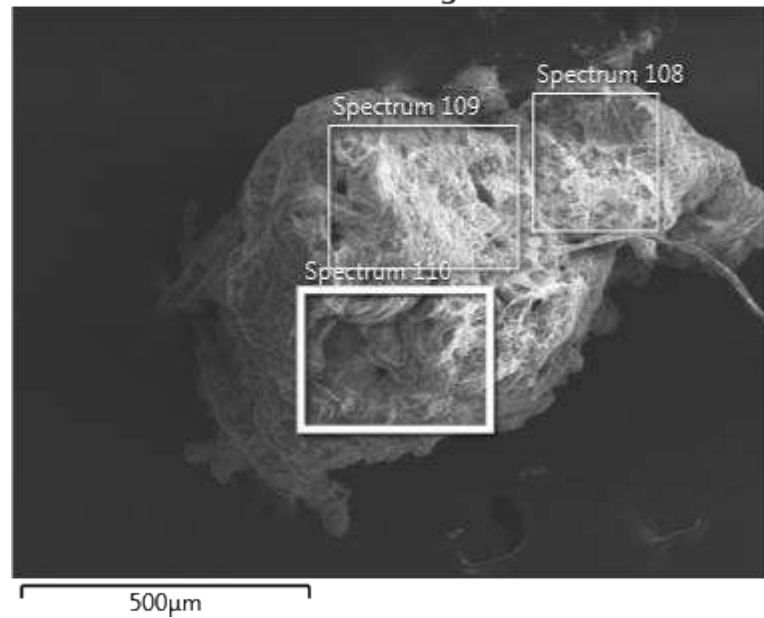

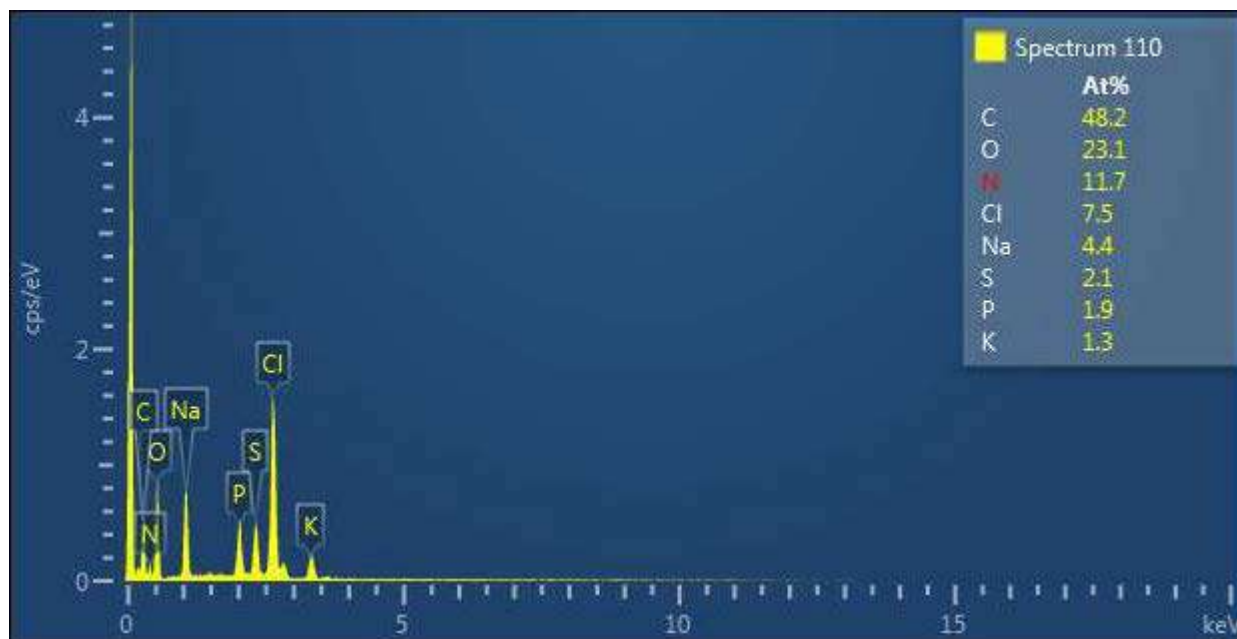

|                                 |                     |
|---------------------------------|---------------------|
| Label:                          | Spectrum 110        |
| Source:                         | Acquired            |
| Created:                        | 29/11/2019 12:26:31 |
| Livetime:                       | 60.4s               |
| Process Time:                   | 4                   |
| Accelerating Voltage:           | 15.00kV             |
| Magnification:                  | 85 x                |
| Working Distance:               | 9.8mm               |
| Specimen Tilt (degrees):        | 0.0                 |
| Elevation (degrees):            | 35.0                |
| Azimuth (degrees):              | 0.0                 |
| Number Of Channels:             | 2048                |
| Energy Range (keV):             | 20 keV              |
| Energy per Channel (eV):        | 10.0eV              |
| Detector Type Id:               | 29                  |
| Detector Type:                  | X-Max               |
| Window Type:                    | SATW                |
| Pulse Pile Up Correction:       | Succeeded           |
| Primary Detector:               | 2617                |
| Primary Detector Serial Number: | 77871-X080          |

| Element | Line Type | Apparent Concentration | k Ratio | Wt%   | Wt% Sigma | Standard Label | Factory Standard | Standard Calibration Date |
|---------|-----------|------------------------|---------|-------|-----------|----------------|------------------|---------------------------|
| C       | K series  | 0.93                   | 0.00927 | 35.02 | 1.68      | C Vit          | Yes              |                           |
| N       | K series  | 1.20                   | 0.00214 | 9.89  | 1.30      | BN             | Yes              |                           |
| O       | K series  | 2.39                   | 0.00806 | 22.36 | 0.81      | SiO2           | Yes              |                           |
| Na      | K         | 1.37                   | 0.00576 | 6.07  | 0.24      | Albite         | Yes              |                           |



|        |          |      |         |        |      |      |     |  |
|--------|----------|------|---------|--------|------|------|-----|--|
|        | series   |      |         |        |      |      |     |  |
| P      | K series | 0.99 | 0.00554 | 3.64   | 0.17 | GaP  | Yes |  |
| S      | K series | 0.73 | 0.00631 | 3.99   | 0.18 | FeS2 | Yes |  |
| Cl     | K series | 2.76 | 0.02408 | 16.06  | 0.52 | NaCl | Yes |  |
| K      | K series | 0.52 | 0.00438 | 2.98   | 0.17 | KBr  | Yes |  |
| Total: |          |      |         | 100.00 |      |      |     |  |

Electron Image 39

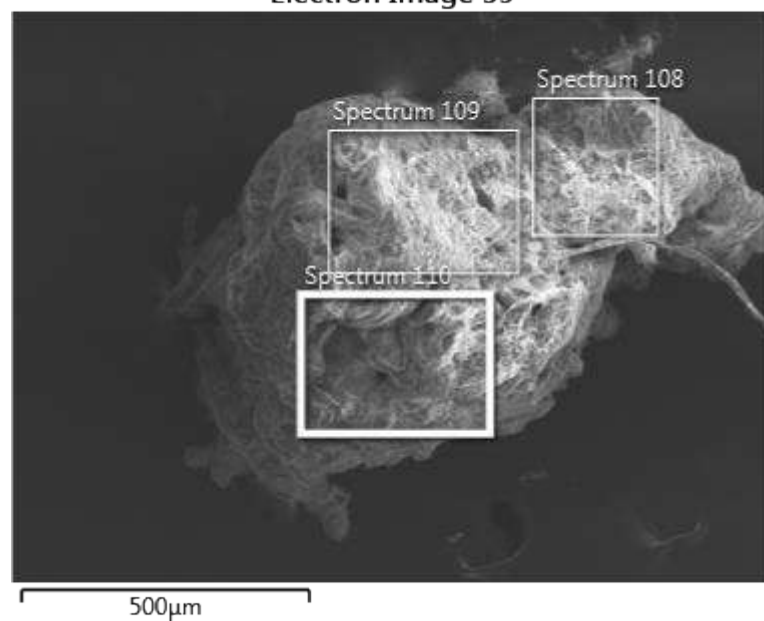

29/11/2019 12:29:30

Project 1

Glandulas salivares Mexico T2

GSM1 15 Kv

Electron Image 40

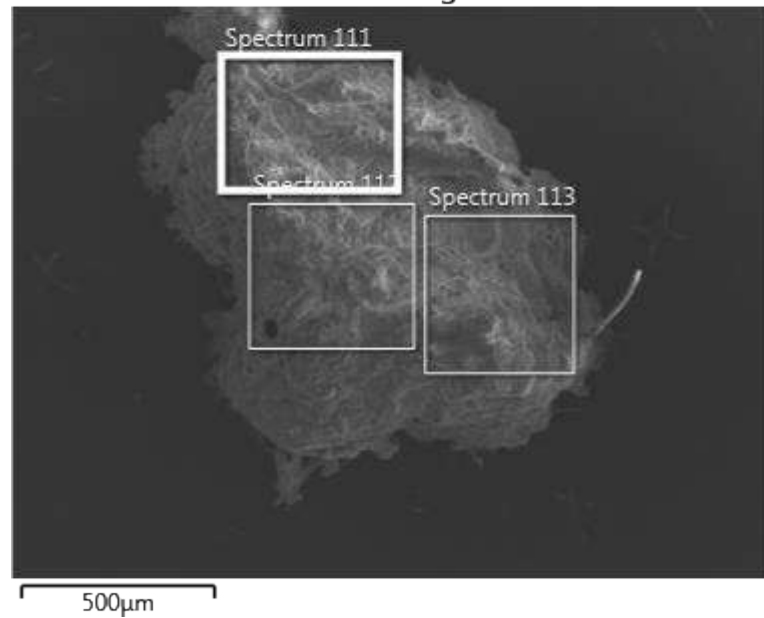

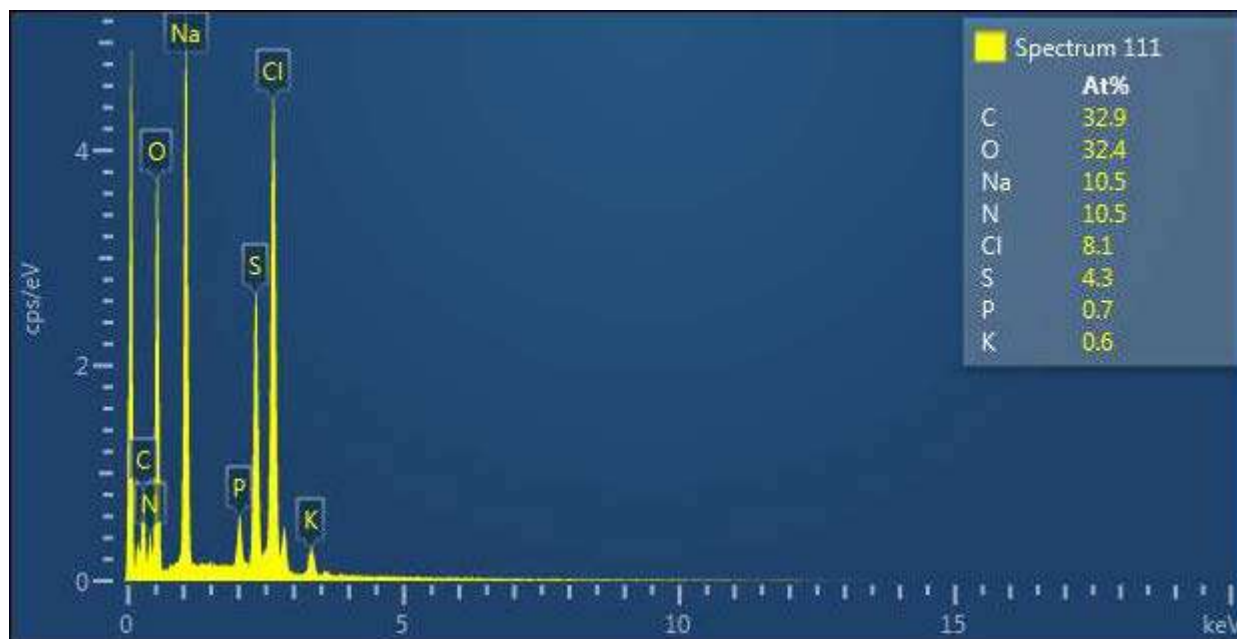

|                                 |                     |
|---------------------------------|---------------------|
| Label:                          | Spectrum 111        |
| Source:                         | Acquired            |
| Created:                        | 29/11/2019 12:29:30 |
| Livetime:                       | 60.2s               |
| Process Time:                   | 4                   |
| Accelerating Voltage:           | 15.00kV             |
| Magnification:                  | 57 x                |
| Working Distance:               | 9.8mm               |
| Specimen Tilt (degrees):        | 0.0                 |
| Elevation (degrees):            | 35.0                |
| Azimuth (degrees):              | 0.0                 |
| Number Of Channels:             | 2048                |
| Energy Range (keV):             | 20 keV              |
| Energy per Channel (eV):        | 10.0eV              |
| Detector Type Id:               | 29                  |
| Detector Type:                  | X-Max               |
| Window Type:                    | SATW                |
| Pulse Pile Up Correction:       | Succeeded           |
| Primary Detector:               | 2617                |
| Primary Detector Serial Number: | 77871-X080          |

| Element | Line Type | Apparent Concentration | k Ratio | Wt%   | Wt% Sigma | Standard Label | Factory Standard | Standard Calibration Date |
|---------|-----------|------------------------|---------|-------|-----------|----------------|------------------|---------------------------|
| C       | K series  | 1.47                   | 0.01474 | 22.30 | 1.07      | C Vit          | Yes              |                           |
| N       | K series  | 3.58                   | 0.00638 | 8.28  | 0.66      | BN             | Yes              |                           |
| O       | K series  | 11.05                  | 0.03717 | 29.26 | 0.54      | SiO2           | Yes              |                           |
| Na      | K         | 8.93                   | 0.03767 | 13.61 | 0.25      | Albite         | Yes              |                           |

|        |          |      |         |        |      |      |     |  |
|--------|----------|------|---------|--------|------|------|-----|--|
|        | series   |      |         |        |      |      |     |  |
| P      | K series | 0.96 | 0.00535 | 1.25   | 0.06 | GaP  | Yes |  |
| S      | K series | 4.11 | 0.03537 | 7.74   | 0.16 | FeS2 | Yes |  |
| Cl     | K series | 7.92 | 0.06919 | 16.24  | 0.29 | NaCl | Yes |  |
| K      | K series | 0.66 | 0.00561 | 1.33   | 0.07 | KBr  | Yes |  |
| Total: |          |      |         | 100.00 |      |      |     |  |

Electron Image 40

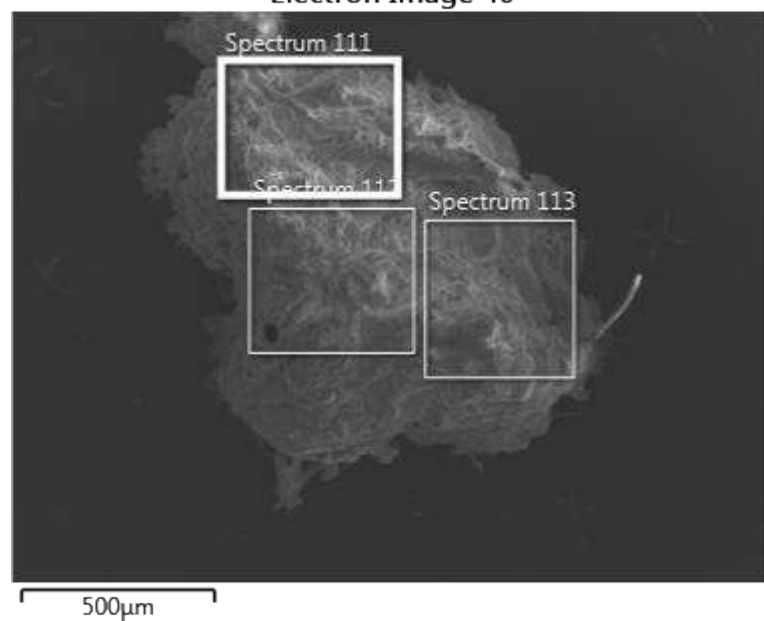

29/11/2019 12:30:38

Project 1

Glandulas salivares Mexico T2

GSM1 15 Kv

Electron Image 40

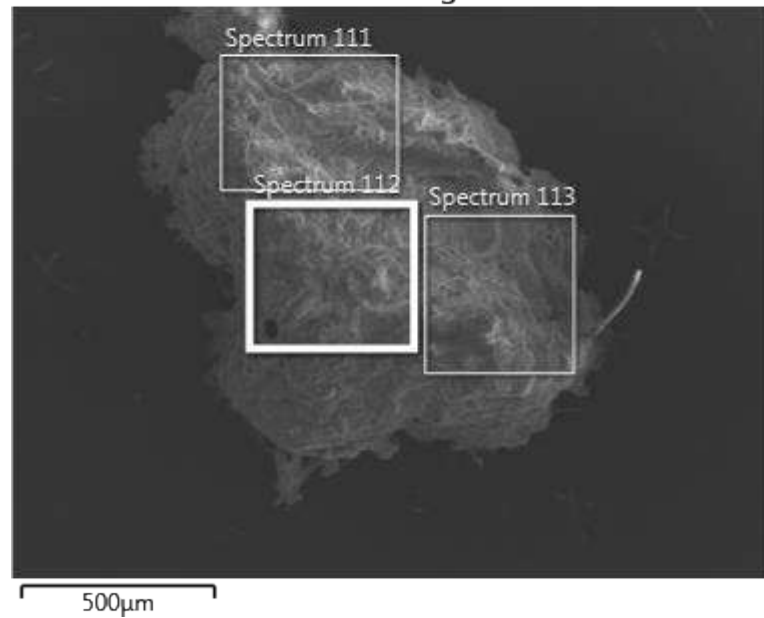

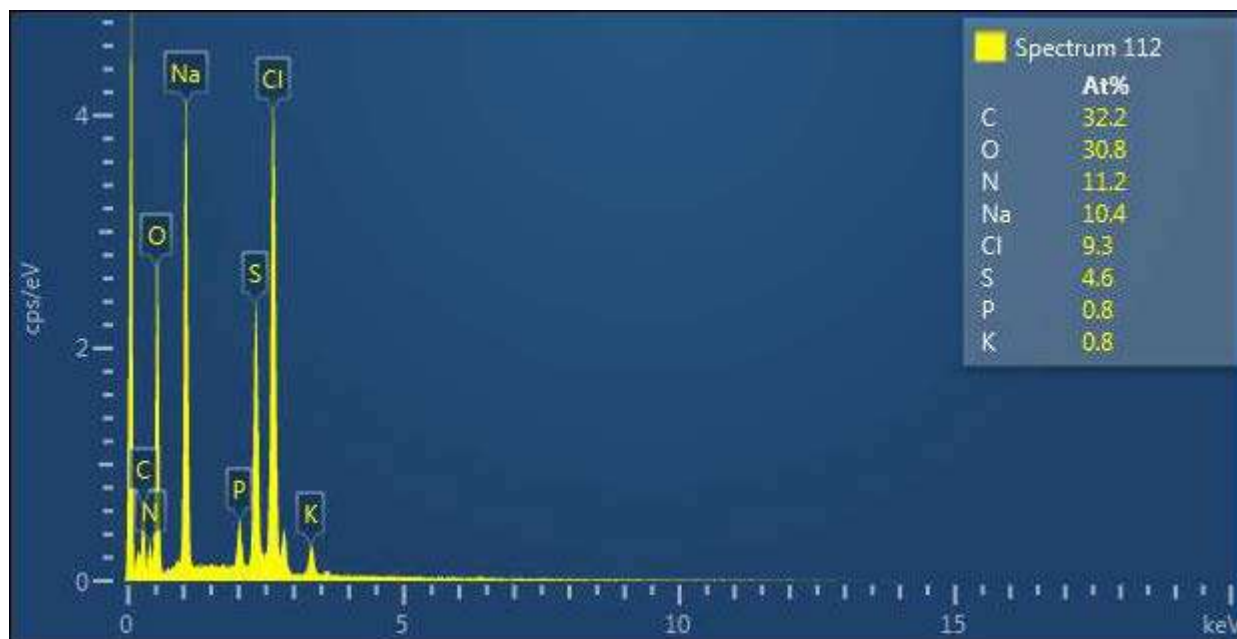

|                                 |                     |
|---------------------------------|---------------------|
| Label:                          | Spectrum 112        |
| Source:                         | Acquired            |
| Created:                        | 29/11/2019 12:30:38 |
| Livetime:                       | 60.2s               |
| Process Time:                   | 4                   |
| Accelerating Voltage:           | 15.00kV             |
| Magnification:                  | 57 x                |
| Working Distance:               | 9.8mm               |
| Specimen Tilt (degrees):        | 0.0                 |
| Elevation (degrees):            | 35.0                |
| Azimuth (degrees):              | 0.0                 |
| Number Of Channels:             | 2048                |
| Energy Range (keV):             | 20 keV              |
| Energy per Channel (eV):        | 10.0eV              |
| Detector Type Id:               | 29                  |
| Detector Type:                  | X-Max               |
| Window Type:                    | SATW                |
| Pulse Pile Up Correction:       | Succeeded           |
| Primary Detector:               | 2617                |
| Primary Detector Serial Number: | 77871-X080          |

| Element | Line Type | Apparent Concentration | k Ratio | Wt%   | Wt% Sigma | Standard Label | Factory Standard | Standard Calibration Date |
|---------|-----------|------------------------|---------|-------|-----------|----------------|------------------|---------------------------|
| C       | K series  | 1.07                   | 0.01065 | 21.43 | 1.22      | C Vit          | Yes              |                           |
| N       | K series  | 2.93                   | 0.00523 | 8.70  | 0.74      | BN             | Yes              |                           |
| O       | K series  | 8.01                   | 0.02695 | 27.27 | 0.57      | SiO2           | Yes              |                           |
| Na      | K         | 7.09                   | 0.02993 | 13.28 | 0.28      | Albite         | Yes              |                           |

|        |          |      |         |        |      |      |     |  |
|--------|----------|------|---------|--------|------|------|-----|--|
|        | series   |      |         |        |      |      |     |  |
| P      | K series | 0.84 | 0.00469 | 1.34   | 0.07 | GaP  | Yes |  |
| S      | K series | 3.51 | 0.03020 | 8.13   | 0.19 | FeS2 | Yes |  |
| Cl     | K series | 7.18 | 0.06271 | 18.20  | 0.36 | NaCl | Yes |  |
| K      | K series | 0.66 | 0.00560 | 1.64   | 0.08 | KBr  | Yes |  |
| Total: |          |      |         | 100.00 |      |      |     |  |

Electron Image 40

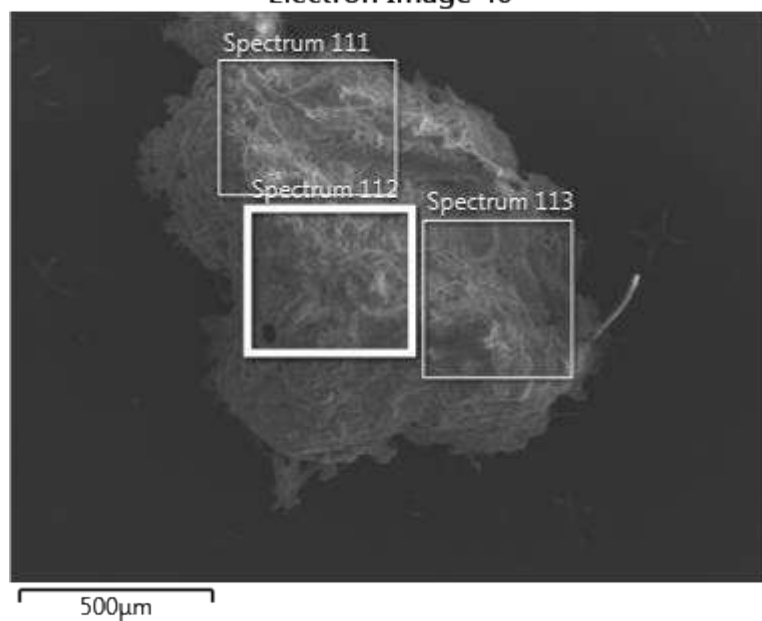

29/11/2019 12:31:46

Project 1

Glandulas salivares Mexico T2

GSM1 15 Kv

Electron Image 40

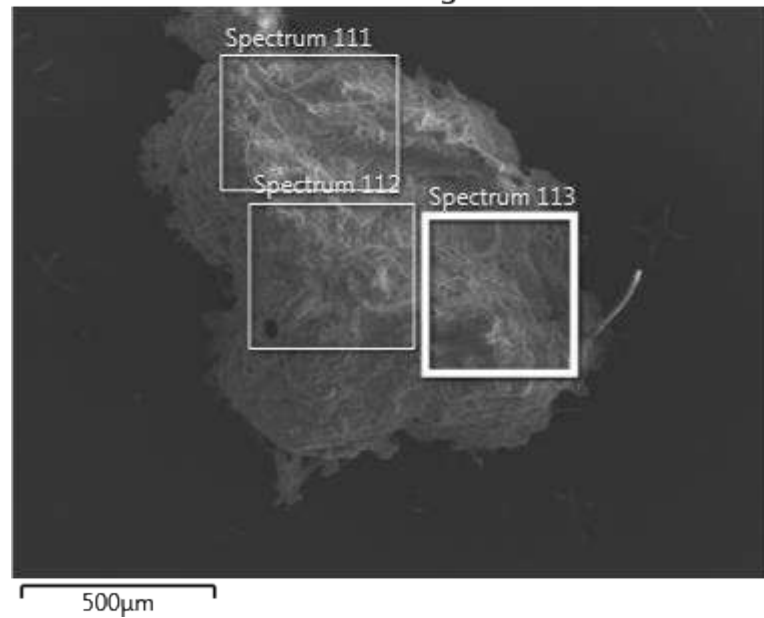



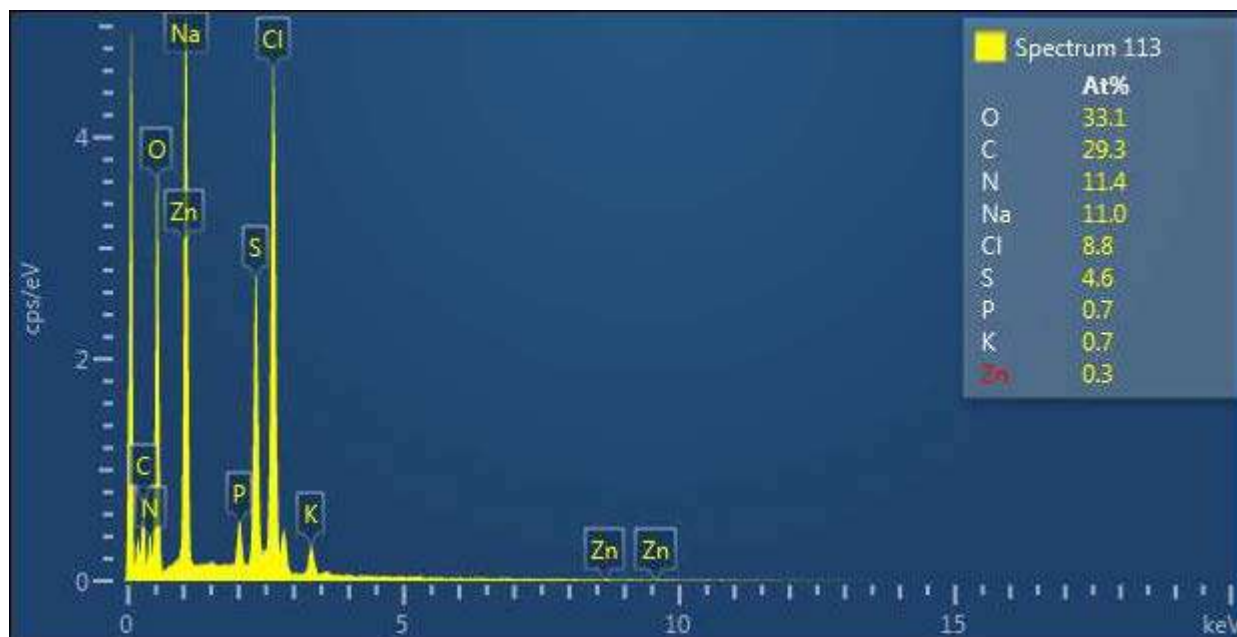

|                                 |                     |
|---------------------------------|---------------------|
| Label:                          | Spectrum 113        |
| Source:                         | Acquired            |
| Created:                        | 29/11/2019 12:31:46 |
| Livetime:                       | 60.3s               |
| Process Time:                   | 4                   |
| Accelerating Voltage:           | 15.00kV             |
| Magnification:                  | 57 x                |
| Working Distance:               | 9.8mm               |
| Specimen Tilt (degrees):        | 0.0                 |
| Elevation (degrees):            | 35.0                |
| Azimuth (degrees):              | 0.0                 |
| Number Of Channels:             | 2048                |
| Energy Range (keV):             | 20 keV              |
| Energy per Channel (eV):        | 10.0eV              |
| Detector Type Id:               | 29                  |
| Detector Type:                  | X-Max               |
| Window Type:                    | SATW                |
| Pulse Pile Up Correction:       | Succeeded           |
| Primary Detector:               | 2617                |
| Primary Detector Serial Number: | 77871-X080          |

| Element | Line Type | Apparent Concentration | k Ratio | Wt%   | Wt% Sigma | Standard Label | Factory Standard | Standard Calibration Date |
|---------|-----------|------------------------|---------|-------|-----------|----------------|------------------|---------------------------|
| C       | K series  | 1.16                   | 0.01160 | 19.26 | 1.12      | C Vit          | Yes              |                           |
| N       | K series  | 3.75                   | 0.00668 | 8.79  | 0.65      | BN             | Yes              |                           |
| O       | K series  | 10.62                  | 0.03575 | 29.06 | 0.55      | SiO2           | Yes              |                           |
| Na      | K         | 8.61                   | 0.03635 | 13.89 | 0.29      | Albite         | Yes              |                           |

|        |          |      |         |        |      |      |     |  |
|--------|----------|------|---------|--------|------|------|-----|--|
|        | series   |      |         |        |      |      |     |  |
| P      | K series | 0.88 | 0.00495 | 1.21   | 0.06 | GaP  | Yes |  |
| S      | K series | 4.09 | 0.03525 | 8.06   | 0.17 | FeS2 | Yes |  |
| Cl     | K series | 8.00 | 0.06994 | 17.16  | 0.32 | NaCl | Yes |  |
| K      | K series | 0.67 | 0.00568 | 1.40   | 0.07 | KBr  | Yes |  |
| Zn     | L series | 0.32 | 0.00317 | 1.18   | 0.37 | Zn   | Yes |  |
| Total: |          |      |         | 100.00 |      |      |     |  |

Electron Image 40

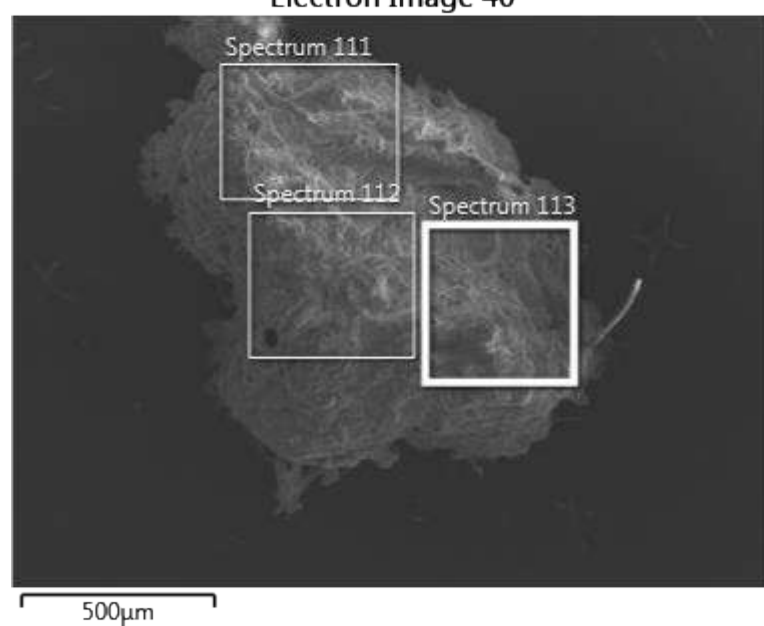

29/11/2019 12:33:38

Project 1

Glandulas salivares Mexico T2

GSM2 15 Kv

Electron Image 41

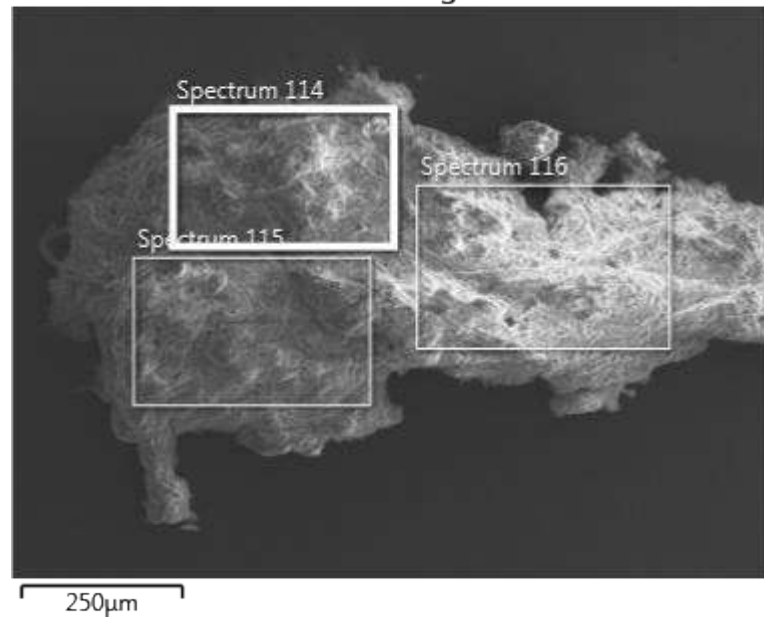

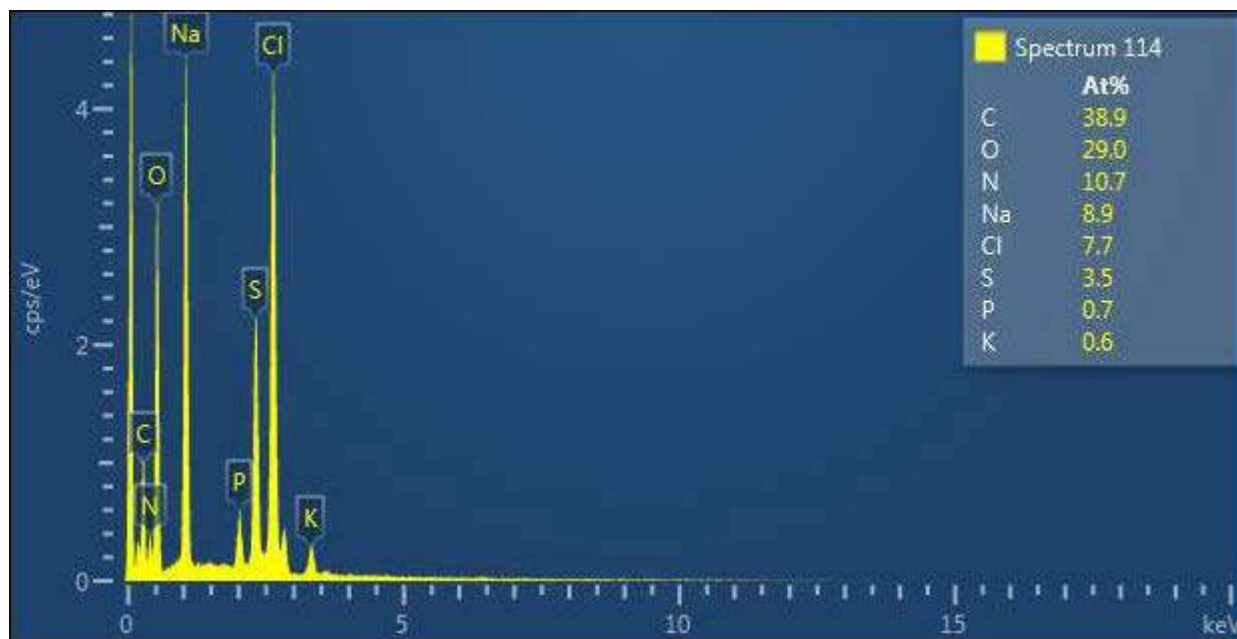

|                                 |                     |
|---------------------------------|---------------------|
| Label:                          | Spectrum 114        |
| Source:                         | Acquired            |
| Created:                        | 29/11/2019 12:33:38 |
| Livetime:                       | 60.1s               |
| Process Time:                   | 4                   |
| Accelerating Voltage:           | 15.00kV             |
| Magnification:                  | 95 x                |
| Working Distance:               | 9.8mm               |
| Specimen Tilt (degrees):        | 0.0                 |
| Elevation (degrees):            | 35.0                |
| Azimuth (degrees):              | 0.0                 |
| Number Of Channels:             | 2048                |
| Energy Range (keV):             | 20 keV              |
| Energy per Channel (eV):        | 10.0eV              |
| Detector Type Id:               | 29                  |
| Detector Type:                  | X-Max               |
| Window Type:                    | SATW                |
| Pulse Pile Up Correction:       | Succeeded           |
| Primary Detector:               | 2617                |
| Primary Detector Serial Number: | 77871-X080          |

| Element | Line Type | Apparent Concentration | k Ratio | Wt%   | Wt% Sigma | Standard Label | Factory Standard | Standard Calibration Date |
|---------|-----------|------------------------|---------|-------|-----------|----------------|------------------|---------------------------|
| C       | K series  | 1.84                   | 0.01838 | 27.22 | 1.04      | C Vit          | Yes              |                           |
| N       | K series  | 3.41                   | 0.00606 | 8.73  | 0.70      | BN             | Yes              |                           |
| O       | K series  | 9.26                   | 0.03116 | 27.08 | 0.52      | SiO2           | Yes              |                           |
| Na      | K         | 7.48                   | 0.03157 | 11.90 | 0.23      | Albite         | Yes              |                           |

|        |          |      |         |        |      |      |     |  |
|--------|----------|------|---------|--------|------|------|-----|--|
|        | series   |      |         |        |      |      |     |  |
| P      | K series | 0.97 | 0.00544 | 1.32   | 0.06 | GaP  | Yes |  |
| S      | K series | 3.34 | 0.02881 | 6.56   | 0.15 | FeS2 | Yes |  |
| Cl     | K series | 7.48 | 0.06533 | 15.91  | 0.30 | NaCl | Yes |  |
| K      | K series | 0.61 | 0.00518 | 1.27   | 0.07 | KBr  | Yes |  |
| Total: |          |      |         | 100.00 |      |      |     |  |

Electron Image 41

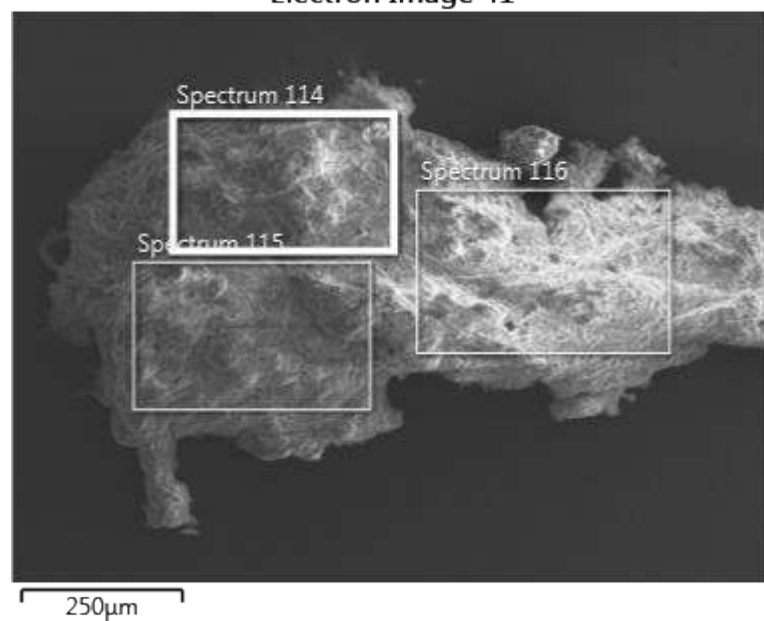

29/11/2019 12:34:45

Project 1

Glandulas salivares Mexico T2

GSM2 15 Kv

Electron Image 41

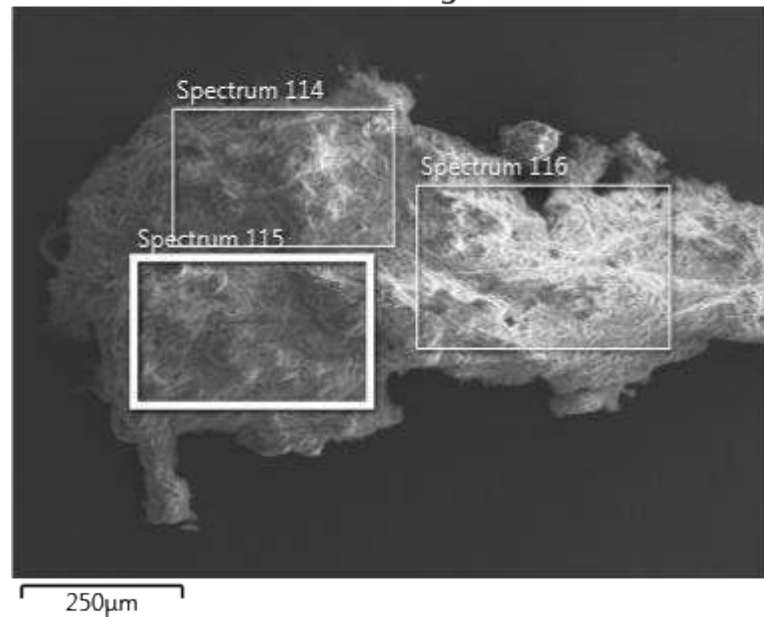

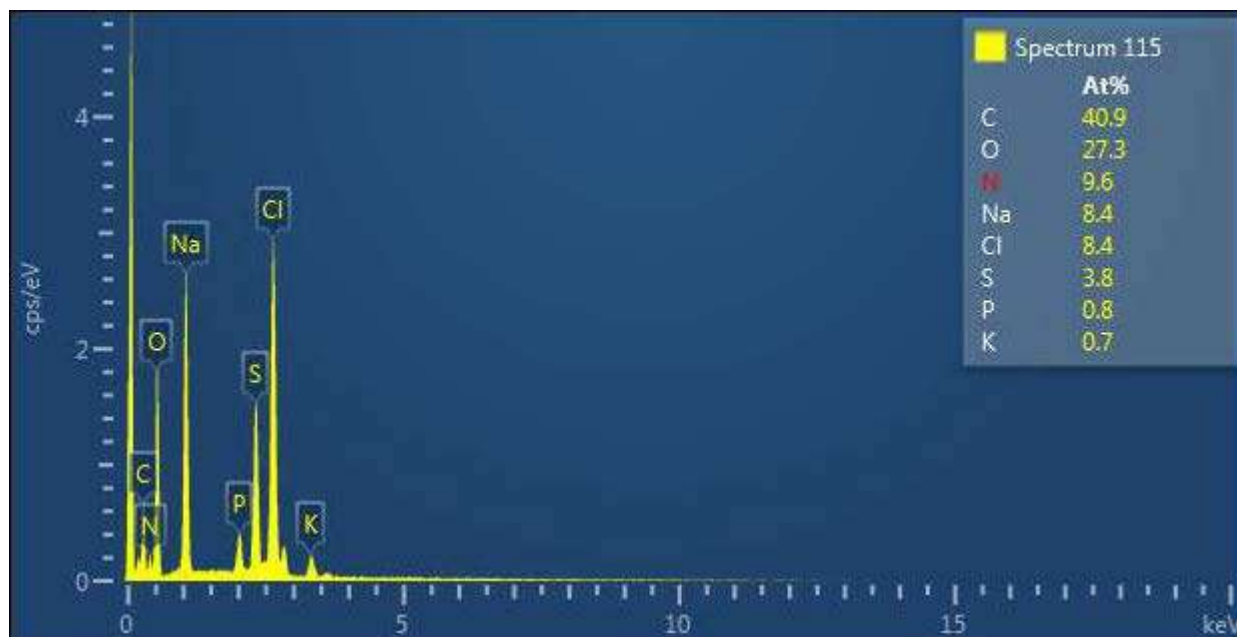

|                                 |                     |
|---------------------------------|---------------------|
| Label:                          | Spectrum 115        |
| Source:                         | Acquired            |
| Created:                        | 29/11/2019 12:34:45 |
| Livetime:                       | 60.1s               |
| Process Time:                   | 4                   |
| Accelerating Voltage:           | 15.00kV             |
| Magnification:                  | 95 x                |
| Working Distance:               | 9.8mm               |
| Specimen Tilt (degrees):        | 0.0                 |
| Elevation (degrees):            | 35.0                |
| Azimuth (degrees):              | 0.0                 |
| Number Of Channels:             | 2048                |
| Energy Range (keV):             | 20 keV              |
| Energy per Channel (eV):        | 10.0eV              |
| Detector Type Id:               | 29                  |
| Detector Type:                  | X-Max               |
| Window Type:                    | SATW                |
| Pulse Pile Up Correction:       | Succeeded           |
| Primary Detector:               | 2617                |
| Primary Detector Serial Number: | 77871-X080          |

| Element | Line Type | Apparent Concentration | k Ratio | Wt%   | Wt% Sigma | Standard Label | Factory Standard | Standard Calibration Date |
|---------|-----------|------------------------|---------|-------|-----------|----------------|------------------|---------------------------|
| C       | K series  | 1.15                   | 0.01153 | 28.41 | 1.34      | C Vit          | Yes              |                           |
| N       | K series  | 1.81                   | 0.00322 | 7.76  | 0.90      | BN             | Yes              |                           |
| O       | K series  | 5.33                   | 0.01793 | 25.25 | 0.64      | SiO2           | Yes              |                           |
| Na      | K         | 4.51                   | 0.01905 | 11.20 | 0.28      | Albite         | Yes              |                           |

|        |          |      |         |        |      |                  |     |  |
|--------|----------|------|---------|--------|------|------------------|-----|--|
|        | series   |      |         |        |      |                  |     |  |
| P      | K series | 0.71 | 0.00398 | 1.50   | 0.08 | GaP              | Yes |  |
| S      | K series | 2.32 | 0.01995 | 7.12   | 0.20 | FeS <sub>2</sub> | Yes |  |
| Cl     | K series | 5.13 | 0.04481 | 17.18  | 0.41 | NaCl             | Yes |  |
| K      | K series | 0.48 | 0.00404 | 1.57   | 0.10 | KBr              | Yes |  |
| Total: |          |      |         | 100.00 |      |                  |     |  |

Electron Image 41

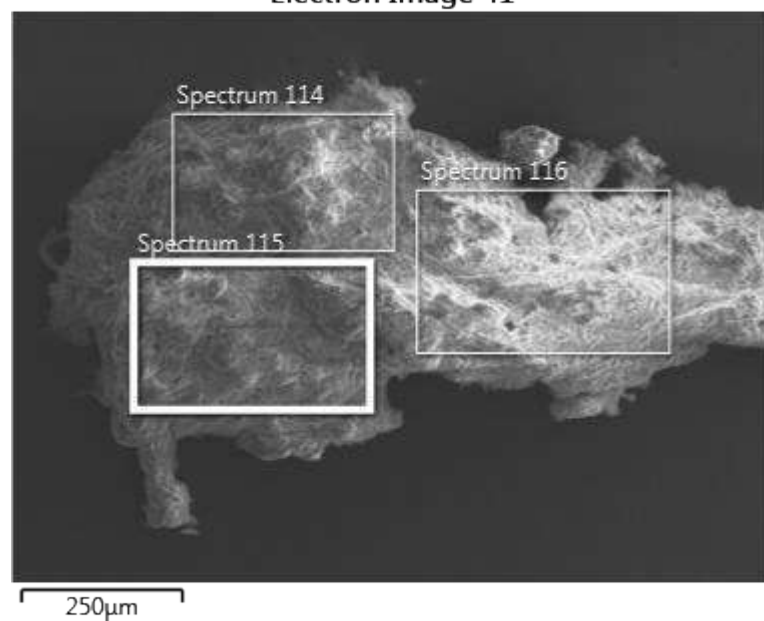



29/11/2019 12:35:52

Project 1

Glandulas salivares Mexico T2

GSM2 15 Kv

Electron Image 41

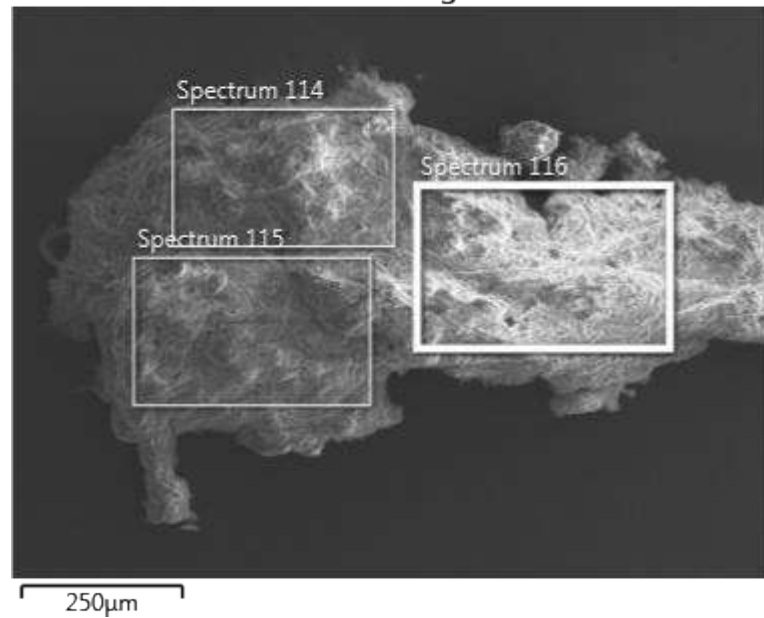

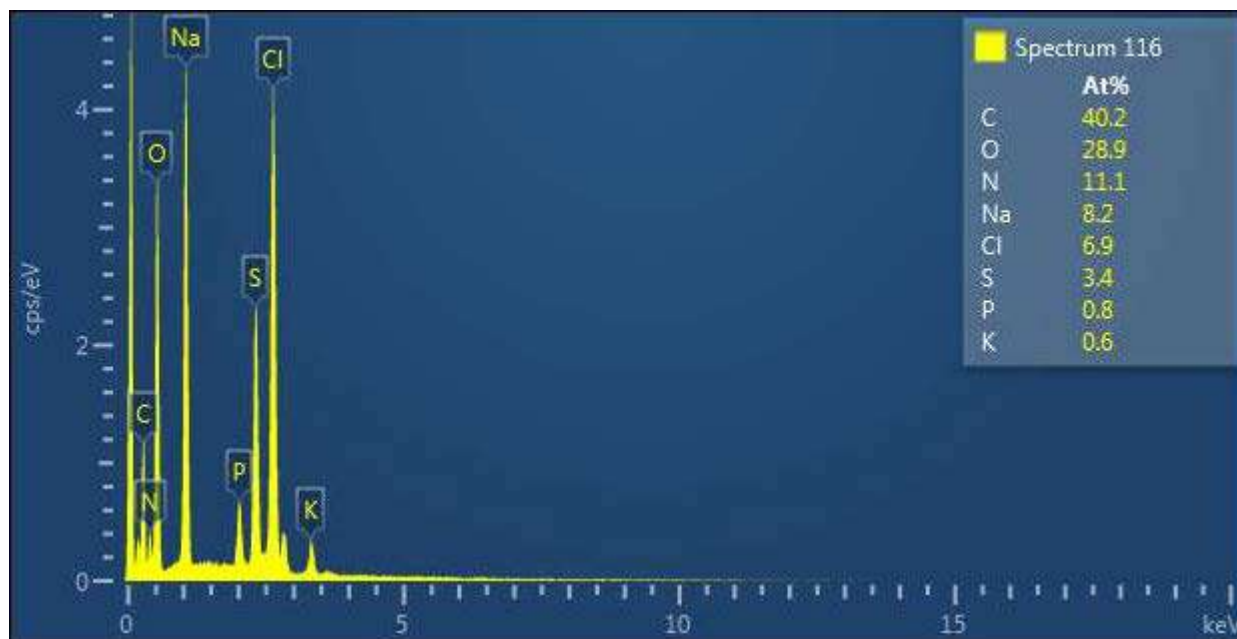

|                                 |                     |
|---------------------------------|---------------------|
| Label:                          | Spectrum 116        |
| Source:                         | Acquired            |
| Created:                        | 29/11/2019 12:35:52 |
| Livetime:                       | 60.2s               |
| Process Time:                   | 4                   |
| Accelerating Voltage:           | 15.00kV             |
| Magnification:                  | 95 x                |
| Working Distance:               | 9.8mm               |
| Specimen Tilt (degrees):        | 0.0                 |
| Elevation (degrees):            | 35.0                |
| Azimuth (degrees):              | 0.0                 |
| Number Of Channels:             | 2048                |
| Energy Range (keV):             | 20 keV              |
| Energy per Channel (eV):        | 10.0eV              |
| Detector Type Id:               | 29                  |
| Detector Type:                  | X-Max               |
| Window Type:                    | SATW                |
| Pulse Pile Up Correction:       | Succeeded           |
| Primary Detector:               | 2617                |
| Primary Detector Serial Number: | 77871-X080          |

| Element | Line Type | Apparent Concentration | k Ratio | Wt%   | Wt% Sigma | Standard Label | Factory Standard | Standard Calibration Date |
|---------|-----------|------------------------|---------|-------|-----------|----------------|------------------|---------------------------|
| C       | K series  | 2.19                   | 0.02190 | 28.55 | 0.95      | C Vit          | Yes              |                           |
| N       | K series  | 3.84                   | 0.00684 | 9.17  | 0.67      | BN             | Yes              |                           |
| O       | K series  | 9.96                   | 0.03352 | 27.32 | 0.50      | SiO2           | Yes              |                           |
| Na      | K         | 7.47                   | 0.03151 | 11.12 | 0.21      | Albite         | Yes              |                           |

|        |          |      |         |        |      |      |     |  |
|--------|----------|------|---------|--------|------|------|-----|--|
|        | series   |      |         |        |      |      |     |  |
| P      | K series | 1.18 | 0.00662 | 1.49   | 0.06 | GaP  | Yes |  |
| S      | K series | 3.54 | 0.03046 | 6.48   | 0.14 | FeS2 | Yes |  |
| Cl     | K series | 7.32 | 0.06394 | 14.52  | 0.26 | NaCl | Yes |  |
| K      | K series | 0.69 | 0.00587 | 1.34   | 0.07 | KBr  | Yes |  |
| Total: |          |      |         | 100.00 |      |      |     |  |

Electron Image 41

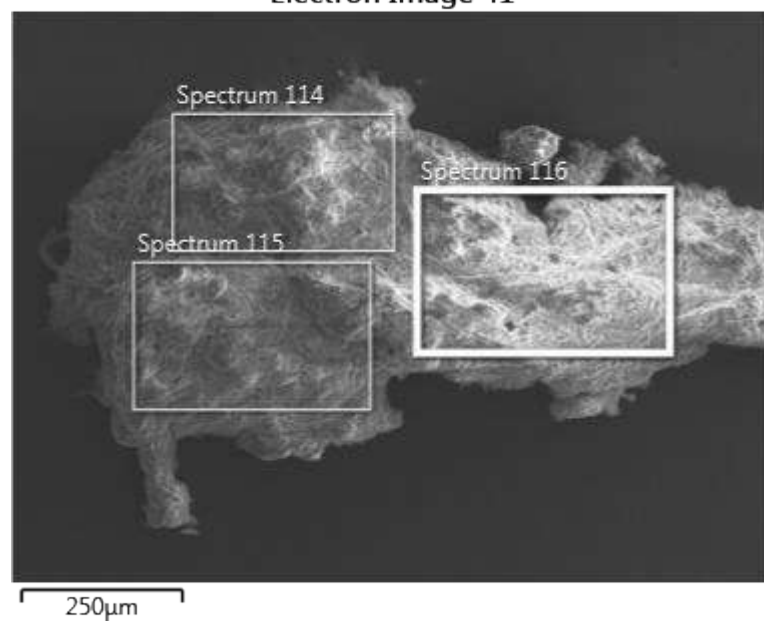

29/11/2019 12:38:09

Project 1

Glandulas salivares Mexico T3

GSM3 15 Kv

Electron Image 42

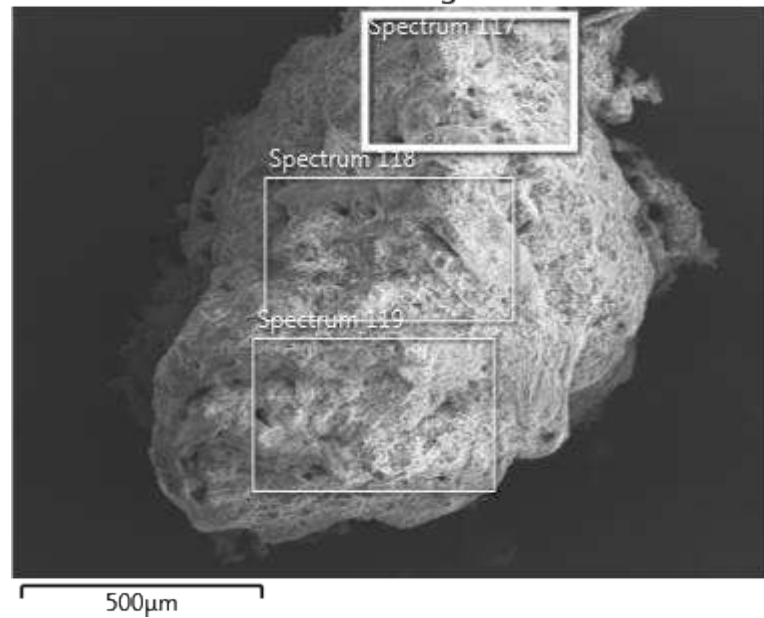

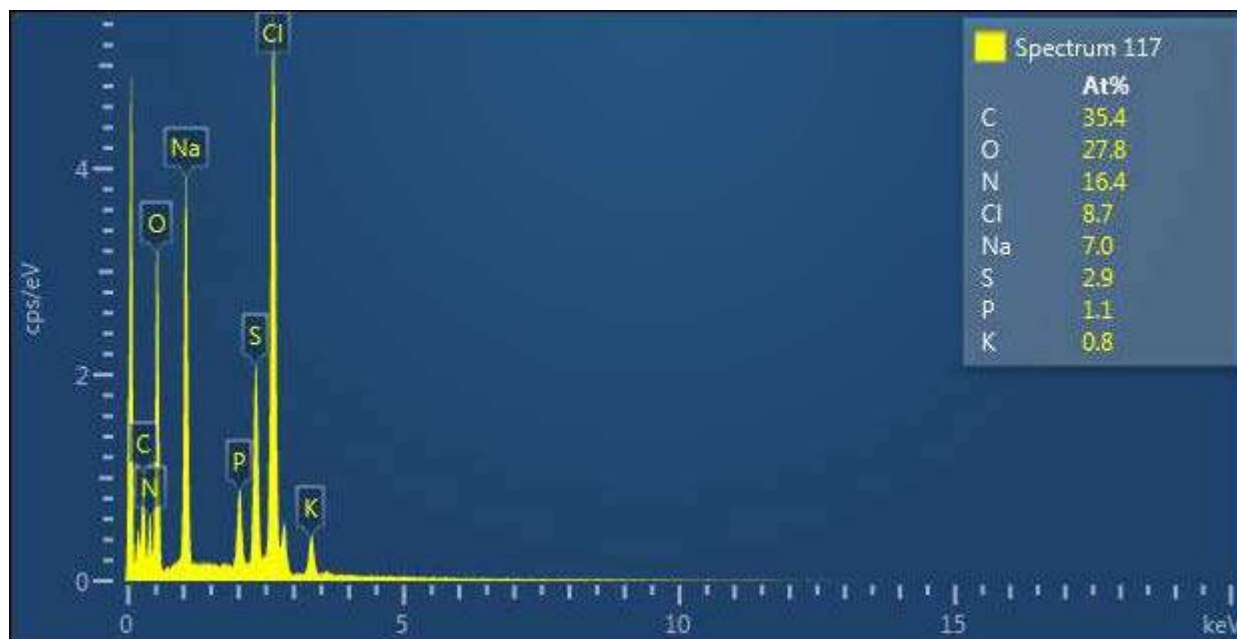

|                                 |                     |
|---------------------------------|---------------------|
| Label:                          | Spectrum 117        |
| Source:                         | Acquired            |
| Created:                        | 29/11/2019 12:38:09 |
| Livetime:                       | 60.0s               |
| Process Time:                   | 4                   |
| Accelerating Voltage:           | 15.00kV             |
| Magnification:                  | 71 x                |
| Working Distance:               | 9.8mm               |
| Specimen Tilt (degrees):        | 0.0                 |
| Elevation (degrees):            | 35.0                |
| Azimuth (degrees):              | 0.0                 |
| Number Of Channels:             | 2048                |
| Energy Range (keV):             | 20 keV              |
| Energy per Channel (eV):        | 10.0eV              |
| Detector Type Id:               | 29                  |
| Detector Type:                  | X-Max               |
| Window Type:                    | SATW                |
| Pulse Pile Up Correction:       | Succeeded           |
| Primary Detector:               | 2617                |
| Primary Detector Serial Number: | 77871-X080          |

| Element | Line Type | Apparent Concentration | k Ratio | Wt%   | Wt% Sigma | Standard Label | Factory Standard | Standard Calibration Date |
|---------|-----------|------------------------|---------|-------|-----------|----------------|------------------|---------------------------|
| C       | K series  | 1.85                   | 0.01846 | 24.69 | 1.02      | C Vit          | Yes              |                           |
| N       | K series  | 6.02                   | 0.01072 | 13.31 | 0.69      | BN             | Yes              |                           |
| O       | K series  | 9.25                   | 0.03112 | 25.76 | 0.49      | SiO2           | Yes              |                           |
| Na      | K         | 6.61                   | 0.02788 | 9.40  | 0.19      | Albite         | Yes              |                           |

|        |          |      |         |        |      |      |     |  |
|--------|----------|------|---------|--------|------|------|-----|--|
|        | series   |      |         |        |      |      |     |  |
| P      | K series | 1.62 | 0.00905 | 1.91   | 0.07 | GaP  | Yes |  |
| S      | K series | 3.12 | 0.02688 | 5.37   | 0.12 | FeS2 | Yes |  |
| Cl     | K series | 9.57 | 0.08366 | 17.80  | 0.31 | NaCl | Yes |  |
| K      | K series | 0.95 | 0.00809 | 1.76   | 0.07 | KBr  | Yes |  |
| Total: |          |      |         | 100.00 |      |      |     |  |

Electron Image 42

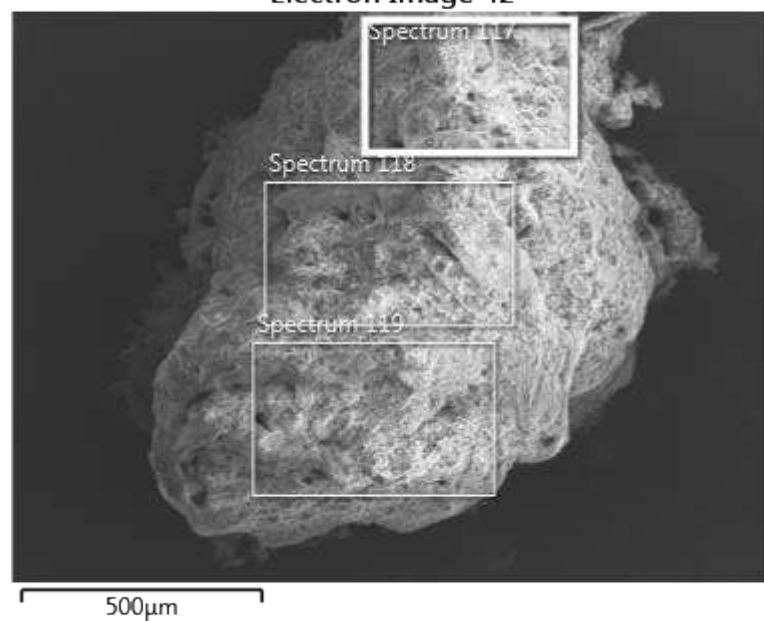

29/11/2019 12:39:17

Project 1

Glandulas salivares Mexico T3

GSM3 15 Kv

Electron Image 42

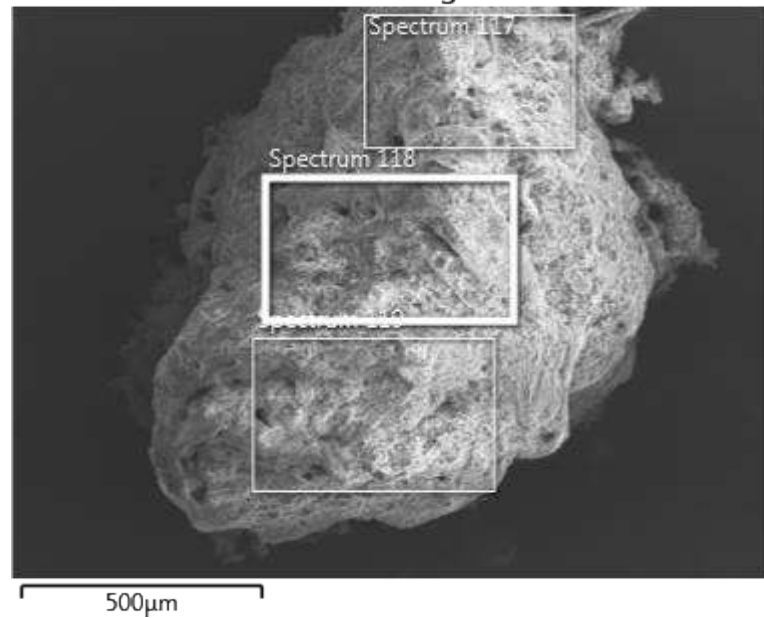

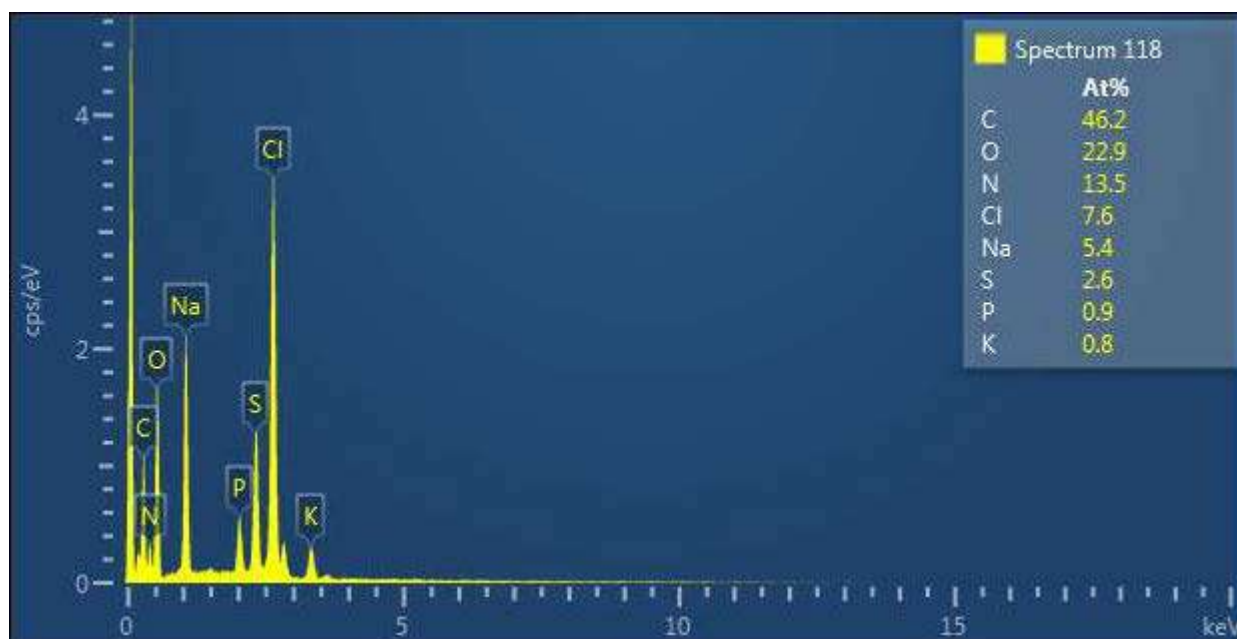

|                                 |                     |
|---------------------------------|---------------------|
| Label:                          | Spectrum 118        |
| Source:                         | Acquired            |
| Created:                        | 29/11/2019 12:39:17 |
| Livetime:                       | 60.0s               |
| Process Time:                   | 4                   |
| Accelerating Voltage:           | 15.00kV             |
| Magnification:                  | 71 x                |
| Working Distance:               | 9.8mm               |
| Specimen Tilt (degrees):        | 0.0                 |
| Elevation (degrees):            | 35.0                |
| Azimuth (degrees):              | 0.0                 |
| Number Of Channels:             | 2048                |
| Energy Range (keV):             | 20 keV              |
| Energy per Channel (eV):        | 10.0eV              |
| Detector Type Id:               | 29                  |
| Detector Type:                  | X-Max               |
| Window Type:                    | SATW                |
| Pulse Pile Up Correction:       | Succeeded           |
| Primary Detector:               | 2617                |
| Primary Detector Serial Number: | 77871-X080          |

| Element | Line Type | Apparent Concentration | k Ratio | Wt%   | Wt% Sigma | Standard Label | Factory Standard | Standard Calibration Date |
|---------|-----------|------------------------|---------|-------|-----------|----------------|------------------|---------------------------|
| C       | K series  | 1.86                   | 0.01859 | 33.62 | 1.16      | C Vit          | Yes              |                           |
| N       | K series  | 3.08                   | 0.00548 | 11.48 | 0.90      | BN             | Yes              |                           |
| O       | K series  | 5.07                   | 0.01705 | 22.23 | 0.56      | SiO2           | Yes              |                           |
| Na      | K         | 3.60                   | 0.01518 | 7.52  | 0.19      | Albite         | Yes              |                           |



|        |          |      |         |        |      |      |     |  |
|--------|----------|------|---------|--------|------|------|-----|--|
|        | series   |      |         |        |      |      |     |  |
| P      | K series | 1.01 | 0.00564 | 1.76   | 0.08 | GaP  | Yes |  |
| S      | K series | 1.97 | 0.01698 | 5.02   | 0.15 | FeS2 | Yes |  |
| Cl     | K series | 5.97 | 0.05218 | 16.43  | 0.36 | NaCl | Yes |  |
| K      | K series | 0.71 | 0.00605 | 1.94   | 0.09 | KBr  | Yes |  |
| Total: |          |      |         | 100.00 |      |      |     |  |

Electron Image 42

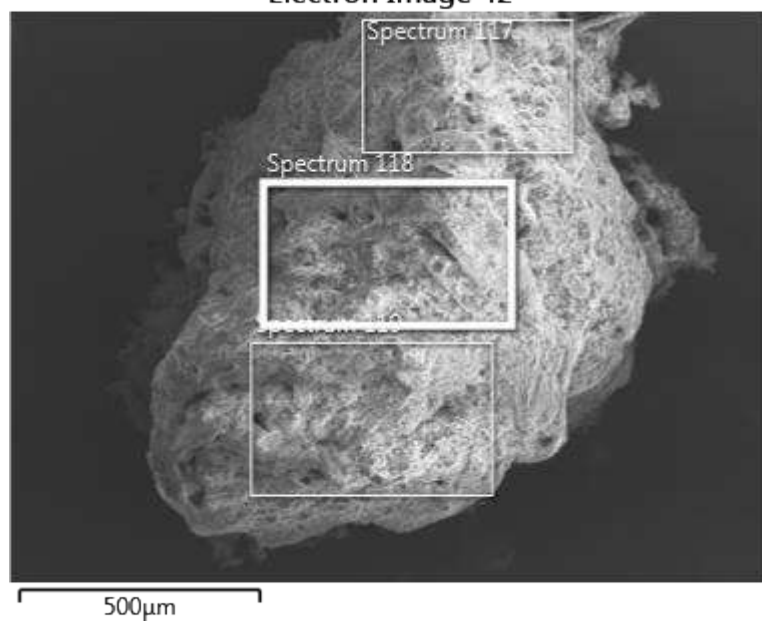

29/11/2019 12:40:23

Project 1

Glandulas salivares Mexico T3

GSM3 15 Kv

Electron Image 42

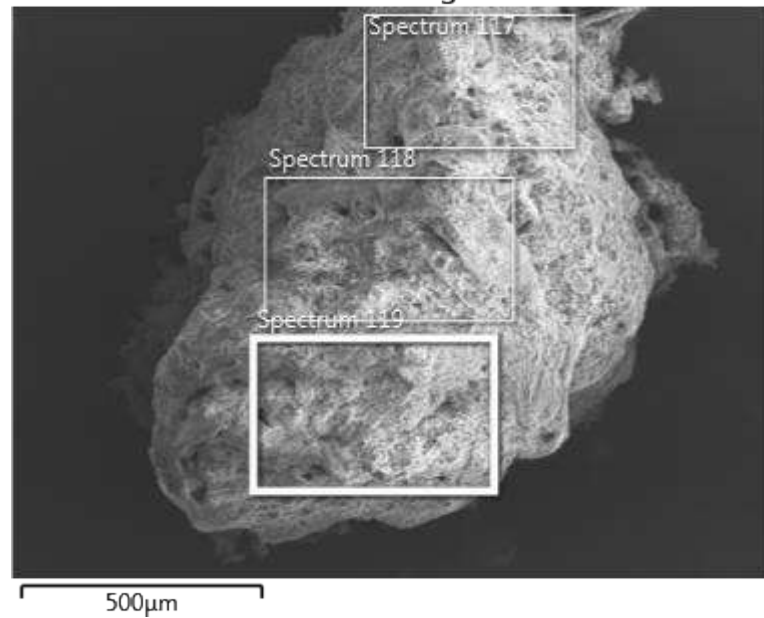

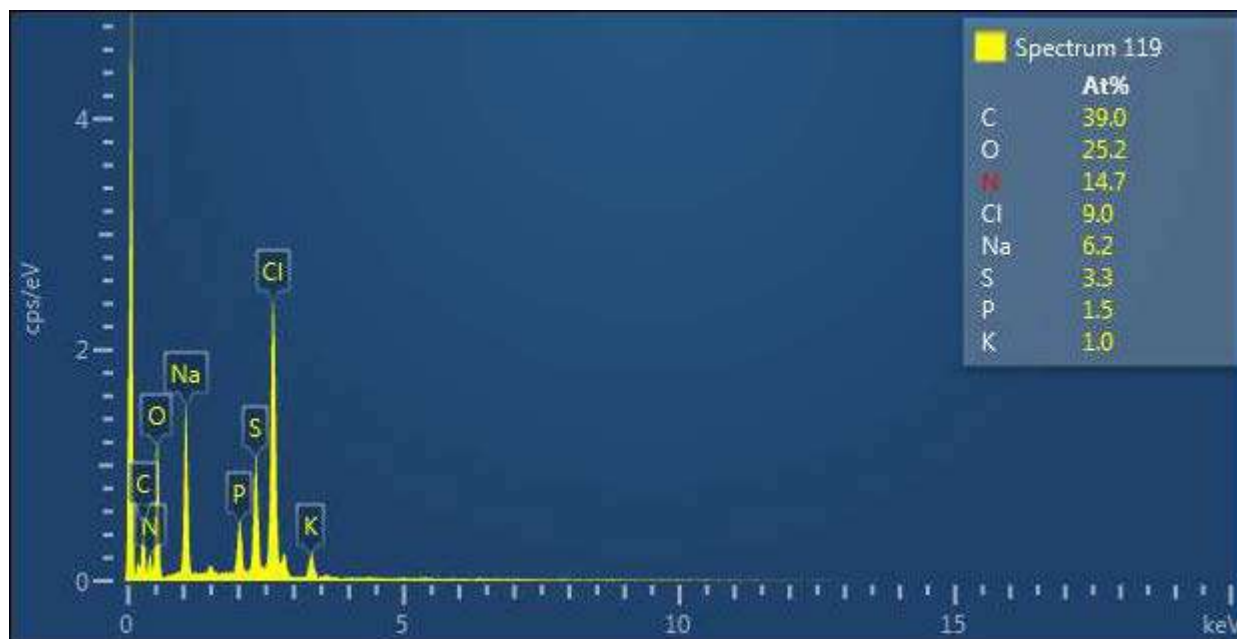

|                                 |                     |
|---------------------------------|---------------------|
| Label:                          | Spectrum 119        |
| Source:                         | Acquired            |
| Created:                        | 29/11/2019 12:40:23 |
| Livetime:                       | 60.4s               |
| Process Time:                   | 4                   |
| Accelerating Voltage:           | 15.00kV             |
| Magnification:                  | 71 x                |
| Working Distance:               | 9.8mm               |
| Specimen Tilt (degrees):        | 0.0                 |
| Elevation (degrees):            | 35.0                |
| Azimuth (degrees):              | 0.0                 |
| Number Of Channels:             | 2048                |
| Energy Range (keV):             | 20 keV              |
| Energy per Channel (eV):        | 10.0eV              |
| Detector Type Id:               | 29                  |
| Detector Type:                  | X-Max               |
| Window Type:                    | SATW                |
| Pulse Pile Up Correction:       | Succeeded           |
| Primary Detector:               | 2617                |
| Primary Detector Serial Number: | 77871-X080          |

| Element | Line Type | Apparent Concentration | k Ratio | Wt%   | Wt% Sigma | Standard Label | Factory Standard | Standard Calibration Date |
|---------|-----------|------------------------|---------|-------|-----------|----------------|------------------|---------------------------|
| C       | K series  | 0.82                   | 0.00825 | 27.05 | 1.62      | C Vit          | Yes              |                           |
| N       | K series  | 2.11                   | 0.00375 | 11.89 | 1.09      | BN             | Yes              |                           |
| O       | K series  | 3.44                   | 0.01158 | 23.27 | 0.73      | SiO2           | Yes              |                           |
| Na      | K         | 2.51                   | 0.01060 | 8.28  | 0.26      | Albite         | Yes              |                           |

|        |          |      |         |        |      |      |     |  |
|--------|----------|------|---------|--------|------|------|-----|--|
|        | series   |      |         |        |      |      |     |  |
| P      | K series | 0.98 | 0.00547 | 2.68   | 0.13 | GaP  | Yes |  |
| S      | K series | 1.53 | 0.01317 | 6.16   | 0.21 | FeS2 | Yes |  |
| Cl     | K series | 4.21 | 0.03675 | 18.37  | 0.51 | NaCl | Yes |  |
| K      | K series | 0.53 | 0.00450 | 2.29   | 0.13 | KBr  | Yes |  |
| Total: |          |      |         | 100.00 |      |      |     |  |

Electron Image 42

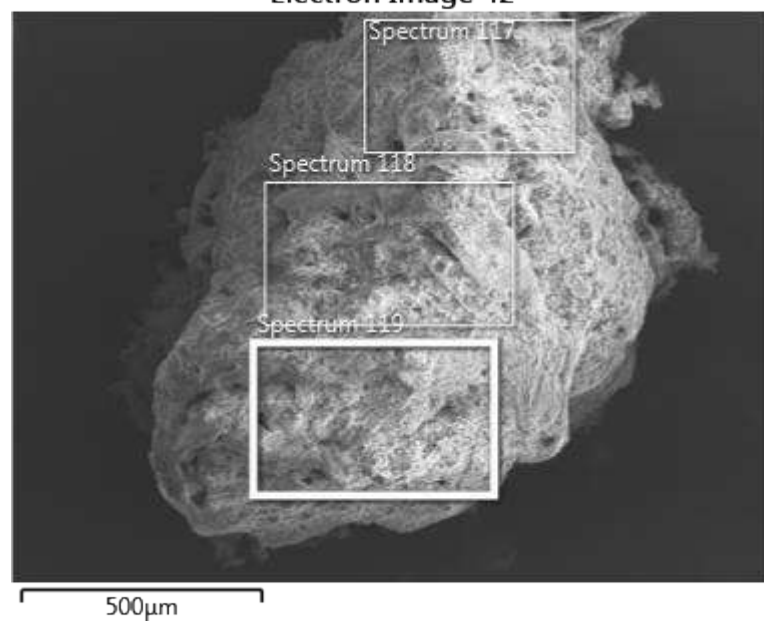

29/11/2019 12:42:16

Project 1

Glandulas salivares Mexico T3

GSM2 15 Kv

Electron Image 43

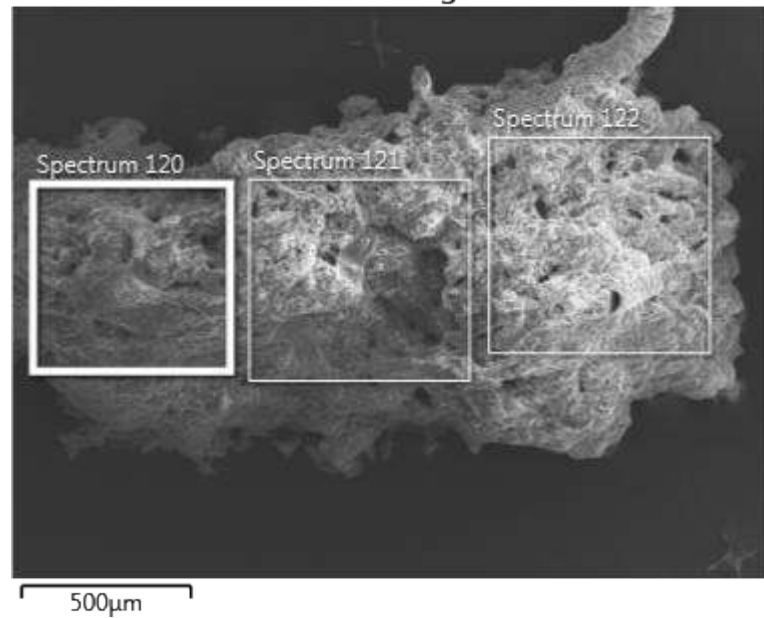

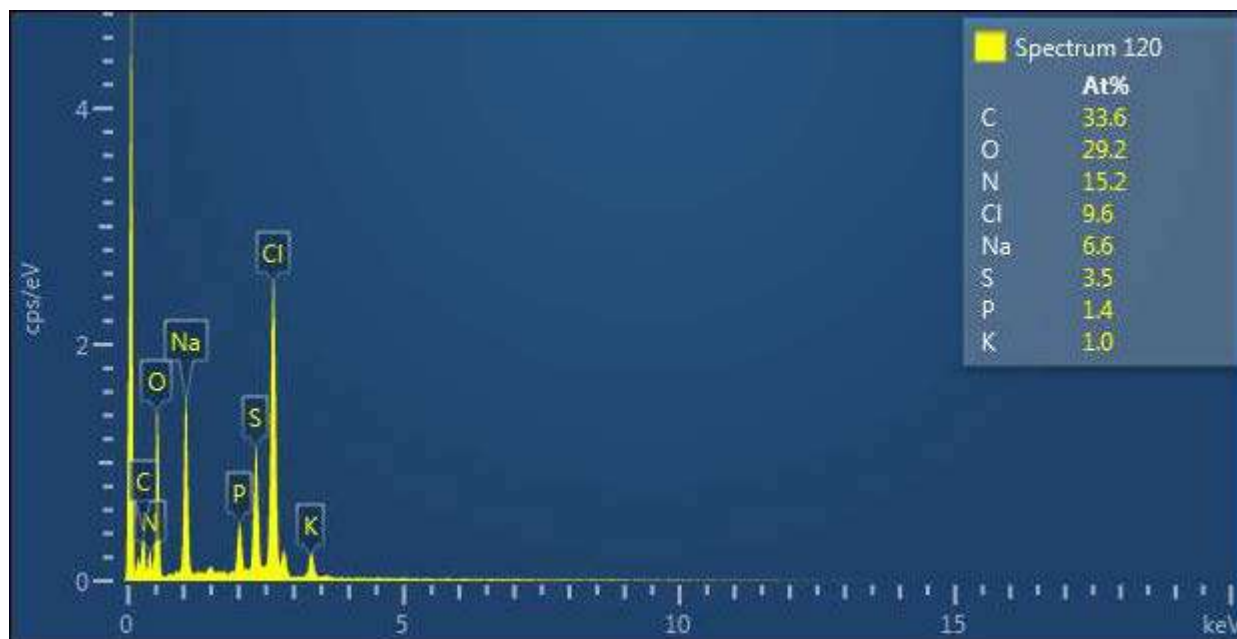

|                                 |                     |
|---------------------------------|---------------------|
| Label:                          | Spectrum 120        |
| Source:                         | Acquired            |
| Created:                        | 29/11/2019 12:42:16 |
| Livetime:                       | 60.5s               |
| Process Time:                   | 4                   |
| Accelerating Voltage:           | 15.00kV             |
| Magnification:                  | 50 x                |
| Working Distance:               | 9.8mm               |
| Specimen Tilt (degrees):        | 0.0                 |
| Elevation (degrees):            | 35.0                |
| Azimuth (degrees):              | 0.0                 |
| Number Of Channels:             | 2048                |
| Energy Range (keV):             | 20 keV              |
| Energy per Channel (eV):        | 10.0eV              |
| Detector Type Id:               | 29                  |
| Detector Type:                  | X-Max               |
| Window Type:                    | SATW                |
| Pulse Pile Up Correction:       | Succeeded           |
| Primary Detector:               | 2617                |
| Primary Detector Serial Number: | 77871-X080          |

| Element | Line Type | Apparent Concentration | k Ratio | Wt%   | Wt% Sigma | Standard Label | Factory Standard | Standard Calibration Date |
|---------|-----------|------------------------|---------|-------|-----------|----------------|------------------|---------------------------|
| C       | K series  | 0.69                   | 0.00686 | 22.83 | 1.65      | C Vit          | Yes              |                           |
| N       | K series  | 2.33                   | 0.00414 | 12.03 | 1.04      | BN             | Yes              |                           |
| O       | K series  | 4.18                   | 0.01408 | 26.42 | 0.77      | SiO2           | Yes              |                           |
| Na      | K         | 2.63                   | 0.01110 | 8.58  | 0.27      | Albite         | Yes              |                           |

|        |          |      |         |        |      |      |     |  |
|--------|----------|------|---------|--------|------|------|-----|--|
|        | series   |      |         |        |      |      |     |  |
| P      | K series | 0.90 | 0.00504 | 2.42   | 0.12 | GaP  | Yes |  |
| S      | K series | 1.63 | 0.01406 | 6.41   | 0.21 | FeS2 | Yes |  |
| Cl     | K series | 4.50 | 0.03934 | 19.21  | 0.52 | NaCl | Yes |  |
| K      | K series | 0.50 | 0.00422 | 2.11   | 0.12 | KBr  | Yes |  |
| Total: |          |      |         | 100.00 |      |      |     |  |

Electron Image 43

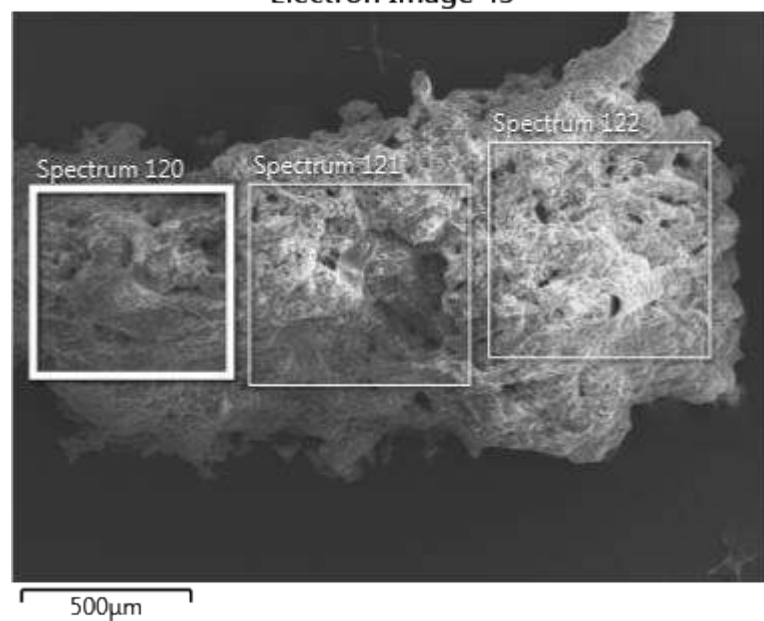

29/11/2019 12:43:23

Project 1

Glandulas salivares Mexico T3

GSM2 15 Kv

Electron Image 43

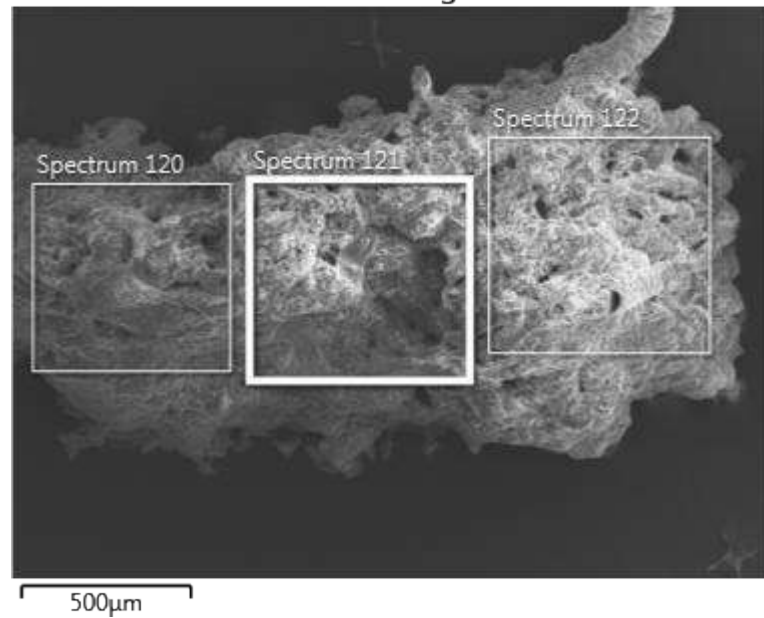



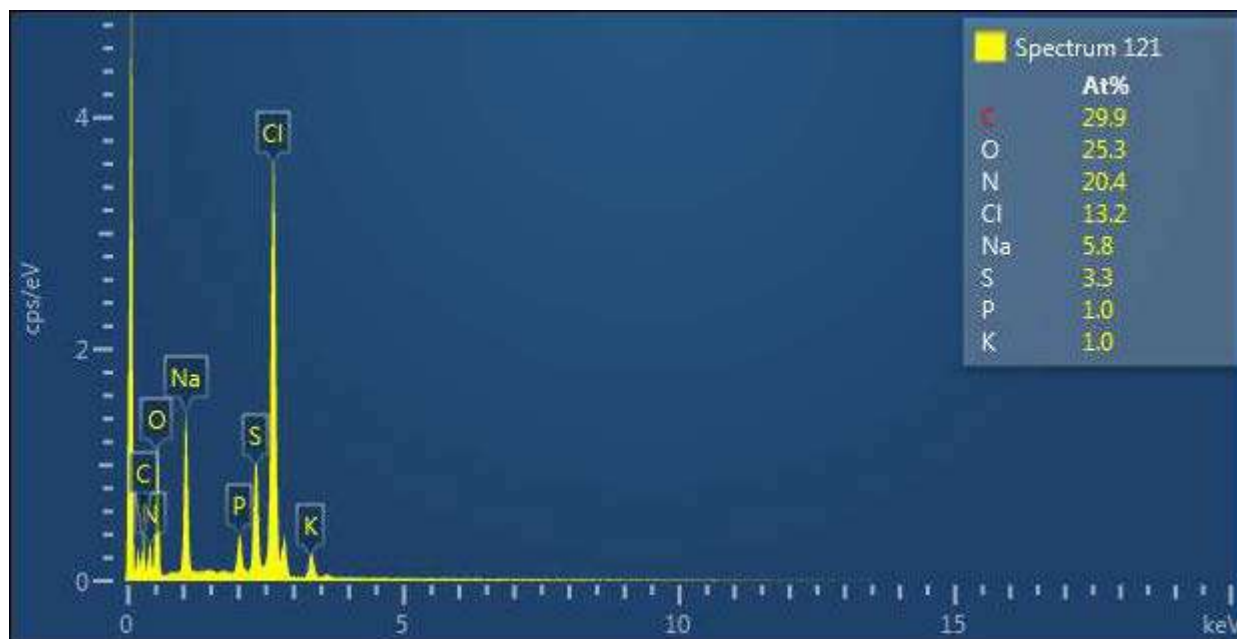

|                                 |                     |
|---------------------------------|---------------------|
| Label:                          | Spectrum 121        |
| Source:                         | Acquired            |
| Created:                        | 29/11/2019 12:43:23 |
| Livetime:                       | 60.4s               |
| Process Time:                   | 4                   |
| Accelerating Voltage:           | 15.00kV             |
| Magnification:                  | 50 x                |
| Working Distance:               | 9.8mm               |
| Specimen Tilt (degrees):        | 0.0                 |
| Elevation (degrees):            | 35.0                |
| Azimuth (degrees):              | 0.0                 |
| Number Of Channels:             | 2048                |
| Energy Range (keV):             | 20 keV              |
| Energy per Channel (eV):        | 10.0eV              |
| Detector Type Id:               | 29                  |
| Detector Type:                  | X-Max               |
| Window Type:                    | SATW                |
| Pulse Pile Up Correction:       | Succeeded           |
| Primary Detector:               | 2617                |
| Primary Detector Serial Number: | 77871-X080          |

| Element | Line Type | Apparent Concentration | k Ratio | Wt%   | Wt% Sigma | Standard Label | Factory Standard | Standard Calibration Date |
|---------|-----------|------------------------|---------|-------|-----------|----------------|------------------|---------------------------|
| C       | K series  | 0.53                   | 0.00530 | 19.62 | 1.77      | C Vit          | Yes              |                           |
| N       | K series  | 3.05                   | 0.00542 | 15.61 | 1.08      | BN             | Yes              |                           |
| O       | K series  | 3.32                   | 0.01118 | 22.15 | 0.71      | SiO2           | Yes              |                           |
| Na      | K         | 2.35                   | 0.00993 | 7.33  | 0.24      | Albite         | Yes              |                           |

|        |          |      |         |        |      |      |     |  |
|--------|----------|------|---------|--------|------|------|-----|--|
|        | series   |      |         |        |      |      |     |  |
| P      | K series | 0.69 | 0.00386 | 1.76   | 0.10 | GaP  | Yes |  |
| S      | K series | 1.56 | 0.01342 | 5.76   | 0.20 | FeS2 | Yes |  |
| Cl     | K series | 6.34 | 0.05539 | 25.59  | 0.69 | NaCl | Yes |  |
| K      | K series | 0.53 | 0.00453 | 2.19   | 0.12 | KBr  | Yes |  |
| Total: |          |      |         | 100.00 |      |      |     |  |

Electron Image 43

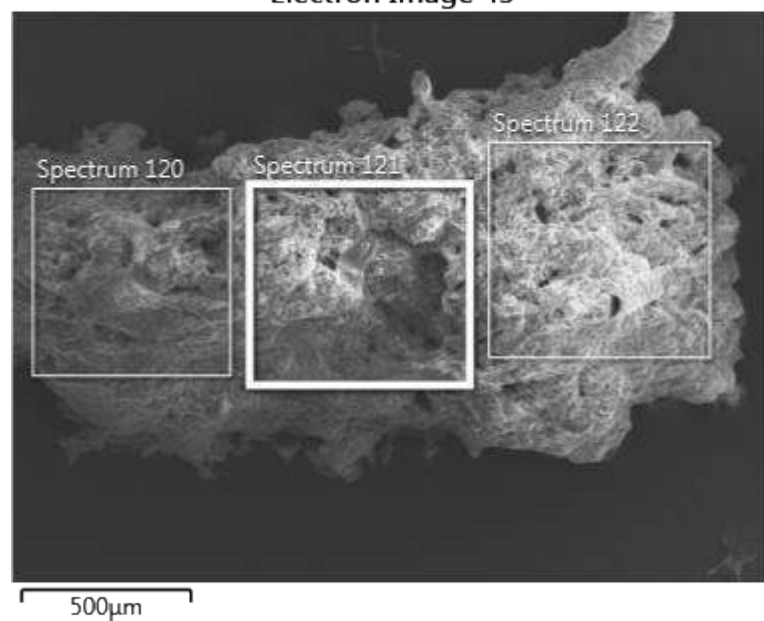

29/11/2019 12:44:30

Project 1

Glandulas salivares Mexico T3

GSM2 15 Kv

Electron Image 43

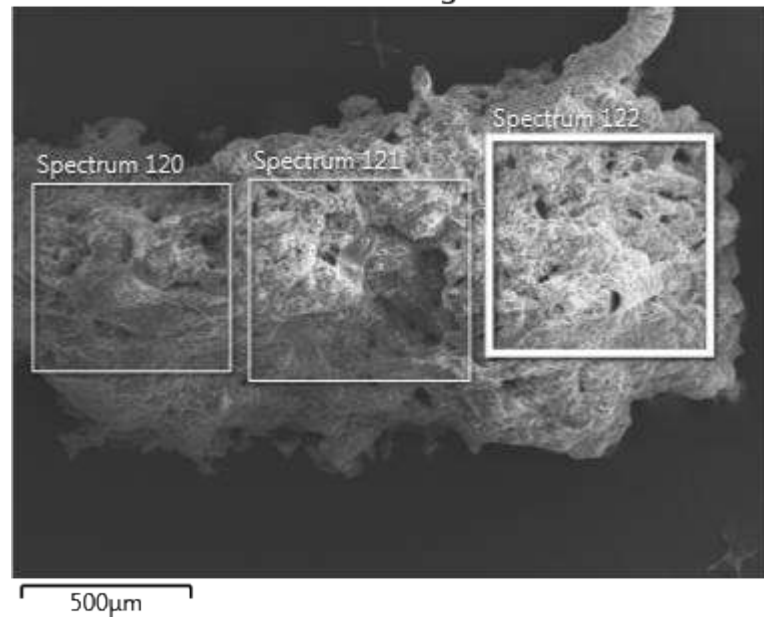

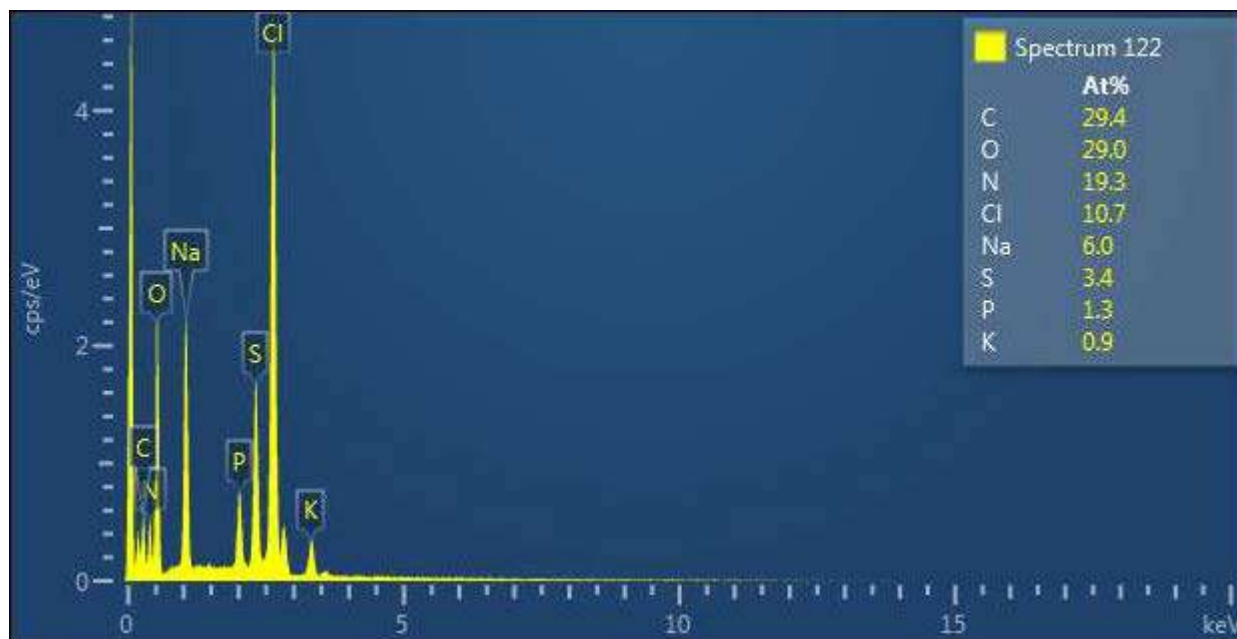

|                                 |                     |
|---------------------------------|---------------------|
| Label:                          | Spectrum 122        |
| Source:                         | Acquired            |
| Created:                        | 29/11/2019 12:44:30 |
| Livetime:                       | 60.3s               |
| Process Time:                   | 4                   |
| Accelerating Voltage:           | 15.00kV             |
| Magnification:                  | 50 x                |
| Working Distance:               | 9.8mm               |
| Specimen Tilt (degrees):        | 0.0                 |
| Elevation (degrees):            | 35.0                |
| Azimuth (degrees):              | 0.0                 |
| Number Of Channels:             | 2048                |
| Energy Range (keV):             | 20 keV              |
| Energy per Channel (eV):        | 10.0eV              |
| Detector Type Id:               | 29                  |
| Detector Type:                  | X-Max               |
| Window Type:                    | SATW                |
| Pulse Pile Up Correction:       | Succeeded           |
| Primary Detector:               | 2617                |
| Primary Detector Serial Number: | 77871-X080          |

| Element | Line Type | Apparent Concentration | k Ratio | Wt%   | Wt% Sigma | Standard Label | Factory Standard | Standard Calibration Date |
|---------|-----------|------------------------|---------|-------|-----------|----------------|------------------|---------------------------|
| C       | K series  | 0.92                   | 0.00917 | 19.71 | 1.31      | C Vit          | Yes              |                           |
| N       | K series  | 4.90                   | 0.00872 | 15.11 | 0.82      | BN             | Yes              |                           |
| O       | K series  | 6.42                   | 0.02161 | 25.96 | 0.60      | SiO2           | Yes              |                           |
| Na      | K         | 3.77                   | 0.01592 | 7.66  | 0.19      | Albite         | Yes              |                           |

|        |          |      |         |        |      |      |     |  |
|--------|----------|------|---------|--------|------|------|-----|--|
|        | series   |      |         |        |      |      |     |  |
| P      | K series | 1.38 | 0.00774 | 2.29   | 0.09 | GaP  | Yes |  |
| S      | K series | 2.49 | 0.02144 | 6.00   | 0.16 | FeS2 | Yes |  |
| Cl     | K series | 8.10 | 0.07081 | 21.24  | 0.44 | NaCl | Yes |  |
| K      | K series | 0.78 | 0.00659 | 2.04   | 0.09 | KBr  | Yes |  |
| Total: |          |      |         | 100.00 |      |      |     |  |

Electron Image 43

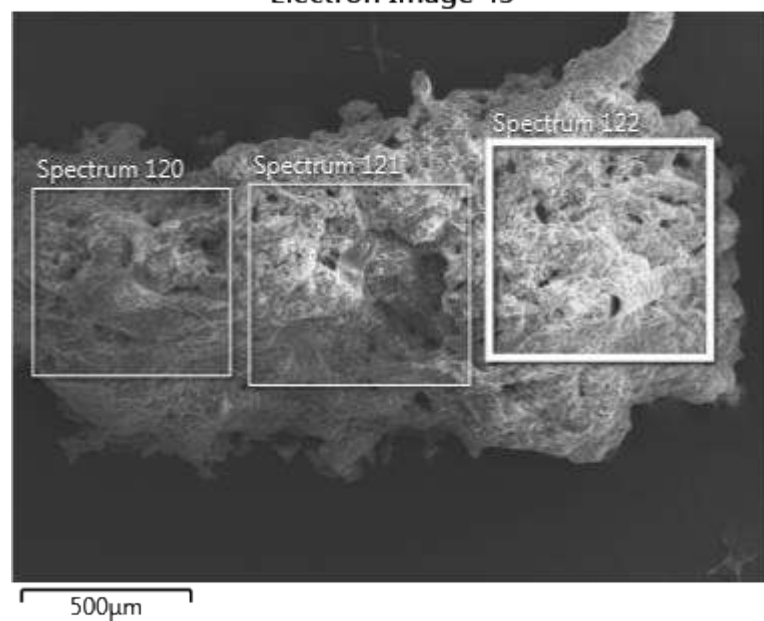

29/11/2019 12:46:40

Project 1

Glandulas salivares Mexico T3

GSM3 15 Kv

Electron Image 44

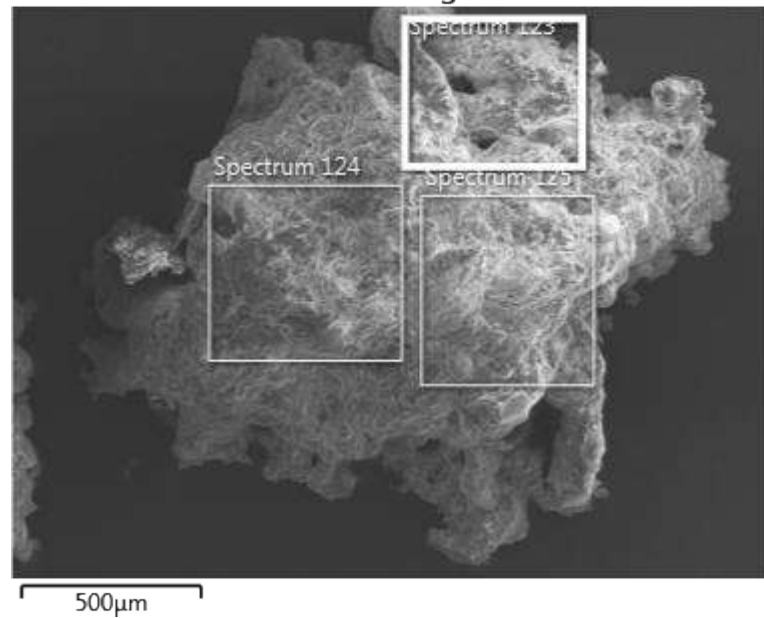

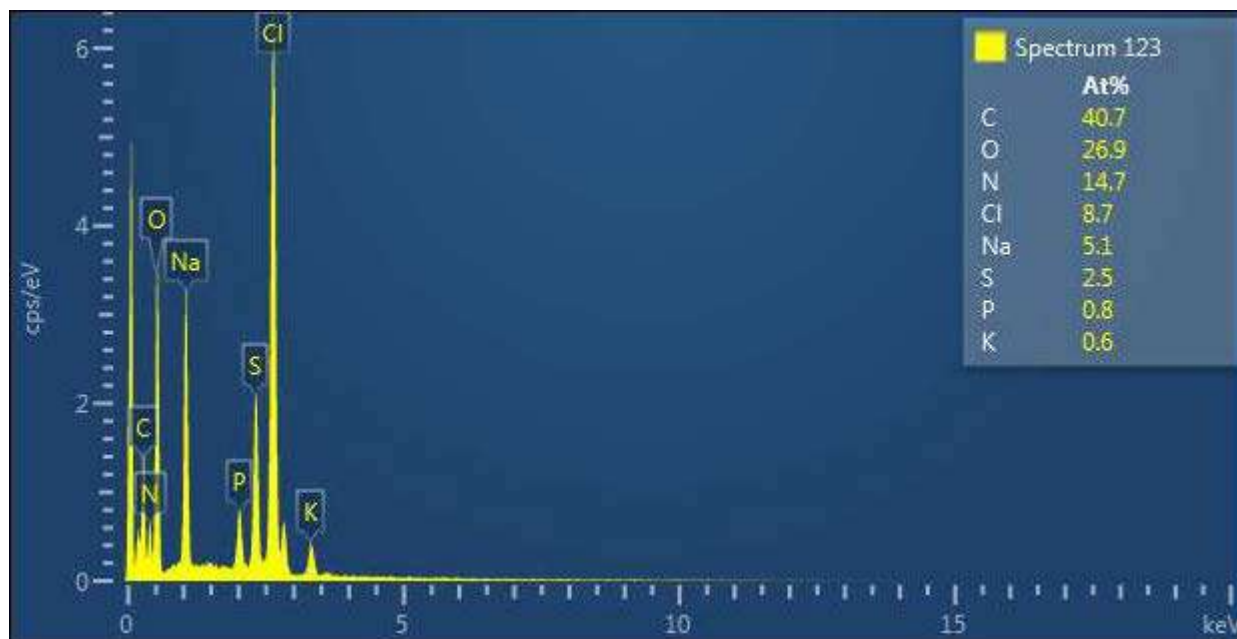

|                                 |                     |
|---------------------------------|---------------------|
| Label:                          | Spectrum 123        |
| Source:                         | Acquired            |
| Created:                        | 29/11/2019 12:46:40 |
| Livetime:                       | 60.5s               |
| Process Time:                   | 4                   |
| Accelerating Voltage:           | 15.00kV             |
| Magnification:                  | 53 x                |
| Working Distance:               | 9.8mm               |
| Specimen Tilt (degrees):        | 0.0                 |
| Elevation (degrees):            | 35.0                |
| Azimuth (degrees):              | 0.0                 |
| Number Of Channels:             | 2048                |
| Energy Range (keV):             | 20 keV              |
| Energy per Channel (eV):        | 10.0eV              |
| Detector Type Id:               | 29                  |
| Detector Type:                  | X-Max               |
| Window Type:                    | SATW                |
| Pulse Pile Up Correction:       | Succeeded           |
| Primary Detector:               | 2617                |
| Primary Detector Serial Number: | 77871-X080          |

| Element | Line Type | Apparent Concentration | k Ratio | Wt%   | Wt% Sigma | Standard Label | Factory Standard | Standard Calibration Date |
|---------|-----------|------------------------|---------|-------|-----------|----------------|------------------|---------------------------|
| C       | K series  | 2.53                   | 0.02531 | 29.11 | 0.94      | C Vit          | Yes              |                           |
| N       | K series  | 5.85                   | 0.01042 | 12.24 | 0.68      | BN             | Yes              |                           |
| O       | K series  | 10.11                  | 0.03402 | 25.67 | 0.47      | SiO2           | Yes              |                           |
| Na      | K         | 5.44                   | 0.02296 | 6.95  | 0.14      | Albite         | Yes              |                           |

|        |          |       |         |        |      |      |     |  |
|--------|----------|-------|---------|--------|------|------|-----|--|
|        | series   |       |         |        |      |      |     |  |
| P      | K series | 1.39  | 0.00777 | 1.45   | 0.06 | GaP  | Yes |  |
| S      | K series | 3.13  | 0.02695 | 4.76   | 0.11 | FeS2 | Yes |  |
| Cl     | K series | 11.15 | 0.09744 | 18.33  | 0.31 | NaCl | Yes |  |
| K      | K series | 0.91  | 0.00768 | 1.48   | 0.07 | KBr  | Yes |  |
| Total: |          |       |         | 100.00 |      |      |     |  |

Electron Image 44

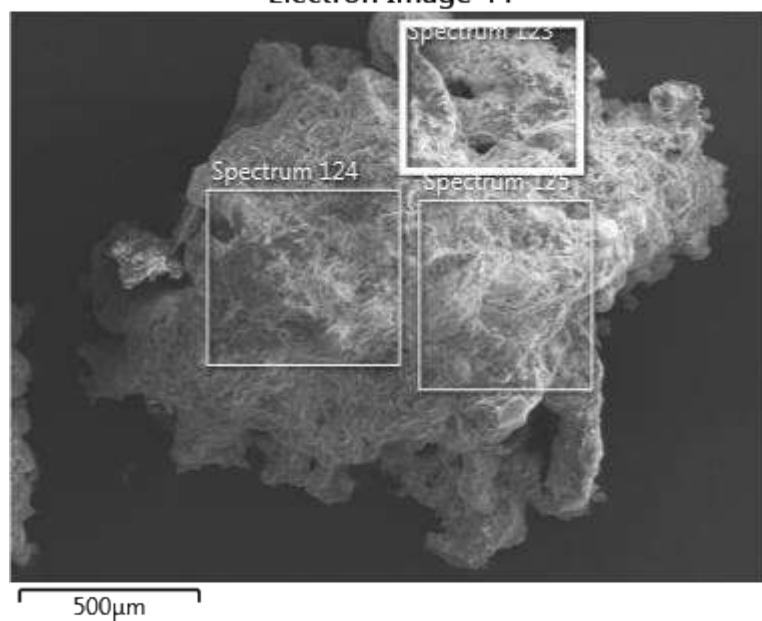



29/11/2019 12:47:49

Project 1

Glandulas salivares Mexico T3

GSM3 15 Kv

Electron Image 44

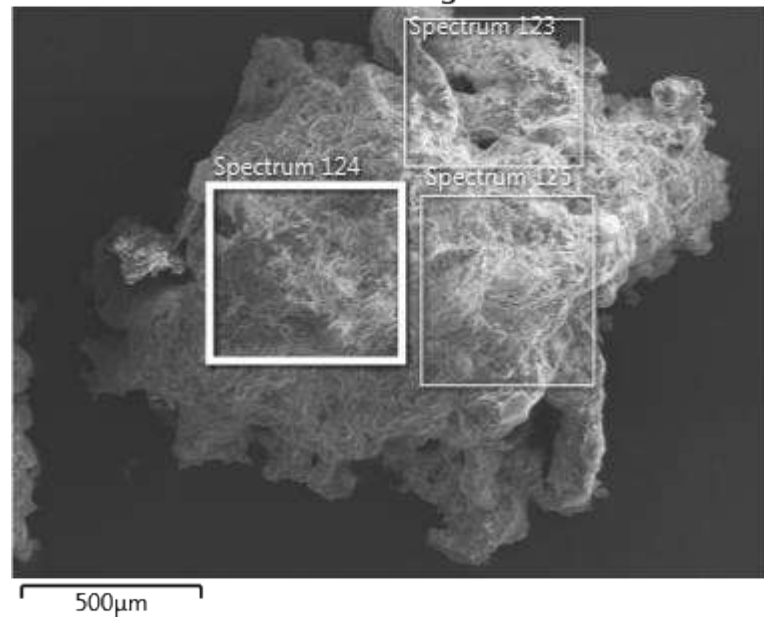

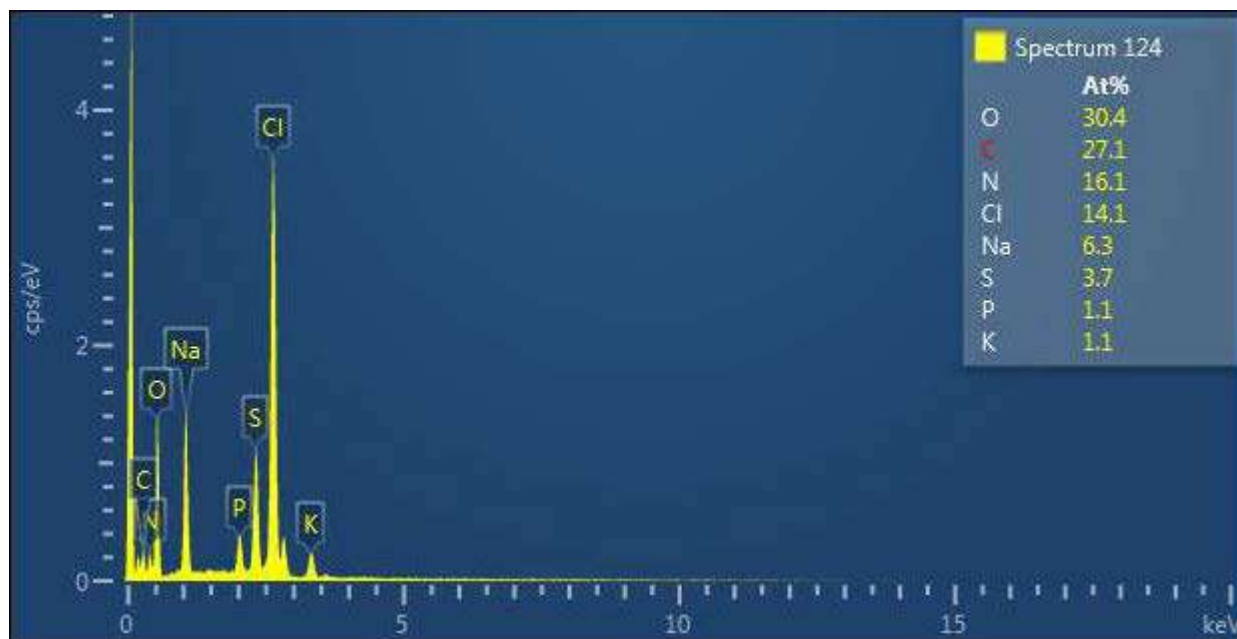

|                                 |                     |
|---------------------------------|---------------------|
| Label:                          | Spectrum 124        |
| Source:                         | Acquired            |
| Created:                        | 29/11/2019 12:47:49 |
| Livetime:                       | 60.3s               |
| Process Time:                   | 4                   |
| Accelerating Voltage:           | 15.00kV             |
| Magnification:                  | 53 x                |
| Working Distance:               | 9.8mm               |
| Specimen Tilt (degrees):        | 0.0                 |
| Elevation (degrees):            | 35.0                |
| Azimuth (degrees):              | 0.0                 |
| Number Of Channels:             | 2048                |
| Energy Range (keV):             | 20 keV              |
| Energy per Channel (eV):        | 10.0eV              |
| Detector Type Id:               | 29                  |
| Detector Type:                  | X-Max               |
| Window Type:                    | SATW                |
| Pulse Pile Up Correction:       | Succeeded           |
| Primary Detector:               | 2617                |
| Primary Detector Serial Number: | 77871-X080          |

| Element | Line Type | Apparent Concentration | k Ratio | Wt%   | Wt% Sigma | Standard Label | Factory Standard | Standard Calibration Date |
|---------|-----------|------------------------|---------|-------|-----------|----------------|------------------|---------------------------|
| C       | K series  | 0.43                   | 0.00427 | 17.28 | 1.82      | C Vit          | Yes              |                           |
| N       | K series  | 2.27                   | 0.00404 | 12.01 | 1.04      | BN             | Yes              |                           |
| O       | K series  | 4.01                   | 0.01349 | 25.89 | 0.78      | SiO2           | Yes              |                           |
| Na      | K         | 2.37                   | 0.01002 | 7.75  | 0.25      | Albite         | Yes              |                           |

|        |          |      |         |        |      |      |     |  |
|--------|----------|------|---------|--------|------|------|-----|--|
|        | series   |      |         |        |      |      |     |  |
| P      | K series | 0.70 | 0.00392 | 1.85   | 0.11 | GaP  | Yes |  |
| S      | K series | 1.65 | 0.01420 | 6.34   | 0.22 | FeS2 | Yes |  |
| Cl     | K series | 6.31 | 0.05512 | 26.57  | 0.71 | NaCl | Yes |  |
| K      | K series | 0.54 | 0.00457 | 2.31   | 0.13 | KBr  | Yes |  |
| Total: |          |      |         | 100.00 |      |      |     |  |

Electron Image 44

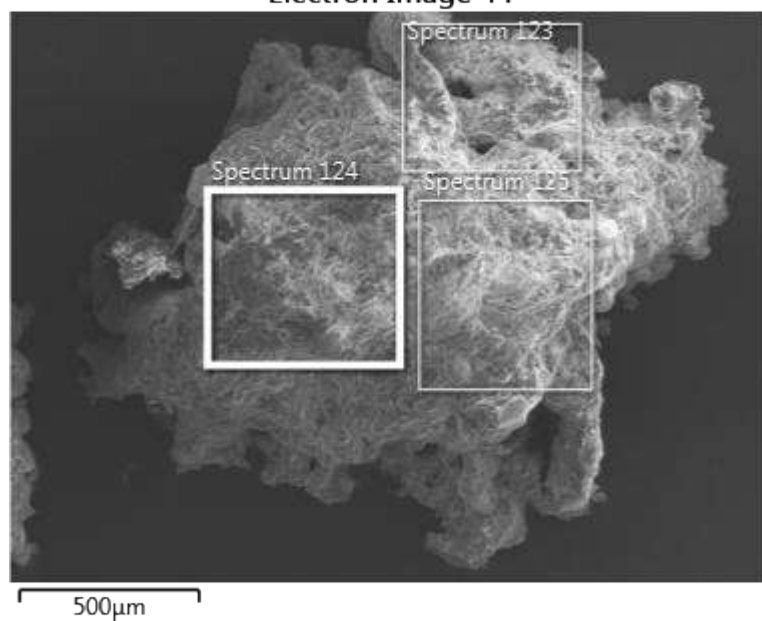

29/11/2019 12:48:56

Project 1

Glandulas salivares Mexico T3

GSM3 15 Kv

Electron Image 44

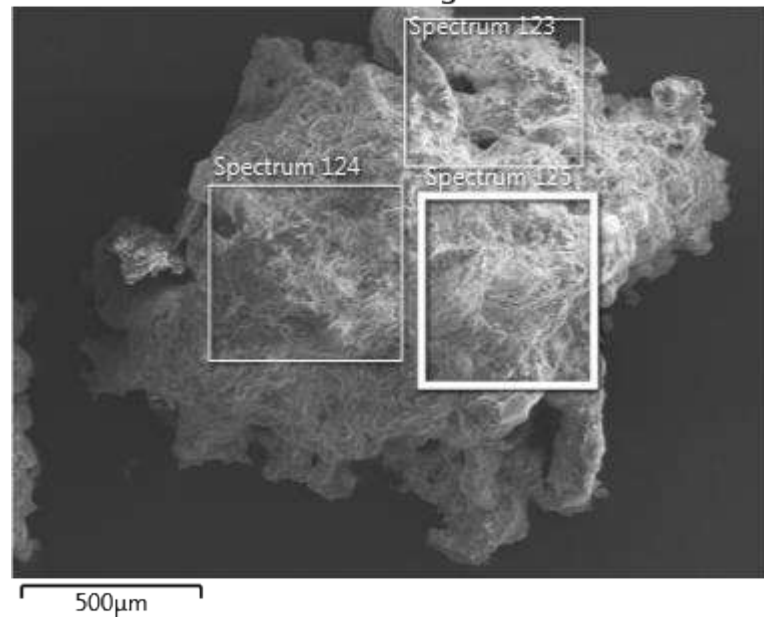

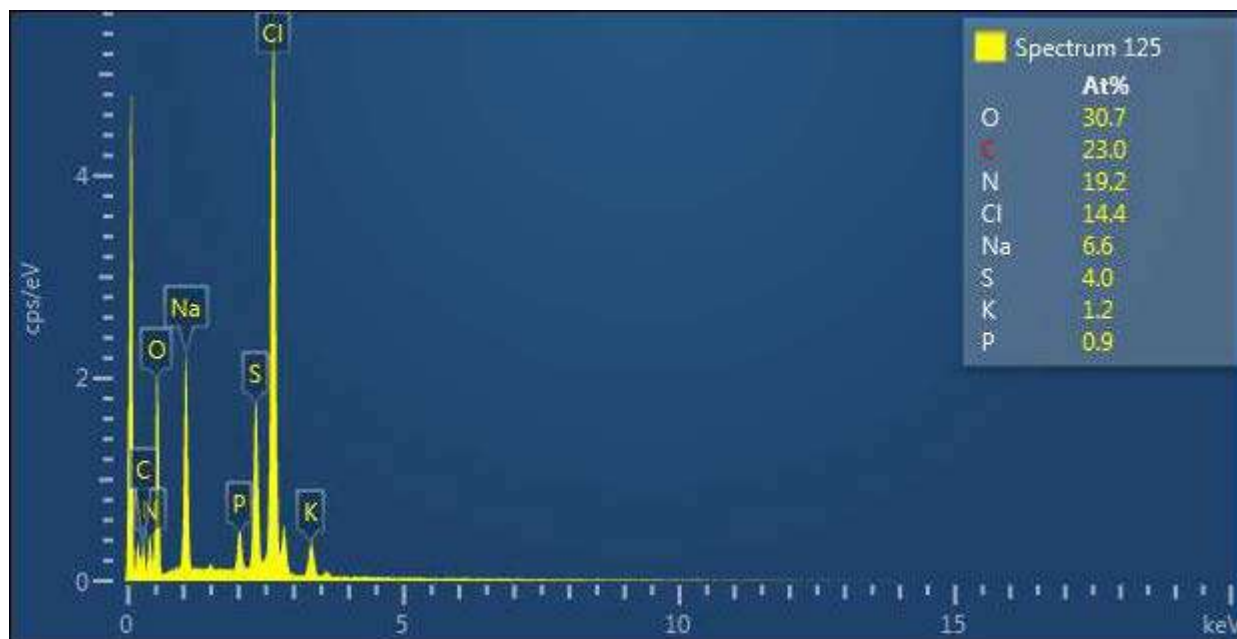

|                                 |                     |
|---------------------------------|---------------------|
| Label:                          | Spectrum 125        |
| Source:                         | Acquired            |
| Created:                        | 29/11/2019 12:48:56 |
| Livetime:                       | 60.1s               |
| Process Time:                   | 4                   |
| Accelerating Voltage:           | 15.00kV             |
| Magnification:                  | 53 x                |
| Working Distance:               | 9.8mm               |
| Specimen Tilt (degrees):        | 0.0                 |
| Elevation (degrees):            | 35.0                |
| Azimuth (degrees):              | 0.0                 |
| Number Of Channels:             | 2048                |
| Energy Range (keV):             | 20 keV              |
| Energy per Channel (eV):        | 10.0eV              |
| Detector Type Id:               | 29                  |
| Detector Type:                  | X-Max               |
| Window Type:                    | SATW                |
| Pulse Pile Up Correction:       | Succeeded           |
| Primary Detector:               | 2617                |
| Primary Detector Serial Number: | 77871-X080          |

| Element | Line Type | Apparent Concentration | k Ratio | Wt%   | Wt% Sigma | Standard Label | Factory Standard | Standard Calibration Date |
|---------|-----------|------------------------|---------|-------|-----------|----------------|------------------|---------------------------|
| C       | K series  | 0.54                   | 0.00536 | 14.53 | 1.50      | C Vit          | Yes              |                           |
| N       | K series  | 4.21                   | 0.00749 | 14.18 | 0.85      | BN             | Yes              |                           |
| O       | K series  | 5.98                   | 0.02011 | 25.88 | 0.63      | SiO2           | Yes              |                           |
| Na      | K         | 3.66                   | 0.01546 | 7.96  | 0.21      | Albite         | Yes              |                           |

|        |          |      |         |        |      |      |     |  |
|--------|----------|------|---------|--------|------|------|-----|--|
|        | series   |      |         |        |      |      |     |  |
| P      | K series | 0.85 | 0.00474 | 1.49   | 0.08 | GaP  | Yes |  |
| S      | K series | 2.62 | 0.02258 | 6.67   | 0.18 | FeS2 | Yes |  |
| Cl     | K series | 9.59 | 0.08383 | 26.79  | 0.58 | NaCl | Yes |  |
| K      | K series | 0.88 | 0.00745 | 2.49   | 0.11 | KBr  | Yes |  |
| Total: |          |      |         | 100.00 |      |      |     |  |

Electron Image 44

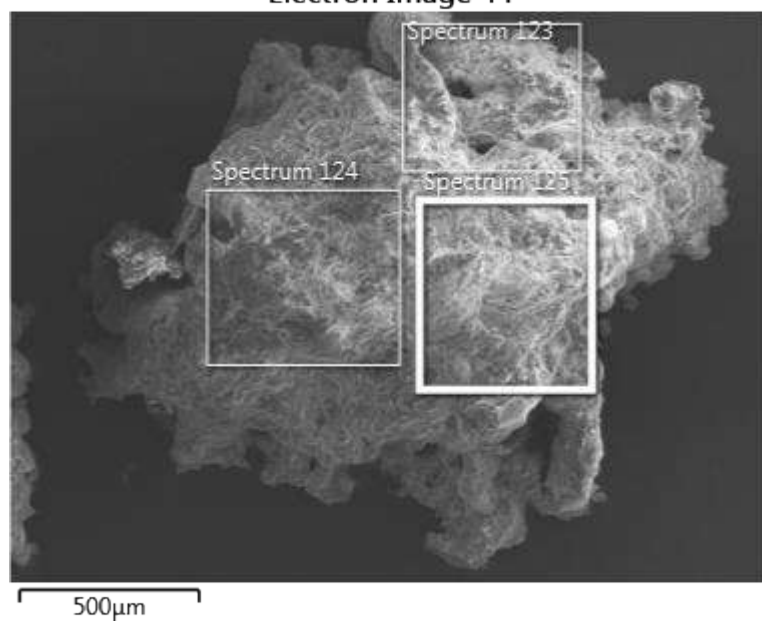

Supplement: s1 [file s1]
